# Supplementary material for: Global species richness of dragonflies and damselflies (Odonata): latitudinal trends and insular colonization
Source: PeerJ. 2025 Sep 15;13:e20004. doi: 10.7717/peerj.20004 (PMC12445290; doi:10.7717/peerj.20004)
Supplement: Supplemental Information 1 [file peerj-13-20004-s001.xlsx]

## Sheet: Biogeography
Country/State	Region	Island	Ischnura species	Zygoptera	Anisoptera	Odonata	Log_Odonata1	Zygop/Anisop	Continent-yes	Island-yes	Log_Continent	Log_Island	%Ischnura	% Ischnura (Zygoptera)	Ischnura/km2	Odonata/km2	Area (km2)	Log_Area	Elevation (m)	Distance	Latitude	Latitude_abs	Year	Reference
Acre (BRA)	S America	no	1	70	70	140	2.14922	1	140		2.14613		0.714286	1.42857	6.09114e-06	0.000852759	164173	5.2153			-9	9	2022	Miranda Filho, J. D. C., Penagos, C. C. M., Calvão, L. B., Miguel, T. B., Bastos, R. C., Ferreira, V. R. S., Lima, D. V. M., Vieira, L. J. S., Brasil, L. S., & Juen, L. (2022). Checklist of Damselflies and Dragonflies (Odonata) from Acre state, and the first record of Drepanoneura loutoni von Ellenrieder & Garrison, 2008 for Brazil. Biota Neotropica, e20211320. https://doi.org/10.1590/1676-0611-B…
Afganistan	C Asia	no	6	18	41	59	1.77815	0.439024	59		1.77085		10.1695	33.3333	9.19023e-06	9.03706e-05	652867	5.81482			34.5167	34.5167	2021	Boudot, Jean-Pierre, Borisov, Sergey, De Knijf, G., Van Grunsven, R. H. A., Schröter, A., & Kalkman, V. J. (2021). Atlas of the dragonflies and damselflies of West and Central Asia. 22 supplement, 1–247.
Alabama (USA)	N America	no	6	52	130	182	2.26245	0.4	182		2.26007		3.2967	11.5385	4.4194e-05	0.00134055	135765	5.13279			32.3675	32.3675	2025	http://www.odonatacentral.org
Åland Islands (FIN)	Europe	yes	0	2	9	11	1.07918	0.222222		11		1.04139	0	0	0	0.00696203	1580	3.19866	129.1	38	60.1	60.1	2022	Sandall, E. L., Pinkert, S., & Jetz, W. (2022). Country‐level checklists and occurrences for the world’s Odonata (dragonflies and damselflies). Journal of Biogeography, 49(8), 1586–1598. https://doi.org/10.1111/jbi.14457
Alaska (USA)	N America	no	0	8	28	36	1.5682	0.285714	36		1.5563		0	0	0	2.08897e-05	1723337	6.23637			58.3	58.3	2025	http://www.odonatacentral.org
Albaguen island (PHL)	SE Asia	yes	0	0	4	4	0.69897	0		4		0.60206	0	#DIV/0!	0	1.14286	3.5	0.544068	118	6	10.5	10.5	1997	Hämäläinen, M., & Mueller, R. A. (1997). Synopsis of the Philippine Odonata, with lists of species recorded from forty islands. Odonatologica, 26, 249–315.
Albania	Europe	no	2	23	36	59	1.77815	0.638889	59		1.77085		3.38983	8.69565	6.95701e-05	0.00205232	28748	4.45861			41.3167	41.3167	2022	Sandall, E. L., Pinkert, S., & Jetz, W. (2022). Country‐level checklists and occurrences for the world’s Odonata (dragonflies and damselflies). Journal of Biogeography, 49(8), 1586–1598. https://doi.org/10.1111/jbi.14457
Alberta (CAN)	N America	no	4	22	49	71	1.85733	0.44898	71		1.85126		5.6338	18.1818	6.04367e-06	0.000107275	661849	5.82076			54.5	54.5	2025	http://www.odonatacentral.org
Aldermen islands (NZL)	Pacific Ocean	yes	1	1	0	1	0.30103	#DIV/0!		1		0	100	100	0.769231	0.769231	1.3	0.113943	180	20	-36.9667	36.9667	1995	Early, J. W. (1995). Insects of the Aldermen islands. Tane, 35, 1–14.
Algeria	N Africa	no	5	27	42	69	1.8451	0.642857	69		1.83885		7.24638	18.5185	2.0993e-06	2.89704e-05	2381741	6.37689			36.7	36.7	2022	Sandall, E. L., Pinkert, S., & Jetz, W. (2022). Country‐level checklists and occurrences for the world’s Odonata (dragonflies and damselflies). Journal of Biogeography, 49(8), 1586–1598. https://doi.org/10.1111/jbi.14457
Alor island (IDN)	SE Asia	yes	0	5	8	13	1.14613	0.625		13		1.11394	0	0	0	0.00611788	2124.92	3.32734	1423	30	-8.25	8.25	2020	Pinto, R. M. da S., Lopes, J. P., Trainor, C. R., & Seehausen, M. (2020). New records of Odonata from the eastern Lesser Sunda Islands of Timor, Semau, Rote, and Alor, with discovery of Hemicordulia eduardi (Odonata: Corduliidae). Faunistic Studies in South-East Asian and Pacific Island Odonata, 33, 1–60.
Amapá (BRA)	S America	no	2	23	31	65	1.81954	0.741935	65		1.81291		3.07692	8.69565	1.40042e-05	0.000455136	142815	5.15477			1	1	2021	Garcia Junior, M. D. N., Damasceno, M. T. D. S., Martins, M. J. L., Costa, T. S. D., Ferreira, R. M. D. A., & Souto, R. N. P. (2021). New records of dragonflies and damselflies (Insecta: Odonata) from Amapá state, Brazil. Biota Neotropica, 21(1), e20201074. https://doi.org/10.1590/1676-0611-bn-2020-1074
Amazonas (BRA)	S America	no	2	147	177	324	2.51188	0.830508	324		2.51055		0.617284	1.36054	1.27328e-06	0.000206271	1.57075e+06	6.19611			-5	5	2020	Koroiva, R., Neiss, U. G., Fleck, G., & Hamada, N. (2020). Checklist of dragonflies and damselflies (Insecta: Odonata) of the Amazonas state, Brazil. Biota Neotropica, 20(1), e20190877. https://doi.org/10.1590/1676-0611-bn-2019-0877
Amsterdam island	Indian Ocean	yes	0	0	1	1	0.30103	0		1		0	0	#DIV/0!	0	0.0176678	56.6	1.75282	867	3400	-37.8333	37.8333	2019	Devaud, M., & Lebouvier, M. (2019). First record of Pantala flavescens (Anisoptera: Libellulidae) from the remote Amsterdam Island, southern Indian Ocean. Polar Biology, 42(5), 1041–1046. https://doi.org/10.1007/s00300-019-02479-3
Andaman island (IND)	Indian Ocean	yes	1	14	40	54	1.74036	0.35		54		1.73239	1.85185	7.14286	0.000156055	0.00842697	6408	3.80672	732	1370	12.5	12.5	2015	Sivaperuman, C. (2015). Odonata of Andaman and Nicobar Islands, India. In Aquatic Ecosystem: Biodiversity, Ecology and Conservation (pp. 153–162). doi:10.1007/978-81-322-2178-4
Andorra	Europe	no	1	6	13	19	1.30103	0.461538	19		1.27875		5.26316	16.6667	0.00213844	0.0406304	467.63	2.6699			42.5064	42.5064	2022	Sandall, E. L., Pinkert, S., & Jetz, W. (2022). Country‐level checklists and occurrences for the world’s Odonata (dragonflies and damselflies). Journal of Biogeography, 49(8), 1586–1598. https://doi.org/10.1111/jbi.14457
Angola	S Africa	no	1	108	177	285	2.45637	0.610169	285		2.45484		0.350877	0.925926	8.02118e-07	0.000228604	1246700	6.09576			-8.83333	8.83333	2022	Sandall, E. L., Pinkert, S., & Jetz, W. (2022). Country‐level checklists and occurrences for the world’s Odonata (dragonflies and damselflies). Journal of Biogeography, 49(8), 1586–1598. https://doi.org/10.1111/jbi.14457
Anguilla (GBR)	Caribean	yes	1	2	3	5	0.778151	0.666667		5		0.69897	20	50	0.010989	0.0549451	91	1.95904	73	827	18.2208	18.2208	2022	Sandall, E. L., Pinkert, S., & Jetz, W. (2022). Country‐level checklists and occurrences for the world’s Odonata (dragonflies and damselflies). Journal of Biogeography, 49(8), 1586–1598. https://doi.org/10.1111/jbi.14457
Anjoan island (COM)	Indian Ocean	yes	0	4	15	19	1.30103	0.266667		19		1.27875	0	0	0	0.0448113	424	2.62737	1595	415	-12.215	12.215	2021	Dijkstra, K.-D. B., & Cohen, C. (2021). Libellules et demoiselles de Madagascar et des iles d l’Ouest de l’Ocean Indien / Dragonflies and damselflies of Madagascar and the Western Indian Ocean islands. Association Vahatra.
Antigua	Caribean	yes	1	2	6	8	0.954243	0.333333		8		0.90309	12.5	50	0.00355872	0.0284698	281	2.44871	402	707	17.085	17.085	2006	Bass, D. (2006). A survey of freshwater macroinvertebrates on Antigua, West Indies. Living World, Journal of the Trinidad and Tobago Naturalists Club, 2006, 11–14.
Arizona (USA)	N America	no	8	64	85	149	2.17609	0.752941	149		2.17319		5.36913	12.5	2.70953e-05	0.00050465	295254	5.4702			33.4483	33.4483	2025	http://www.odonatacentral.org
Arkansas (USA)	N America	no	6	45	102	147	2.17026	0.441176	147		2.16732		4.08163	13.3333	4.452e-05	0.00109074	134771	5.1296			34.7444	34.7444	2025	http://www.odonatacentral.org
Armenia	W Asia	no	3	23	42	65	1.81954	0.547619	65		1.81291		4.61538	13.0435	0.000100671	0.00218121	29800	4.47422			40.1835	40.1835	2021	Boudot, Jean-Pierre, Borisov, Sergey, De Knijf, G., Van Grunsven, R. H. A., Schröter, A., & Kalkman, V. J. (2021). Atlas of the dragonflies and damselflies of West and Central Asia. 22 supplement, 1–247.
Aruba	Caribean	yes	1	1	17	18	1.27875	0.0588235		18		1.25527	5.55556	100	0.00555556	0.1	180	2.25527	188	27.3	12.5186	12.5186	2022	Sandall, E. L., Pinkert, S., & Jetz, W. (2022). Country‐level checklists and occurrences for the world’s Odonata (dragonflies and damselflies). Journal of Biogeography, 49(8), 1586–1598. https://doi.org/10.1111/jbi.14457
Australian Cap. Terr.	Oceania	no	2	26	43	69	1.8451	0.604651	69		1.83885		2.89855	7.69231	0.000848176	0.0292621	2358	3.37254			-35.3081	35.3081	2025	http://regions.ala.org.au
Austria	Europe	no	2	30	51	81	1.91381	0.588235	81		1.90849		2.46914	6.66667	2.38439e-05	0.000965677	83879	4.92365			48.2	48.2	2022	Sandall, E. L., Pinkert, S., & Jetz, W. (2022). Country‐level checklists and occurrences for the world’s Odonata (dragonflies and damselflies). Journal of Biogeography, 49(8), 1586–1598. https://doi.org/10.1111/jbi.14457
Azerbaijan	W Asia	no	3	26	43	69	1.8451	0.604651	69		1.83885		4.34783	11.5385	3.4642e-05	0.000796767	86600	4.93752			40.3833	40.3833	2021	Boudot, Jean-Pierre, Borisov, Sergey, De Knijf, G., Van Grunsven, R. H. A., Schröter, A., & Kalkman, V. J. (2021). Atlas of the dragonflies and damselflies of West and Central Asia. 22 supplement, 1–247.
Bahamas	Caribean	yes	2	6	28	34	1.54407	0.214286		34		1.53148	5.88235	33.3333	0.000143472	0.00243902	13940	4.14426	63	202.1	25.0781	25.0781	2022	https://www.pugetsound.edu/puget-sound-museum-natural-history/biodiversity-resources/insects/dragonflies/world-odonata-list/west-indian-odonata
Bahia (BRA)	S America	no	2	72	102	174	2.24304	0.705882	174		2.24055		1.14943	2.77778	3.53524e-06	0.000307566	565733	5.75261			-12	12	2021	Ribeiro, C., Firme, B., Araujo, S. A., de Sá, A., Zander, F., Teixeira, K., Santos, L. R., & Rodrigues, M. E. (2021). Check-list of Odonata from the state of Bahia, Brazil: Ecological information, distribution, and new state records. Odonatologica, 50(3/4), 161–186.
Bahrain	W Asia	no	1	1	12	13	1.14613	0.0833333	13		1.11394		7.69231	100	0.00127097	0.0165226	786.8	2.89586	134		26.2167	26.2167	2021	Boudot, Jean-Pierre, Borisov, Sergey, De Knijf, G., Van Grunsven, R. H. A., Schröter, A., & Kalkman, V. J. (2021). Atlas of the dragonflies and damselflies of West and Central Asia. 22 supplement, 1–247.
Balabac island (PHL)	SE Asia	yes	0	18	23	41	1.62325	0.782609		41		1.61278	0	0	0	0.0704952	581.6	2.76462	569.1	17.05	7.94194	7.94194	2013	Villanueva, R. J. T., & Cahilog, H. (2013). Odonata Fauna of Balabac Island, Philippines with descriptions of two new species. IDF-Report, 60, 1–34.
Bali (IDN)	SE Asia	yes	1	15	39	54	1.74036	0.384615		54		1.73239	1.85185	6.66667	0.000178886	0.00965985	5590.15	3.74742	3031	444	-8.335	8.335	2024	Dow, R. A., Choong, C. Y., Grinang, J., Lupiyaningdyah, P., Ngiam, R. W. J., & Kalkman, V. J. (2024). Checklist of the Odonata (Insecta) of Sundaland and Wallacea (Malaysia, Singapore, Brunei, Indonesia and Timor Leste). Zootaxa, 5460(1), 1–122. https://doi.org/10.11646/zootaxa.5460.1.1
Balut island (PHL)	SE Asia	yes	0	4	19	23	1.38021	0.210526		23		1.36173	0	0	0	0.421091	54.62	1.73735	862	13.58	5.4	5.4	2014	Villanueva, Reagan J.T., & Cahilog, H. (2014). Odonata Fauna of Balut and Sarangani island, Davao Occidental Province Philippines. IDF-Report, 66, 1–23.
Bangladesh	S Asia	no	4	50	59	109	2.04139	0.847458	109		2.03743		3.66972	8	2.71058e-05	0.000738633	147570	5.169			23.7639	23.7639	2022	Sandall, E. L., Pinkert, S., & Jetz, W. (2022). Country‐level checklists and occurrences for the world’s Odonata (dragonflies and damselflies). Journal of Biogeography, 49(8), 1586–1598. https://doi.org/10.1111/jbi.14457
Barbados	Caribean	yes	1	2	13	15	1.20412	0.153846		15		1.17609	6.66667	50	0.0022779	0.0341686	439	2.64246	336	356.7	13.0978	13.0978	2022	Sandall, E. L., Pinkert, S., & Jetz, W. (2022). Country‐level checklists and occurrences for the world’s Odonata (dragonflies and damselflies). Journal of Biogeography, 49(8), 1586–1598. https://doi.org/10.1111/jbi.14457
Barbuda	Caribean	yes	1	2	4	6	0.845098	0.5		6		0.778151	16.6667	50	0.0062282	0.0373692	160.56	2.20564	44.5	773	17.64	17.64	2012	Meurgey, F., & Poiron, C. (2012). An updated checklist of Lesser Antillean Odonata. International Journal of Odonatology, 15(4), 305–316. https://doi.org/10.1080/13887890.2012.738401
Bartolomé (Galápagos) (ECU)	Pacific Ocean	yes	0	0	1	1	0.30103	0		1		0	0	#DIV/0!	0	0.833333	1.2	0.0791812	114	0.56	-0.285	0.285	2025	Peck, S. B. (2013). CDF Checklist of Galapagos Dragonflies and Damselflies. In F. Bungartz, H. Herrera, P. Jaramillo, N. Tirado, G. Jímenez-Uzcategui, D. Ruiz, A. Guézou, & F. Ziemmeck (Eds.), Charles Darwin Foundation Galapagos Species Checklist—Lista de Especies de Galápagos de la Fundación Charles Darwin (pp. 1–3). Charles Darwin Foundation / Fundación Charles Darwin. / https://datazone.darwin…
Basilan island (PHL)	SE Asia	yes	1	19	29	48	1.6902	0.655172		48		1.68124	2.08333	5.26316	0.000753449	0.0361655	1327.23	3.12295	998	16.55	7	7	1997	Hämäläinen, M., & Mueller, R. A. (1997). Synopsis of the Philippine Odonata, with lists of species recorded from forty islands. Odonatologica, 26, 249–315.
Batan island (PHL)	SE Asia	yes	0	5	4	9	1	1.25		9		0.954243	0	0	0	0.0945577	95.18	1.97855	1009	197	20.4214	20.4214	2009	Villanueva, R. J. T. (2009). Dragonflies of Babuyam and Batanes group of islands, Philippines (Insecta: Odonata). IDF-Report, 17, 1–16.
Batanta island (IDN)	SE Asia	yes	1	24	34	58	1.77085	0.705882		58		1.76343	1.72414	4.16667	0.00208551	0.120959	479.5	2.68079	1184	3.85	-0.867778	0.867778	2021	Kovács, T., Theischinger, G., Horváth, R., & Juhász, P. (2021). Odonata from Batanta (Indonesia, West Papua) with description of one new species. Opuscula Zoologica, 52(2), 119–139. https://doi.org/10.18348/opzool.2021.2.119
Bawean island (IDN)	SE Asia	yes	1	6	17	23	1.38021	0.352941		23		1.36173	4.34783	16.6667	0.00506534	0.116503	197.42	2.29539	655	118	-5.76667	5.76667	2020	Rohman, A., Sulistyono, S., Nuryati, W., Arifandy, A., & Setiyanto, A. (2020). Dragonflies in Bawean Island Nature Reserve, Indonesia. Borneo Journal of Resource Science and Technology, 10(1), 45–50. https://doi.org/10.33736/bjrst.2022.2020
Belarus	Europe	no	2	23	44	67	1.83251	0.522727	67		1.82607		2.98507	8.69565	9.63414e-06	0.000322744	207595	5.31722			53.9167	53.9167	2022	Sandall, E. L., Pinkert, S., & Jetz, W. (2022). Country‐level checklists and occurrences for the world’s Odonata (dragonflies and damselflies). Journal of Biogeography, 49(8), 1586–1598. https://doi.org/10.1111/jbi.14457
Belgium	Europe	no	2	24	47	71	1.85733	0.510638	71		1.85126		2.8169	8.33333	6.51699e-05	0.00231353	30689	4.48698			50.85	50.85	2022	Sandall, E. L., Pinkert, S., & Jetz, W. (2022). Country‐level checklists and occurrences for the world’s Odonata (dragonflies and damselflies). Journal of Biogeography, 49(8), 1586–1598. https://doi.org/10.1111/jbi.14457
Belize	C America	no	4	71	111	182	2.26245	0.63964	182		2.26007		2.1978	5.6338	0.000174171	0.00792476	22966	4.36109			17.25	17.25	2022	Sandall, E. L., Pinkert, S., & Jetz, W. (2022). Country‐level checklists and occurrences for the world’s Odonata (dragonflies and damselflies). Journal of Biogeography, 49(8), 1586–1598. https://doi.org/10.1111/jbi.14457
Benin	W Africa	no	1	33	67	100	2.00432	0.492537	100		2		1	3.0303	8.71361e-06	0.000871361	114763	5.0598			6.49722	6.49722	2022	Sandall, E. L., Pinkert, S., & Jetz, W. (2022). Country‐level checklists and occurrences for the world’s Odonata (dragonflies and damselflies). Journal of Biogeography, 49(8), 1586–1598. https://doi.org/10.1111/jbi.14457
Bermuda	N America	yes	2	2	7	9	1	0.285714		9		0.954243	22.2222	100	0.037594	0.169173	53.2	1.72591	76	1070	32.2961	32.2961	1990	Dunkle, S. W. (1990). Damselflies and Dragonflies of Florida, Bermuda and the Bahamas (Vol. 1&2). Gainesville: Scientific Publishers.
Bhutan	S Asia	no	2	47	77	125	2.10037	0.61039	125		2.09691		1.6	4.25532	5.20915e-05	0.00325572	38394	4.58426			27.4667	27.4667	2006	Mitra, A. (2006). Current status of Odonata of Bhutan: A checklist with four new records. Bhu. J. RNR, 2(1), 136–143.
Biliran island (PHL)	SE Asia	yes	0	12	12	24	1.39794	1		24		1.38021	0	0	0	0.0447753	536.01	2.72917	1346	0.83	11.58	11.58	1997	Hämäläinen, M., & Mueller, R. A. (1997). Synopsis of the Philippine Odonata, with lists of species recorded from forty islands. Odonatologica, 26, 249–315.
Bohol island (PHL)	SE Asia	yes	0	10	23	33	1.53148	0.434783		33		1.51851	0	0	0	0.00684512	4820.95	3.68313	864	82.72	9.9	9.9	1997	Hämäläinen, M., & Mueller, R. A. (1997). Synopsis of the Philippine Odonata, with lists of species recorded from forty islands. Odonatologica, 26, 249–315.
Bolivia	S America	no	3	96	121	217	2.33846	0.793388	217		2.33646		1.38249	3.125	2.7308e-06	0.000197528	1098581	6.04083			-17.8	17.8	2022	Sandall, E. L., Pinkert, S., & Jetz, W. (2022). Country‐level checklists and occurrences for the world’s Odonata (dragonflies and damselflies). Journal of Biogeography, 49(8), 1586–1598. https://doi.org/10.1111/jbi.14457
Bonaire (NLD)	Caribean	yes	1	1	10	11	1.07918	0.1		11		1.04139	9.09091	100	0.00347222	0.0381944	288	2.45939	240	90	12.15	12.15	2022	Sandall, E. L., Pinkert, S., & Jetz, W. (2022). Country‐level checklists and occurrences for the world’s Odonata (dragonflies and damselflies). Journal of Biogeography, 49(8), 1586–1598. https://doi.org/10.1111/jbi.14457
Bongao island (PHL)	SE Asia	yes	0	4	22	26	1.43136	0.181818		26		1.41497	0	0	0	2.49042	10.44	1.0187	408	55.08	5.02056	5.02056	1997	Hämäläinen, M., & Mueller, R. A. (1997). Synopsis of the Philippine Odonata, with lists of species recorded from forty islands. Odonatologica, 26, 249–315.
Borneo (IND, BRN, MYS)	SE Asia	no	1	205	166	371	2.57054	1.23494	371		2.56937		0.269542	0.487805	1.3366e-06	0.000495878	748168	5.874	4095	950	0	0	2024	Dow, R. A., Choong, C. Y., Grinang, Jongkar, & Lupiyaningdyah, P. (2022). Revised Checklist of the Odonata (dragonflies and damselflies) of Borneo. Malayan Nature Journal, 74, 217–240.
Bosnia-Herzegovina	Europe	no	2	24	39	63	1.80618	0.615385	63		1.79934		3.1746	8.33333	3.90556e-05	0.00123025	51209	4.70935			43.8667	43.8667	2013	Kulijer, D., De Knijf, G., & Frankovic, M. (2013). Review of the Odonata of Bosnia and Herzegovina. Odonatologica, 42(2), 109–123.
Botswana	S Africa	no	1	45	85	130	2.11727	0.529412	130		2.11394		0.769231	2.22222	1.71901e-06	0.000223471	581730	5.76472			-24.6583	24.6583	2022	Sandall, E. L., Pinkert, S., & Jetz, W. (2022). Country‐level checklists and occurrences for the world’s Odonata (dragonflies and damselflies). Journal of Biogeography, 49(8), 1586–1598. https://doi.org/10.1111/jbi.14457
Bouvet island (NOR)	Antarctica	yes	0	0	0	0	0	#DIV/0!		0			#DIV/0!	#DIV/0!	0	0	49	1.6902	780	1719	-54.4071	54.4071	2022	Sandall, E. L., Pinkert, S., & Jetz, W. (2022). Country‐level checklists and occurrences for the world’s Odonata (dragonflies and damselflies). Journal of Biogeography, 49(8), 1586–1598. https://doi.org/10.1111/jbi.14457
British Columbia (CAN)	N America	no	4	24	63	87	1.94448	0.380952	87		1.93952		4.5977	16.6667	4.23399e-06	9.20893e-05	944735	5.97531			54	54	2025	http://www.odonatacentral.org
Bucas Grande (PHL)	SE Asia	yes	0	14	10	24	1.39794	1.4		24		1.38021	0	0	0	0.1875	128	2.10721	217	8.75	9.67361	9.67361	2011	Villanueva, R. J. T. (2011). Odonata of Siargao and Bucas Grande islands , The Philippines. International Dragonfly Fund - Report, 34, 1–25.
Bulgaria	Europe	no	2	24	49	73	1.86923	0.489796	73		1.86332		2.73973	8.33333	1.80191e-05	0.000657696	110994	5.0453			42.6975	42.6975	2022	Sandall, E. L., Pinkert, S., & Jetz, W. (2022). Country‐level checklists and occurrences for the world’s Odonata (dragonflies and damselflies). Journal of Biogeography, 49(8), 1586–1598. https://doi.org/10.1111/jbi.14457
Burkina Faso	W Africa	no	1	17	44	61	1.79239	0.386364	61		1.78533		1.63934	5.88235	3.64667e-06	0.000222447	274223	5.4381			12.3667	12.3667	2022	Sandall, E. L., Pinkert, S., & Jetz, W. (2022). Country‐level checklists and occurrences for the world’s Odonata (dragonflies and damselflies). Journal of Biogeography, 49(8), 1586–1598. https://doi.org/10.1111/jbi.14457
Buru (IDN)	SE Asia	yes	1	19	38	57	1.76343	0.5		57		1.75587	1.75439	5.26316	7.90165e-05	0.00450394	12655.6	4.10228	2428	46.4	-3.425	3.425	2024	Dow, R. A., Choong, C. Y., Grinang, J., Lupiyaningdyah, P., Ngiam, R. W. J., & Kalkman, V. J. (2024). Checklist of the Odonata (Insecta) of Sundaland and Wallacea (Malaysia, Singapore, Brunei, Indonesia and Timor Leste). Zootaxa, 5460(1), 1–122. https://doi.org/10.11646/zootaxa.5460.1.1
Burundi	E Africa	no	1	6	17	23	1.38021	0.352941	23		1.36173		4.34783	16.6667	3.59273e-05	0.000826328	27834	4.44458			-3.5	3.5	2022	Sandall, E. L., Pinkert, S., & Jetz, W. (2022). Country‐level checklists and occurrences for the world’s Odonata (dragonflies and damselflies). Journal of Biogeography, 49(8), 1586–1598. https://doi.org/10.1111/jbi.14457
Busuanga island (PHL)	SE Asia	yes	0	8	20	28	1.4624	0.4		28		1.44716	0	0	0	0.0314607	890	2.94939	620	53.86	12.145	12.145	1997	Hämäläinen, M., & Mueller, R. A. (1997). Synopsis of the Philippine Odonata, with lists of species recorded from forty islands. Odonatologica, 26, 249–315.
Cabo Verde	Macaronesia	yes	1	4	14	18	1.27875	0.285714		18		1.25527	5.55556	25	0.000247954	0.00446318	4033	3.60563	2829	600	14.9164	14.9164	2016	Weihrauch, F., Vieira, V., Cordero-Rivera, A., & de Santos Loureiro, N. (2016). Update on the zoogeography of Odonata in the Macaronesian Islands. Boletín ROLA, 8, 9–22. / Sandall, E. L., Pinkert, S., & Jetz, W. (2022). Country‐level checklists and occurrences for the world’s Odonata (dragonflies and damselflies). Journal of Biogeography, 49(8), 1586–1598. https://doi.org/10.1111/jbi.14457
Calayan island (PHL)	SE Asia	yes	1	13	16	29	1.47712	0.8125		29		1.4624	3.44828	7.69231	0.00510204	0.147959	196	2.29226	499	76.91	19.3269	19.3269	2009	Villanueva, R. J. T. (2009). Dragonflies of Babuyam and Batanes group of islands, Philippines (Insecta: Odonata). IDF-Report, 17, 1–16.
California (USA)	N America	no	8	41	74	115	2.06446	0.554054	115		2.0607		6.95652	19.5122	1.88693e-05	0.000271246	423970	5.62734			38.5817	38.5817	2025	http://www.odonatacentral.org
Cambodia	SE Asia	no	2	80	113	193	2.2878	0.707965	193		2.28556		1.03627	2.5	1.10476e-05	0.00106609	181035	5.25776			11.5694	11.5694	2022	Sandall, E. L., Pinkert, S., & Jetz, W. (2022). Country‐level checklists and occurrences for the world’s Odonata (dragonflies and damselflies). Journal of Biogeography, 49(8), 1586–1598. https://doi.org/10.1111/jbi.14457
Cameroon	C Africa	no	1	91	153	244	2.38917	0.594771	244		2.38739		0.409836	1.0989	2.10331e-06	0.000513207	475442	5.6771			3.86667	3.86667	2022	Sandall, E. L., Pinkert, S., & Jetz, W. (2022). Country‐level checklists and occurrences for the world’s Odonata (dragonflies and damselflies). Journal of Biogeography, 49(8), 1586–1598. https://doi.org/10.1111/jbi.14457
Camiguin island (PHL)	SE Asia	yes	1	12	23	35	1.5563	0.521739		35		1.54407	2.85714	8.33333	0.00414182	0.144964	241.44	2.38281	1630	9.47	9.17	9.17	2005	Villanueva, R. J. (2005). Odonate fauna of Camiguin Island, the Philippines. Notulae Odonatologicae, 6(6), 58–63.
Catanduanes island (PHL)	SE Asia	yes	1	33	27	60	1.78533	1.22222		60		1.77815	1.66667	3.0303	0.000670169	0.0402102	1492.16	3.17382	695	7.7	13.8	13.8	2011	Villanueva, R. J. T., & Gil, J. R. S. (2011). Odonata Fauna of Catanduanes Island, Philippines. International Dragonfly Fund - Report, 38, 1–38.
Cayman islands (GBR)	Caribean	yes	2	6	24	30	1.49136	0.25		30		1.47712	6.66667	33.3333	0.00757576	0.113636	264	2.4216	43	493.8	19.32	19.32	2013	Meurgey, F. (2013). A catalogue of the West Indian dragonflies (Insecta: Odonata). Annales de La Société Entomologique de France (Nouvelle Série), 49(3), 298–334. https://doi.org/10.1080/00379271.2013.848066
Cebu island (PHL)	SE Asia	yes	1	11	21	32	1.51851	0.52381		32		1.50515	3.125	9.09091	0.000202277	0.00647286	4943.72	3.69405	1072	145.24	10.32	10.32	1997	Hämäläinen, M., & Mueller, R. A. (1997). Synopsis of the Philippine Odonata, with lists of species recorded from forty islands. Odonatologica, 26, 249–315.
Central African Republic	C Africa	no	0	35	87	122	2.08991	0.402299	122		2.08636		0	0	0	0.000195832	622984	5.79448			4.36667	4.36667	2022	Sandall, E. L., Pinkert, S., & Jetz, W. (2022). Country‐level checklists and occurrences for the world’s Odonata (dragonflies and damselflies). Journal of Biogeography, 49(8), 1586–1598. https://doi.org/10.1111/jbi.14457
Chaco biome (ARG)	S America	no	2	23	37	60	1.78533	0.621622	60		1.77815		3.33333	8.69565	2.9304e-06	8.79121e-05	682500	5.8341			-27.45	27.45	2010	Von Ellenrieder, N. (2010). Odonata biodiversity of the Argentine Chaco biome. International Journal of Odonatology, 13(1), 1–25. https://doi.org/10.1080/13887890.2010.9748357
Chad	C Africa	no	1	11	40	51	1.716	0.275	51		1.70757		1.96078	9.09091	7.69231e-07	3.92308e-05	1300000	6.11394			12.1053	12.1053	2022	Sandall, E. L., Pinkert, S., & Jetz, W. (2022). Country‐level checklists and occurrences for the world’s Odonata (dragonflies and damselflies). Journal of Biogeography, 49(8), 1586–1598. https://doi.org/10.1111/jbi.14457
Chagos archipelago (GBR)	Indian Ocean	yes	1	2	8	10	1.04139	0.25		10		1	10	50	0.0166667	0.166667	60	1.77815	2	1600	-6	6	2022	Carr, P. (2022). Odonata of the Chagos Archipelago, central Indian Ocean: An update. Notulae Odonatologicae, 9(6). https://doi.org/10.60024/zenodo.4268581
Cham islands (VNM)	SE Asia	yes	1	8	17	25	1.41497	0.470588		25		1.39794	4	12.5	0.0666667	1.66667	15	1.17609	200	15	15.9541	15.9541	2016	Phan, Q. T., & Dinh, T. P. A. (2016). Odonata from the Cham Islands, off central Vietnam, collected in September 2015. Faunistic Studies in South-East Asian and Pacific Island Odonata, 13, 1–22.
Channel Islands (GBR)	Europe	yes	2	10	3	13	1.14613	3.33333		13		1.11394	15.3846	20	0.0103093	0.0670103	194	2.2878	143	240	49.43	49.43	1996	Merritt, R., Moore, N. W., & Eversham, B. C. (1996). Atlas of Dragonflies of Britain and Ireland. Huntingdon: Joint Nature Conservation Committee / Institute of Terrestrial Ecology.
Chatham islands (NZL)	Pacific Ocean	yes	0	2	1	3	0.60206	2		3		0.477121	0	0	0	0.00377891	793.88	2.89975	299	800	-44	44	2010	Marinov, M., & McHugh, P. (2010). Comparative study of the Chatham Islands Odonata: Morphological variability, behaviour and demography of the endemic Xanthocnemis tuanuii Rowe, 1987. IDF-Report, 30, 1–44.
Chile	S America	no	2	10	40	50	1.70757	0.25	50		1.69897		4	20	2.64514e-06	6.61286e-05	756102	5.87858			-33.43	33.43	2022	Sandall, E. L., Pinkert, S., & Jetz, W. (2022). Country‐level checklists and occurrences for the world’s Odonata (dragonflies and damselflies). Journal of Biogeography, 49(8), 1586–1598. https://doi.org/10.1111/jbi.14457
Chinijo (ESP)	Macaronesia	yes	0	0	2	2	0.477121	0		2		0.30103	0	#DIV/0!	0	0.0488998	40.9	1.61172	266	155	29.2597	29.2597	2016	Weihrauch, F., Vieira, V., Cordero-Rivera, A., & de Santos Loureiro, N. (2016). Update on the zoogeography of Odonata in the Macaronesian Islands. Boletín ROLA, 8, 9–22.
Christmas Island (AUS)	Indian Ocean	yes	0	0	3	3	0.60206	0		3		0.477121	0	#DIV/0!	0	0.0222222	135	2.13033	361	350	-10.4217	10.4217	2019	James, D. J., Green, P. T., Humphreys, W. F., & Woinarski, J. C. Z. (2019). Endemic species of Christmas Island, Indian Ocean. Records of the Western Australian Museum, 34(2), 55. https://doi.org/10.18195/issn.0312-3162.34(2).2019.055-114 / Kirby, W. F. (1900). Neuroptera. In A monograph of Christmas Island (Indian Ocean) (pp. 139–141). British Museum Natural History.
Chuuk islands (FSM)	Micronesia	yes	1	2	7	9	1	0.285714		9		0.954243	11.1111	50	0.00823045	0.0740741	121.5	2.08458	177	1800	7.41667	7.41667	2004	Buden, D. W., & Paulson, D. R. (2004). The odonata of Chuuk, Eastern Caroline islands, Micronesia. Opuscula Zoologica Fluminensia, 217, 1–11.
Cíes (ESP)	Europe	yes	0	0	2	2	0.477121	0		2		0.30103	0	#DIV/0!	0	0.44843	4.46	0.649335	197	2.6	42.23	42.23	2025	Cordero Rivera, A. Pers. obs.
Cocos (Keeling) Islands (AUS)	Indian Ocean	yes	0	3	4	7	0.90309	0.75		7		0.845098	0	0	0	0.5	14	1.14613	5	1094	-12.1869	12.1869	2013	Gutiérrez Fonseca, P. E., Ramírez, A., Umaña, G., & Springer, M. (2013). Macroinvertebrados dulceacuícolas de la Isla del Coco, Costa Rica: Especies y comparación con otras islas del Pacífico Tropical Oriental. Revista de Biología Tropical, 61(2). https://doi.org/10.15517/rbt.v61i2.11166 / Campion, H. (1923). II.-Notes on dragonflies from the Old World Islands of San Thomé, Rodriguez, Cocos-Keeli…
Colombia	S America	no	10	321	222	543	2.7356	1.44595	543		2.7348		1.84162	3.11526	8.7585e-06	0.000475587	1141748	6.05757			4.58333	4.58333	2024	Bota-Sierra, C. A., Álvarez-Álvarez, K., Amaya, V., Carrillo Camargo, B., Garzón-Salamanca, L. L., Hoyos, A., Mendoza-Penagos, C. C., Montes-Fontalvo, J., Palacino-Rodríguez, F., Pérez-Gutiérrez, L. A., Realpe, E., Sánchez Herrera, M., Sandoval-H, J., Stand-Pérez, M., Torres-Pachón, M., Velásquez, M. I., & Cano-Cobos, Y. (2024). Commented checklist of the Odonata from Colombia. International Jour…
Colorado (USA)	N America	no	9	47	71	118	2.07555	0.661972	118		2.07188		7.62712	19.1489	3.33535e-05	0.000437301	269837	5.4311			39.7392	39.7392	2025	http://www.odonatacentral.org
Congo	C Africa	no	1	152	256	408	2.61172	0.59375	408		2.61066		0.245098	0.657895	4.26365e-07	0.000173957	2345409	6.37022			-5.85472	5.85472	2022	Sandall, E. L., Pinkert, S., & Jetz, W. (2022). Country‐level checklists and occurrences for the world’s Odonata (dragonflies and damselflies). Journal of Biogeography, 49(8), 1586–1598. https://doi.org/10.1111/jbi.14457
Connecticut (USA)	N America	no	6	50	101	151	2.18184	0.49505	151		2.17898		3.97351	12	0.000417944	0.0105183	14356	4.15703			41.7625	41.7625	2025	http://www.odonatacentral.org
Cook Islands	Polynesia	yes	1	2	7	9	1	0.285714		9		0.954243	11.1111	50	0.00422476	0.0380228	236.7	2.3742	652	2300	-21.2	21.2	2010	Martens, A. (2010). New Odonata records from Atiu and Rarotonga, with an overview of the species known from the Cook islands. Notulae Odonatologicae, 7(6), 57–60.
Corfu (GRC)	Europe	yes	1	17	22	39	1.60206	0.772727		39		1.59106	2.5641	5.88235	0.00163693	0.0638402	610.9	2.78597	906	3	39.6	39.6	2018	Stille, M., & Stille, B. (2018). The Dragonflies of Corfu. IDF-Report, 116, 1–238.
Corsica (FRA)	Europe	yes	2	19	25	44	1.65321	0.76		44		1.64345	4.54545	10.5263	0.000229305	0.00504471	8722	3.94062	2706	90	41.9267	41.9267	2009	Boudot, J. P., Kalkman, V. J., Azpilicueta Amorín, M., Bogdanovic, T., Cordero Rivera, A., Degabriele, G., … Schneider, W. (2009). Atlas of the Odonata of the Mediterranean and North Africa. Libellula Supplement, 9, 1–256.
Corvo (PRT)	Macaronesia	yes	2	2	2	4	0.69897	1		4		0.60206	50	100	0.116822	0.233645	17.12	1.2335	720	1860	39.6975	39.6975	2016	Weihrauch, F., Vieira, V., Cordero-Rivera, A., & de Santos Loureiro, N. (2016). Update on the zoogeography of Odonata in the Macaronesian Islands. Boletín ROLA, 8, 9–22.
Costa Rica	C America	no	3	126	174	300	2.47857	0.724138	300		2.47712		1	2.38095	5.86167e-05	0.00586167	51179.9	4.7091			9.93333	9.93333	2022	Sandall, E. L., Pinkert, S., & Jetz, W. (2022). Country‐level checklists and occurrences for the world’s Odonata (dragonflies and damselflies). Journal of Biogeography, 49(8), 1586–1598. https://doi.org/10.1111/jbi.14457
Côte d'Ivoire	W Africa	no	0	56	124	180	2.25768	0.451613	180		2.25527		0	0	0	0.000558205	322462	5.50848			6.85	6.85	2022	Sandall, E. L., Pinkert, S., & Jetz, W. (2022). Country‐level checklists and occurrences for the world’s Odonata (dragonflies and damselflies). Journal of Biogeography, 49(8), 1586–1598. https://doi.org/10.1111/jbi.14457
Cousine (SYC)	Indian Ocean	yes	0	1	4	5	0.778151	0.25		5		0.69897	0	0	0	16.6667	0.3	-0.522879	76	1120	-4.36333	4.36333	1998	Samways, M. J. (1998). Establishment of resident Odonata populations on the formerly waterless Cousine Island, Seychelles: An island biogeography theory (IBT) perspective. Odonatologica, 27, 253–258.
Crete (GRC)	Europe	yes	2	14	22	36	1.5682	0.636364		36		1.5563	5.55556	14.2857	0.000236686	0.00426036	8450	3.92686	2456	100	35.21	35.21	2015	Boudot, J.-P., & Kalkman, V. J. (2015). Atlas of the European dragonflies and damselflies. KNNV Publishing. / Martens, A. (2023). First record of Isoaeschna isoceles (Müller) on the island of Crete, Greece (Odonata: Aeshnidae). Libellula, 42(3/4), 163–165.
Croatia	Europe	no	2	23	45	68	1.83885	0.511111	68		1.83251		2.94118	8.69565	3.53601e-05	0.00120224	56561	4.75252			45.8131	45.8131	2022	Sandall, E. L., Pinkert, S., & Jetz, W. (2022). Country‐level checklists and occurrences for the world’s Odonata (dragonflies and damselflies). Journal of Biogeography, 49(8), 1586–1598. https://doi.org/10.1111/jbi.14457
Cuba	Caribean	yes	3	27	64	91	1.96379	0.421875		91		1.95904	3.2967	11.1111	2.70612e-05	0.000820855	110860	5.04477	1974	200	23.1333	23.1333	2024	Trapero-Quintana, A. D., Torres Cambas, Y., & Martínez Valle, A. (2018). Las libélulas de Cuba: Una actualización taxonómica 10 años después. Revista Cubana de Ciencias Biológicas, 6(2), 1–8. / https://www.pugetsound.edu/puget-sound-museum-natural-history/biodiversity-resources/insects/dragonflies/world-odonata-list/west-indian-odonata
Curaçao (NLD)	Caribean	yes	1	4	17	21	1.34242	0.235294		21		1.32222	4.7619	25	0.00225225	0.0472973	444	2.64738	372	67	12.1167	12.1167	2014	Paulson, D. R., de Haseth, C., & Debrot, A. O. (2014). Odonata of Curaçao, southern Caribbean, with an update to the fauna of the ABC islands. International Journal of Odonatology, 17(4), 237–249. Retrieved from http://dx.doi.org/10.1080/13887890.2014.981877
Cuyo island (PHL)	SE Asia	yes	1	3	8	11	1.07918	0.375		11		1.04139	9.09091	33.3333	0.0117716	0.129488	84.95	1.92916	186	91.41	10.85	10.85	2018	Villanueva, R. J. T., Cahilog, H., Jose, E., & van Beijnen. (2018). A brief odonatological survey in Palawan and in Cuyo Island, the Philippines. IDF-Report, 119, 1–12.
Cyprus	Europe	yes	1	8	26	34	1.54407	0.307692		34		1.53148	2.94118	12.5	0.000108096	0.00367528	9251	3.96619	1952	105	35.1667	35.1667	2021	Sparrow, D. J., Knijf, G. D., & Sparrow, R. L. (2021). Diversity, status and phenology of the dragonflies and damselflies of Cyprus (Insecta: Odonata). Diversity, 13, 532.
Czech Republic	Europe	no	2	26	49	75	1.88081	0.530612	75		1.87506		2.66667	7.69231	2.53579e-05	0.00095092	78871	4.89692			50.0833	50.0833	2022	Sandall, E. L., Pinkert, S., & Jetz, W. (2022). Country‐level checklists and occurrences for the world’s Odonata (dragonflies and damselflies). Journal of Biogeography, 49(8), 1586–1598. https://doi.org/10.1111/jbi.14457
Delaware (USA)	N America	no	6	43	82	125	2.10037	0.52439	125		2.09691		4.8	13.9535	0.000930233	0.0193798	6450	3.80956			39.1581	39.1581	2025	http://www.odonatacentral.org
Denmark	Europe	no	2	20	40	60	1.78533	0.5	60		1.77815		3.33333	10	4.64102e-05	0.00139231	43094	4.63442			55.7167	55.7167	2022	Sandall, E. L., Pinkert, S., & Jetz, W. (2022). Country‐level checklists and occurrences for the world’s Odonata (dragonflies and damselflies). Journal of Biogeography, 49(8), 1586–1598. https://doi.org/10.1111/jbi.14457
Dinagat island (PHL)	SE Asia	yes	1	28	37	65	1.81954	0.756757		65		1.81291	1.53846	3.57143	0.000964934	0.0627207	1036.34	3.0155	939	4.54	10.1	10.1	2010	Hämäläinen, M., & Mueller, R. A. (1997). Synopsis of the Philippine Odonata, with lists of species recorded from forty islands. Odonatologica, 26, 249–315. / Villanueva, R. J. T. (2010). Adult Odonata community in Dinagat Island, the Philippines: Impact of Chromium ore mining on density and species composition. Odonatologica, 39(2), 133–140.
Djibouti	N Africa	no	2	2	8	10	1.04139	0.25	10		1		20	100	8.62069e-05	0.000431034	23200	4.36549			11.6	11.6	2022	Sandall, E. L., Pinkert, S., & Jetz, W. (2022). Country‐level checklists and occurrences for the world’s Odonata (dragonflies and damselflies). Journal of Biogeography, 49(8), 1586–1598. https://doi.org/10.1111/jbi.14457
Dominica	Caribean	yes	2	8	18	26	1.43136	0.444444		26		1.41497	7.69231	25	0.00266667	0.0346667	750	2.87506	1447	497.8	15.3	15.3	2022	Sandall, E. L., Pinkert, S., & Jetz, W. (2022). Country‐level checklists and occurrences for the world’s Odonata (dragonflies and damselflies). Journal of Biogeography, 49(8), 1586–1598. https://doi.org/10.1111/jbi.14457
Dumaran island (PHL)	SE Asia	yes	0	9	10	19	1.30103	0.9		19		1.27875	0	0	0	0.0590062	322	2.50786	127	146.84	10.53	10.53	1997	Hämäläinen, M., & Mueller, R. A. (1997). Synopsis of the Philippine Odonata, with lists of species recorded from forty islands. Odonatologica, 26, 249–315.
Ecuador	S America	no	3	215	211	426	2.63043	1.01896	426		2.62941		0.704225	1.39535	1.17018e-05	0.00166166	256370	5.40887			-0.22	0.22	2019	Mauffray, W. F., & Tennessen, K. J. (2019). A catalogue and historical study of the Odonata of Ecuador. Zootaxa, 4628(1), 1–265. https://doi.org/10.11646/zootaxa.4628.1.1
Egypt	N Africa	no	3	11	25	36	1.5682	0.44	36		1.5563		8.33333	27.2727	2.9691e-06	3.56292e-05	1010408	6.0045			30.0333	30.0333	2022	Sandall, E. L., Pinkert, S., & Jetz, W. (2022). Country‐level checklists and occurrences for the world’s Odonata (dragonflies and damselflies). Journal of Biogeography, 49(8), 1586–1598. https://doi.org/10.1111/jbi.14457
Eivissa (ESP)	Europe	yes	1	4	8	12	1.11394	0.5		12		1.07918	8.33333	25	0.00174948	0.0209937	571.6	2.75709	475	150	39.98	39.98	2022	Rebassa, M., & Canyelles, X. (2022). Actualització de l’estatus dels odonats de les Illes Balears. Un repàs a la seva situació des de començaments del segle XX fins a l’actualitat. Bolletí de La Societat d’Història Natural de Les Balears, 65, 97–115.
El Hierro (ESP)	Macaronesia	yes	0	0	3	3	0.60206	0		3		0.477121	0	#DIV/0!	0	0.0111728	268.51	2.42896	1501	386	27.75	27.75	2016	Weihrauch, F., Vieira, V., Cordero-Rivera, A., & de Santos Loureiro, N. (2016). Update on the zoogeography of Odonata in the Macaronesian Islands. Boletín ROLA, 8, 9–22.
El Salvador	C America	no	2	39	74	113	2.0569	0.527027	113		2.05308		1.76991	5.12821	9.50525e-05	0.00537047	21041	4.32307			13.7	13.7	2022	Sandall, E. L., Pinkert, S., & Jetz, W. (2022). Country‐level checklists and occurrences for the world’s Odonata (dragonflies and damselflies). Journal of Biogeography, 49(8), 1586–1598. https://doi.org/10.1111/jbi.14457
Eniwetok atoll (MHL)	Micronesia	yes	0	0	2	2	0.477121	0		2		0.30103	0	#DIV/0!	0	0.34188	5.85	0.767156	5	2572	11.5	11.5	1968	Jackson, W. B. (1968). Dragonfly Populations at Eniwetok Atoll. BioScience, 18(12), 1123. https://doi.org/10.2307/1294590
Equatorial Guinea	C Africa	no	1	39	66	105	2.02531	0.590909	105		2.02119		0.952381	2.5641	3.56506e-05	0.00374332	28050	4.44793			3.75	3.75	2022	Sandall, E. L., Pinkert, S., & Jetz, W. (2022). Country‐level checklists and occurrences for the world’s Odonata (dragonflies and damselflies). Journal of Biogeography, 49(8), 1586–1598. https://doi.org/10.1111/jbi.14457
Eritrea	E Africa	no	1	6	22	28	1.4624	0.272727	28		1.44716		3.57143	16.6667	8.33333e-06	0.000233333	120000	5.07918			15.3333	15.3333	2022	Sandall, E. L., Pinkert, S., & Jetz, W. (2022). Country‐level checklists and occurrences for the world’s Odonata (dragonflies and damselflies). Journal of Biogeography, 49(8), 1586–1598. https://doi.org/10.1111/jbi.14457
Española (Galápagos) (ECU)	Pacific Ocean	yes	0	0	2	2	0.477121	0		2		0.30103	0	#DIV/0!	0	0.0333333	60	1.77815	206	964	-1.38	1.38	2025	Peck, S. B. (2013). CDF Checklist of Galapagos Dragonflies and Damselflies. In F. Bungartz, H. Herrera, P. Jaramillo, N. Tirado, G. Jímenez-Uzcategui, D. Ruiz, A. Guézou, & F. Ziemmeck (Eds.), Charles Darwin Foundation Galapagos Species Checklist—Lista de Especies de Galápagos de la Fundación Charles Darwin (pp. 1–3). Charles Darwin Foundation / Fundación Charles Darwin. / https://datazone.darwin…
Espirito Santo (BRA)	S America	no	2	62	118	180	2.25768	0.525424	180		2.25527		1.11111	3.22581	4.34051e-05	0.00390646	46077.5	4.66349			-20.2975	20.2975	2005	Costa, J. M., & Oldrini, B. B. (2005). Diversidade e distribuição dos Odonata (Insecta) no estado do Espírito Santo, Brasil. Publicaçoes Avulsas Do Museu Nacional, 107, 1–15.
Estonia	Europe	no	2	23	41	64	1.81291	0.560976	64		1.80618		3.125	8.69565	4.4116e-05	0.00141171	45335	4.65643			59.4167	59.4167	2022	Sandall, E. L., Pinkert, S., & Jetz, W. (2022). Country‐level checklists and occurrences for the world’s Odonata (dragonflies and damselflies). Journal of Biogeography, 49(8), 1586–1598. https://doi.org/10.1111/jbi.14457
Eswatini	S Africa	no	1	25	40	65	1.81954	0.625	65		1.81291		1.53846	4	5.75904e-05	0.00374338	17364	4.23965			-26.5	26.5	2022	Sandall, E. L., Pinkert, S., & Jetz, W. (2022). Country‐level checklists and occurrences for the world’s Odonata (dragonflies and damselflies). Journal of Biogeography, 49(8), 1586–1598. https://doi.org/10.1111/jbi.14457
Ethiopia	E Africa	no	2	35	81	116	2.06819	0.432099	116		2.06446		1.72414	5.71429	1.8111e-06	0.000105044	1104300	6.04309			9.01667	9.01667	2022	Sandall, E. L., Pinkert, S., & Jetz, W. (2022). Country‐level checklists and occurrences for the world’s Odonata (dragonflies and damselflies). Journal of Biogeography, 49(8), 1586–1598. https://doi.org/10.1111/jbi.14457
European Russia (RUS)	Europe	no	2	28	52	80	1.90849	0.538462	80		1.90309		2.5	7.14286	5.77952e-07	2.31181e-05	3.4605e+06	6.53914			55	55	2019	Malikova, E. I., & Kosterin, O. E. (2019). Check-list of Odonata of the Russian Federation. Odonatologica, 48(1–2), 49–78. https://doi.org/10.5281/zenodo.2677689
Faial (PRT)	Macaronesia	yes	2	2	2	4	0.69897	1		4		0.60206	50	100	0.0115567	0.0231134	173.06	2.2382	1043	1661	38.5825	38.5825	2016	Weihrauch, F., Vieira, V., Cordero-Rivera, A., & de Santos Loureiro, N. (2016). Update on the zoogeography of Odonata in the Macaronesian Islands. Boletín ROLA, 8, 9–22.
Falkland Islands (Malvinas)	Atlantic ocean	yes	0	0	0	0	0	#DIV/0!		0			#DIV/0!	#DIV/0!	0	0	12173	4.0854	705	500	-51.6953	51.6953	2022	Sandall, E. L., Pinkert, S., & Jetz, W. (2022). Country‐level checklists and occurrences for the world’s Odonata (dragonflies and damselflies). Journal of Biogeography, 49(8), 1586–1598. https://doi.org/10.1111/jbi.14457
Faroe Islands (DNK)	N Atlantic	yes	0	1	1	2	0.477121	1		2		0.30103	0	0	0	0.00143575	1393	3.14395	882	655	62	62	2022	Sandall, E. L., Pinkert, S., & Jetz, W. (2022). Country‐level checklists and occurrences for the world’s Odonata (dragonflies and damselflies). Journal of Biogeography, 49(8), 1586–1598. https://doi.org/10.1111/jbi.14457
Fernando de Noronha (BRA)	S America	yes	1	1	4	5	0.778151	0.25		5		0.69897	20	100	0.0384615	0.192308	26	1.41497	111	354	-3.5	3.5	2020	Rafael, J. A., Limeira-de-Oliveira, F., Hutchings, R. W., Miranda, G. F. G., Silva Neto, A. M. D., Somavilla, A., Camargo, A., Asenjo, A., Pinto, Â. P., Bello, A. D. M., Dalmorra, C., Mello-Patiu, C. A. D., Carvalho, C. J. B. D., Takiya, D. M., Parizotto, D. R., Marques, D. W. A., Cavalheiro, D. D. O., Mendes, D. M. D. M., Zeppelini, D., … Fernandes, D. R. R. (2020). Insect (Hexapoda) diversity i…
Finland	Europe	no	2	19	43	62	1.79934	0.44186	62		1.79239		3.22581	10.5263	5.91462e-06	0.000183353	338145	5.5291			60.1708	60.1708	2022	Sandall, E. L., Pinkert, S., & Jetz, W. (2022). Country‐level checklists and occurrences for the world’s Odonata (dragonflies and damselflies). Journal of Biogeography, 49(8), 1586–1598. https://doi.org/10.1111/jbi.14457
Floreana (Galápagos) (ECU)	Pacific Ocean	yes	0	0	4	4	0.69897	0		4		0.60206	0	#DIV/0!	0	0.0231214	173	2.23805	640	1050	-1.2975	1.2975	2025	Peck, S. B. (2013). CDF Checklist of Galapagos Dragonflies and Damselflies. In F. Bungartz, H. Herrera, P. Jaramillo, N. Tirado, G. Jímenez-Uzcategui, D. Ruiz, A. Guézou, & F. Ziemmeck (Eds.), Charles Darwin Foundation Galapagos Species Checklist—Lista de Especies de Galápagos de la Fundación Charles Darwin (pp. 1–3). Charles Darwin Foundation / Fundación Charles Darwin. / https://datazone.darwin…
Flores (PRT)	Macaronesia	yes	2	2	2	4	0.69897	1		4		0.60206	50	100	0.0141824	0.0283648	141.02	2.14928	915	1865	39.4436	39.4436	2016	Weihrauch, F., Vieira, V., Cordero-Rivera, A., & de Santos Loureiro, N. (2016). Update on the zoogeography of Odonata in the Macaronesian Islands. Boletín ROLA, 8, 9–22.
Flores island (IDN)	SE Asia	yes	0	18	35	53	1.73239	0.514286		53		1.72428	0	0	0	0.00359769	14731.7	4.16825	2370	302	-8.67472	8.67472	2024	Dow, R. A., Choong, C. Y., Grinang, J., Lupiyaningdyah, P., Ngiam, R. W. J., & Kalkman, V. J. (2024). Checklist of the Odonata (Insecta) of Sundaland and Wallacea (Malaysia, Singapore, Brunei, Indonesia and Timor Leste). Zootaxa, 5460(1), 1–122. https://doi.org/10.11646/zootaxa.5460.1.1
Florida (USA)	N America	no	5	47	124	171	2.23553	0.379032	171		2.233		2.92398	10.6383	2.93579e-05	0.00100404	170312	5.23125			30.4383	30.4383	2025	http://www.odonatacentral.org
Formentera (ESP)	Europe	yes	1	1	3	4	0.69897	0.333333		4		0.60206	25	100	0.0120135	0.0480538	83.24	1.92033	119	99.5	38.7	38.7	2022	Rebassa, M., & Canyelles, X. (2022). Actualització de l’estatus dels odonats de les Illes Balears. Un repàs a la seva situació des de començaments del segle XX fins a l’actualitat. Bolletí de La Societat d’Història Natural de Les Balears, 65, 97–115.
France	Europe	no	4	35	58	93	1.97313	0.603448	93		1.96848		4.30108	11.4286	7.35374e-06	0.000170974	543941	5.73555			48.85	48.85	2006	Grand, D., & Boudot, J. P. (2006). Les Libellules de France, Belgique et Louxembourg. Mèze: Biotope.
French Guiana (FRA)	S America	no	4	77	172	249	2.39794	0.447674	249		2.3962		1.60643	5.19481	4.7619e-05	0.00296429	84000	4.92428			3.9339	3.9339	2022	Sandall, E. L., Pinkert, S., & Jetz, W. (2022). Country‐level checklists and occurrences for the world’s Odonata (dragonflies and damselflies). Journal of Biogeography, 49(8), 1586–1598. https://doi.org/10.1111/jbi.14457
French Polynesia (FRA)	Polynesia	yes	6	9	13	22	1.36173	0.692308		22		1.34242	27.2727	66.6667	0.00143988	0.00527958	4167	3.61982	2241	3250	-17.5667	17.5667	2022	Sandall, E. L., Pinkert, S., & Jetz, W. (2022). Country‐level checklists and occurrences for the world’s Odonata (dragonflies and damselflies). Journal of Biogeography, 49(8), 1586–1598. https://doi.org/10.1111/jbi.14457
Fuerteventura (ESP)	Macaronesia	yes	1	1	10	11	1.07918	0.1		11		1.04139	9.09091	100	0.000602504	0.00662754	1659.74	3.22004	807	101	28.4	28.4	2016	Weihrauch, F., Vieira, V., Cordero-Rivera, A., & de Santos Loureiro, N. (2016). Update on the zoogeography of Odonata in the Macaronesian Islands. Boletín ROLA, 8, 9–22.
Futuna (FRA)	Oceania	yes	1	2	8	10	1.04139	0.25		10		1	10	50	0.0125	0.125	80	1.90309	524	275	-14.275	14.275	2021	Marinov, M., Jacquier, R. K., Duvernay, J. M., Gorlier, J. V., Mary, N., Doscher, C., Bail, F. L., Jourdan, H., & Theuerkauf, J. (2021). An update of the Odonata fauna of Wallis & Futuna (Insecta: Odonata). Faunistic Studies in South-East Asian and Pacific Island Odonata, 35, 35–67.
Gabon	C Africa	no	1	101	174	275	2.44091	0.58046	275		2.43933		0.363636	0.990099	3.73597e-06	0.00102739	267668	5.4276			0.383333	0.383333	2022	Sandall, E. L., Pinkert, S., & Jetz, W. (2022). Country‐level checklists and occurrences for the world’s Odonata (dragonflies and damselflies). Journal of Biogeography, 49(8), 1586–1598. https://doi.org/10.1111/jbi.14457
Gambia	W Africa	no	1	26	64	90	1.95904	0.40625	90		1.95424		1.11111	3.84615	8.84956e-05	0.0079646	11300	4.05308			13.45	13.45	2022	Sandall, E. L., Pinkert, S., & Jetz, W. (2022). Country‐level checklists and occurrences for the world’s Odonata (dragonflies and damselflies). Journal of Biogeography, 49(8), 1586–1598. https://doi.org/10.1111/jbi.14457
Georgia	Europe	no	3	26	45	71	1.85733	0.577778	71		1.85126		4.22535	11.5385	4.30416e-05	0.00101865	69700	4.84323			41.7167	41.7167	2021	Boudot, Jean-Pierre, Borisov, Sergey, De Knijf, G., Van Grunsven, R. H. A., Schröter, A., & Kalkman, V. J. (2021). Atlas of the dragonflies and damselflies of West and Central Asia. 22 supplement, 1–247.
Georgia (USA)	N America	no	6	53	126	179	2.25527	0.420635	179		2.25285		3.35196	11.3208	3.89841e-05	0.00116302	153909	5.18726			33.7489	33.7489	2025	http://www.odonatacentral.org
Germany	Europe	no	2	33	53	86	1.93952	0.622642	86		1.9345		2.32558	6.06061	5.5929e-06	0.000240495	357596	5.55339			52.5167	52.5167	2022	Sandall, E. L., Pinkert, S., & Jetz, W. (2022). Country‐level checklists and occurrences for the world’s Odonata (dragonflies and damselflies). Journal of Biogeography, 49(8), 1586–1598. https://doi.org/10.1111/jbi.14457
Ghana	W Africa	no	1	62	127	189	2.27875	0.488189	189		2.27646		0.529101	1.6129	4.16667e-06	0.0007875	240000	5.38021			5.555	5.555	2022	Sandall, E. L., Pinkert, S., & Jetz, W. (2022). Country‐level checklists and occurrences for the world’s Odonata (dragonflies and damselflies). Journal of Biogeography, 49(8), 1586–1598. https://doi.org/10.1111/jbi.14457
Glorieuse islands	E Africa	yes	0	0	2	2	0.477121	0		2		0.30103	0	#DIV/0!	0	0.4	5	0.69897	1	180	-11.55	11.55	2021	Dijkstra, K.-D. B., & Cohen, C. (2021). Libellules et demoiselles de Madagascar et des iles d l’Ouest de l’Ocean Indien / Dragonflies and damselflies of Madagascar and the Western Indian Ocean islands. Association Vahatra.
Gökçeada Island (TUR)	Europe	yes	2	12	17	29	1.47712	0.705882		29		1.4624	6.89655	16.6667	0.0071623	0.103853	279.24	2.44598	673	17.6	40.1608	40.1608	2006	Hacet, N., & Aktaç, N. (2006). The odonata of Gökçeada island, Turkey: A biogeographical assessment. Entomological News, 117(4), 357–368. https://doi.org/10.3157/0013-872X(2006)117[357:TOOGIT]2.0.CO;2
Graciosa (PRT)	Macaronesia	yes	1	1	2	3	0.60206	0.5		3		0.477121	33.3333	100	0.016488	0.0494641	60.65	1.78283	375	1600	39.0514	39.0514	2016	Weihrauch, F., Vieira, V., Cordero-Rivera, A., & de Santos Loureiro, N. (2016). Update on the zoogeography of Odonata in the Macaronesian Islands. Boletín ROLA, 8, 9–22.
Gran Canaria (ESP)	Macaronesia	yes	1	1	10	11	1.07918	0.1		11		1.04139	9.09091	100	0.00064098	0.00705078	1560.11	3.19316	1956	199	27.9667	27.9667	2016	Weihrauch, F., Vieira, V., Cordero-Rivera, A., & de Santos Loureiro, N. (2016). Update on the zoogeography of Odonata in the Macaronesian Islands. Boletín ROLA, 8, 9–22.
Grande Comore island	E Africa	yes	1	2	10	12	1.11394	0.2		12		1.07918	8.33333	50	0.00097561	0.0117073	1025	3.01072	2361	294	-11.5833	11.5833	2021	Dijkstra, K.-D. B., & Cohen, C. (2021). Libellules et demoiselles de Madagascar et des iles d l’Ouest de l’Ocean Indien / Dragonflies and damselflies of Madagascar and the Western Indian Ocean islands. Association Vahatra.
Great Britain (GBR)	Europe	yes	2	16	26	42	1.63347	0.615385		42		1.62325	4.7619	12.5	9.55425e-06	0.000200639	209331	5.32083	1345	34	54	54	2004	Smallshire, D., & Swash, A. (2004). Britain’s dragonflies. Hampshire: WildGuides.
Greece	Europe	no	2	26	50	76	1.88649	0.52	76		1.88081		2.63158	7.69231	1.51711e-05	0.0005765	131830	5.12001			37.9667	37.9667	2022	Sandall, E. L., Pinkert, S., & Jetz, W. (2022). Country‐level checklists and occurrences for the world’s Odonata (dragonflies and damselflies). Journal of Biogeography, 49(8), 1586–1598. https://doi.org/10.1111/jbi.14457
Greenland (DNK)	N Atlantic	no	0	0	0	0	0	#DIV/0!	0				#DIV/0!	#DIV/0!	0	0	2166086	6.33568	3700	432	64.1667	64.1667	2022	Sandall, E. L., Pinkert, S., & Jetz, W. (2022). Country‐level checklists and occurrences for the world’s Odonata (dragonflies and damselflies). Journal of Biogeography, 49(8), 1586–1598. https://doi.org/10.1111/jbi.14457
Grenada	Caribean	yes	1	5	17	22	1.36173	0.294118		22		1.34242	4.54545	20	0.00290698	0.0639535	344	2.53656	870	137.6	12.0539	12.0539	2022	Sandall, E. L., Pinkert, S., & Jetz, W. (2022). Country‐level checklists and occurrences for the world’s Odonata (dragonflies and damselflies). Journal of Biogeography, 49(8), 1586–1598. https://doi.org/10.1111/jbi.14457
Guadeloupe (FRA)	Caribean	yes	3	10	30	40	1.61278	0.333333		40		1.60206	7.5	30	0.00184275	0.02457	1628	3.21165	1467	574.9	16.25	16.25	2022	Sandall, E. L., Pinkert, S., & Jetz, W. (2022). Country‐level checklists and occurrences for the world’s Odonata (dragonflies and damselflies). Journal of Biogeography, 49(8), 1586–1598. https://doi.org/10.1111/jbi.14457
Guam (USA)	Micronesia	yes	1	2	13	15	1.20412	0.153846		15		1.17609	6.66667	50	0.00185185	0.0277778	540	2.73239	407	1805	13.4792	13.4792	2022	Sandall, E. L., Pinkert, S., & Jetz, W. (2022). Country‐level checklists and occurrences for the world’s Odonata (dragonflies and damselflies). Journal of Biogeography, 49(8), 1586–1598. https://doi.org/10.1111/jbi.14457
Guangdong (CHI)	E Asia	no	2	79	121	200	2.3032	0.652893	200		2.30103		1	2.53165	1.11235e-05	0.00111235	179800	5.25479			23.4	23.4	2007	Wilson, K. D. P., & Zaifu, X. (2007). Odonata of Guangdong, Hong Kong and Macau, South China, part 1: Zygoptera. International Journal of Odonatology, 10(1), 87–128. / Wilson, K. D. P., & Xu, Z. (2009). Gomphidae of Guangdong & Hong Kong, China (Odonata: Anisoptera). Zootaxa, 2177, 1–62. / Wilson, K. D. P., & Xu, Z. (2008). Aeshnidae of Guangdong and Hong Kong (China), with the descriptions of th…
Guangxi Zhuang Autonomous Region (CHI)	E Asia	no	2	74	128	256	2.40993	0.578125	256		2.40824		0.78125	2.7027	8.41751e-06	0.00107744	237600	5.37585			23.6	23.6	2012	Wilson, K. D. P., & Reels, G. T. (2003). Odonata of Guangxi Zhuang Autonomous Region, China, part I: Zygoptera. Odonatologica, 32(3), 237–279./ Wilson, K. D. P. (2012). Odonata of Guangxi Zhuang Autonomous Region, China, part II: Anisoptera. International Journal of Odonatology, 8(1), 37–41.
Guatemala	C America	no	5	88	126	214	2.33244	0.698413	214		2.33041		2.33645	5.68182	4.59183e-05	0.0019653	108889	5.03698			14.6333	14.6333	2022	Sandall, E. L., Pinkert, S., & Jetz, W. (2022). Country‐level checklists and occurrences for the world’s Odonata (dragonflies and damselflies). Journal of Biogeography, 49(8), 1586–1598. https://doi.org/10.1111/jbi.14457
Guernsey	Europe	yes	1	4	11	15	1.20412	0.363636		15		1.17609	6.66667	25	0.016129	0.241935	62	1.79239	114	43	49.46	49.46	2022	Sandall, E. L., Pinkert, S., & Jetz, W. (2022). Country‐level checklists and occurrences for the world’s Odonata (dragonflies and damselflies). Journal of Biogeography, 49(8), 1586–1598. https://doi.org/10.1111/jbi.14457
Guinea	W Africa	no	1	44	92	136	2.13672	0.478261	136		2.13354		0.735294	2.27273	4.06741e-06	0.000553167	245857	5.39068			9.51667	9.51667	2022	Sandall, E. L., Pinkert, S., & Jetz, W. (2022). Country‐level checklists and occurrences for the world’s Odonata (dragonflies and damselflies). Journal of Biogeography, 49(8), 1586–1598. https://doi.org/10.1111/jbi.14457
Guinea-Bissau	W Africa	no	1	24	68	92	1.96848	0.352941	92		1.96379		1.08696	4.16667	2.76817e-05	0.00254671	36125	4.55781			11.8667	11.8667	2022	Sandall, E. L., Pinkert, S., & Jetz, W. (2022). Country‐level checklists and occurrences for the world’s Odonata (dragonflies and damselflies). Journal of Biogeography, 49(8), 1586–1598. https://doi.org/10.1111/jbi.14457
Gujarat (central) (IND)	S Asia	no	4	16	26	42	1.63347	0.615385	42		1.62325		9.52381	25	0.000128613	0.00135044	31101	4.49277			23.0225	23.0225	2015	Rohmare, V. B., Rathod, D. M., Dholu, S. G., Parasharya, B. M., & Talmale, S. S. (2015). An inventory of odonates of central Gujarat, India. Journal of Threatened Taxa, 7(11), 7805–7811. https://doi.org/10.11609/JoTT.o4292.7805-11
Gujarat (southern) (IND)	S Asia	no	4	21	39	60	1.78533	0.538462	60		1.77815		6.66667	19.0476	0.000178659	0.00267989	22389	4.35003			23.22	23.22	2016	Rathod, D. M., Parasharya, B. M., & Talmale, S. S. (2016). Odonata (Insecta) diversity of southern Gujarat, India. Journal of Threatened Taxa, 8(11), 9339. https://doi.org/10.11609/jott.2609.8.11.9339-9349
Guyana	S America	no	2	117	159	276	2.44248	0.735849	276		2.44091		0.724638	1.7094	9.30367e-06	0.00128391	214969	5.33238			6.80111	6.80111	2022	Sandall, E. L., Pinkert, S., & Jetz, W. (2022). Country‐level checklists and occurrences for the world’s Odonata (dragonflies and damselflies). Journal of Biogeography, 49(8), 1586–1598. https://doi.org/10.1111/jbi.14457
Hainan (CHI)	SE Asia	yes	2	56	109	165	2.22011	0.513761		165		2.21748	1.21212	3.57143	5.68327e-05	0.0046887	35191	4.54643	1840	20	19.2	19.2	2015	Reels, G. T., & Zhang, H. (2015). A Field guide to the dragonflies of Hainan. Huayu Nature Book Trade Co. Ltd.
Halmahera (IDN)	SE Asia	yes	0	21	41	62	1.79934	0.512195		62		1.79239	0	0	0	0.00348706	17780	4.24993	1560	202	0.65	0.65	2024	Dow, R. A., Choong, C. Y., Grinang, J., Lupiyaningdyah, P., Ngiam, R. W. J., & Kalkman, V. J. (2024). Checklist of the Odonata (Insecta) of Sundaland and Wallacea (Malaysia, Singapore, Brunei, Indonesia and Timor Leste). Zootaxa, 5460(1), 1–122. https://doi.org/10.11646/zootaxa.5460.1.1
Havelock island (IND)	Indian Ocean	yes	0	8	19	27	1.44716	0.421053		27		1.43136	0	0	0	0.292842	92.2	1.96473	167	16.85	11.96	11.96	2015	Sivaperuman, C. (2015). Odonata of Andaman and Nicobar Islands, India. In Aquatic Ecosystem: Biodiversity, Ecology and Conservation (pp. 153–162). https://doi.org/10.1007/978-81-322-2178-4
Hawaii (USA)	Polynesia	yes	2	29	8	37	1.57978	3.625		37		1.5682	5.40541	6.89655	7.06439e-05	0.00130691	28311	4.45196	4205	3200	21.3069	21.3069	2000	Daigle, J. J. (2000). The distribution of the Odonata of Hawaii. Bulletin of American Odonatology, 6(1), 1–5.
Heard Island and McDonald Islands (AUS)	Antarctica	yes	0	0	0	0	0	#DIV/0!		0			#DIV/0!	#DIV/0!	0	0	368	2.56585	2745	3850	-53.1	53.1	2022	Sandall, E. L., Pinkert, S., & Jetz, W. (2022). Country‐level checklists and occurrences for the world’s Odonata (dragonflies and damselflies). Journal of Biogeography, 49(8), 1586–1598. https://doi.org/10.1111/jbi.14457
Henan (CHI)	E Asia	no	8	263	221	484	2.68574	1.19005	484		2.68485		1.65289	3.04183	4.79042e-05	0.0028982	167000	5.22272			34.764	34.764	2007	Zhigu, W. (2007). The fauna dragonflies of Henan. Odonata. Henan Science and Technology Press.
Henry Lawrence island (IND)	Indian Ocean	yes	0	2	10	12	1.11394	0.2		12		1.07918	0	0	0	0.219378	54.7	1.73799	137	9.47	12.15	12.15	2015	Sivaperuman, C. (2015). Odonata of Andaman and Nicobar Islands, India. In Aquatic Ecosystem: Biodiversity, Ecology and Conservation (pp. 153–162). https://doi.org/10.1007/978-81-322-2178-4
Hispaniola (DOM+HTI)	Caribean	yes	3	19	47	66	1.82607	0.404255		66		1.81954	4.54545	15.7895	3.92259e-05	0.000862971	76480	4.88355	3175	572	19	19	2024	https://www.pugetsound.edu/puget-sound-museum-natural-history/biodiversity-resources/insects/dragonflies/world-odonata-list/west-indian-odonata
Homonhon island (PHL)	SE Asia	yes	0	17	30	47	1.68124	0.566667		47		1.6721	0	0	0	0.446768	105.2	2.02202	374	24.15	10.7556	10.7556	1997	Hämäläinen, M., & Mueller, R. A. (1997). Synopsis of the Philippine Odonata, with lists of species recorded from forty islands. Odonatologica, 26, 249–315.
Honduras	C America	no	3	79	97	176	2.24797	0.814433	176		2.24551		1.70455	3.79747	2.66686e-05	0.00156456	112492	5.05112			14.1	14.1	2022	Sandall, E. L., Pinkert, S., & Jetz, W. (2022). Country‐level checklists and occurrences for the world’s Odonata (dragonflies and damselflies). Journal of Biogeography, 49(8), 1586–1598. https://doi.org/10.1111/jbi.14457
Hong Kong (CHI)	E Asia	no	3	38	90	128	2.11059	0.422222	128		2.10721		2.34375	7.89474	0.00108894	0.0464615	2754.97	3.44012			22.2808	22.2808	2019	Reels, G. T. (2019). An annotated check list of Hong Kong dragonflies and assessment of their local conservation significance. Faunistic Studies in South-East Asian and Pacific Island Odonata, 30, 1–49.
Huizhou (CHI)	E Asia	no	2	47	127	174	2.24304	0.370079	174		2.24055		1.14943	4.25532	0.000183117	0.0159311	10922	4.0383			23.112	23.112	2012	Hongdao, W. (2012). Huizhou dragonflies. China Forestry Publishing House.
Hungary	Europe	no	2	24	43	67	1.83251	0.55814	67		1.82607		2.98507	8.33333	2.14984e-05	0.000720198	93030	4.96862			47.4333	47.4333	2022	Sandall, E. L., Pinkert, S., & Jetz, W. (2022). Country‐level checklists and occurrences for the world’s Odonata (dragonflies and damselflies). Journal of Biogeography, 49(8), 1586–1598. https://doi.org/10.1111/jbi.14457 / Seehausen, M. (2014). New to the fauna of Hong Kong: Matrona basilaris Selys, 1853 (Odonata: Calopterygidae). International Dragonfly Fund - Report, 65, 3–5.
Iceland	Artic ocean	yes	0	0	1	1	0.30103	0		1		0	0	#DIV/0!	0	9.69697e-06	103125	5.01336	2110	750	64.1333	64.1333	2022	Sandall, E. L., Pinkert, S., & Jetz, W. (2022). Country‐level checklists and occurrences for the world’s Odonata (dragonflies and damselflies). Journal of Biogeography, 49(8), 1586–1598. https://doi.org/10.1111/jbi.14457 / Seehausen, M. (2014). New to the fauna of Hong Kong: Matrona basilaris Selys, 1853 (Odonata: Calopterygidae). International Dragonfly Fund - Report, 65, 3–5.
Idaho (USA)	N America	no	3	24	58	82	1.91908	0.413793	82		1.91381		3.65854	12.5	1.38604e-05	0.000378851	216444	5.33535			43.6158	43.6158	2025	http://www.odonatacentral.org
Ilhas Desertas (PRT)	Macaronesia	yes	0	0	2	2	0.477121	0		2		0.30103	0	#DIV/0!	0	0.140746	14.21	1.15259	18	611	32.5095	32.5095	2016	Weihrauch, F., Vieira, V., Cordero-Rivera, A., & de Santos Loureiro, N. (2016). Update on the zoogeography of Odonata in the Macaronesian Islands. Boletín ROLA, 8, 9–22.
Ilhas Selvagens (PRT)	Macaronesia	yes	0	0	2	2	0.477121	0		2		0.30103	0	#DIV/0!	0	0.732601	2.73	0.436163	163	367	30.1529	30.1529	2016	Weihrauch, F., Vieira, V., Cordero-Rivera, A., & de Santos Loureiro, N. (2016). Update on the zoogeography of Odonata in the Macaronesian Islands. Boletín ROLA, 8, 9–22.
Illinois (USA)	N America	no	5	48	103	151	2.18184	0.466019	151		2.17898		3.31126	10.4167	3.3334e-05	0.00100669	149997	5.17608			39.7975	39.7975	2025	http://www.odonatacentral.org
Indiana (USA)	N America	no	5	48	103	151	2.18184	0.466019	151		2.17898		3.31126	10.4167	5.30105e-05	0.00160092	94321	4.97461			39.7686	39.7686	2025	http://www.odonatacentral.org
Inglis island (IND)	Indian Ocean	yes	0	2	3	5	0.778151	0.666667		5		0.69897	0	0	0	3.01205	1.66	0.220108	2	14	12.14	12.14	2015	Sivaperuman, C. (2015). Odonata of Andaman and Nicobar Islands, India. In Aquatic Ecosystem: Biodiversity, Ecology and Conservation (pp. 153–162). https://doi.org/10.1007/978-81-322-2178-4
Iowa (USA)	N America	no	4	45	82	127	2.10721	0.54878	127		2.1038		3.14961	8.88889	2.7445e-05	0.000871379	145746	5.1636			41.5908	41.5908	2025	http://www.odonatacentral.org
Irakleia (GRC)	Europe	yes	1	1	4	5	0.778151	0.25		5		0.69897	20	100	0.0561956	0.280978	17.795	1.2503	418	151	36.8333	36.8333	2018	Gavalas, I., Salteri, A., & Alexiou, S. (2018). The Odonata fauna of Náxos and Iraklia Islands, Greece. Libellula, 37(3/4), 181–186.
Iran	N Africa	no	9	38	62	100	2.00432	0.612903	100		2		9	23.6842	5.46052e-06	6.06724e-05	1648195	6.21701			35.6833	35.6833	2021	Boudot, Jean-Pierre, Borisov, Sergey, De Knijf, G., Van Grunsven, R. H. A., Schröter, A., & Kalkman, V. J. (2021). Atlas of the dragonflies and damselflies of West and Central Asia. 22 supplement, 1–247.
Iraq	W Asia	no	4	12	32	44	1.65321	0.375	44		1.64345		9.09091	33.3333	9.12582e-06	0.000100384	438317	5.64179			33.3333	33.3333	2021	Boudot, Jean-Pierre, Borisov, Sergey, De Knijf, G., Van Grunsven, R. H. A., Schröter, A., & Kalkman, V. J. (2021). Atlas of the dragonflies and damselflies of West and Central Asia. 22 supplement, 1–247.
Ireland	Europe	yes	2	11	18	29	1.47712	0.611111		29		1.4624	6.89655	18.1818	2.36908e-05	0.000343516	84421	4.92645	1039	380	53	53	2015	Boudot, J.-P., & Kalkman, V. J. (2015). Atlas of the European dragonflies and damselflies. KNNV Publishing.
Isabela (Galápagos) (ECU)	Pacific Ocean	yes	1	1	7	8	0.954243	0.142857		8		0.90309	12.5	100	0.000218055	0.00174444	4586	3.66143	1707	1100	-0.5	0.5	2025	Peck, S. B. (2013). CDF Checklist of Galapagos Dragonflies and Damselflies. In F. Bungartz, H. Herrera, P. Jaramillo, N. Tirado, G. Jímenez-Uzcategui, D. Ruiz, A. Guézou, & F. Ziemmeck (Eds.), Charles Darwin Foundation Galapagos Species Checklist—Lista de Especies de Galápagos de la Fundación Charles Darwin (pp. 1–3). Charles Darwin Foundation / Fundación Charles Darwin. / https://datazone.darwin…
Isle of Man	Europe	yes	1	4	12	16	1.23045	0.333333		16		1.20412	6.25	25	0.00174216	0.0278746	574	2.75891	620	56	54.15	54.15	2022	Sandall, E. L., Pinkert, S., & Jetz, W. (2022). Country‐level checklists and occurrences for the world’s Odonata (dragonflies and damselflies). Journal of Biogeography, 49(8), 1586–1598. https://doi.org/10.1111/jbi.14457
Israel	W Asia	no	5	24	41	65	1.81954	0.585366	65		1.81291		7.69231	20.8333	0.000240732	0.00312951	20770	4.31744			31.7833	31.7833	2021	Boudot, Jean-Pierre, Borisov, Sergey, De Knijf, G., Van Grunsven, R. H. A., Schröter, A., & Kalkman, V. J. (2021). Atlas of the dragonflies and damselflies of West and Central Asia. 22 supplement, 1–247.
Italy	Europe	no	3	30	52	82	1.91908	0.576923	82		1.91381		3.65854	10	1.19268e-05	0.000325998	251535	5.4006			41.9	41.9	2023	La Porta, G., Landi, F., Leandri, F., & Assandri, G. (2023). The new Checklist of the Italian Fauna: Odonata. Biogeographia – The Journal of Integrative Biogeography, 38(1), ucl009. https://doi.org/10.21426/B638158781
Itbayat island (PHL)	SE Asia	yes	0	3	6	9	1	0.5		9		0.954243	0	0	0	0.108264	83.13	1.91976	991	159.96	20.7878	20.7878	2009	Villanueva, R. J. T. (2009). Dragonflies of Babuyam and Batanes group of islands, Philippines (Insecta: Odonata). IDF-Report, 17, 1–16.
Jamaica	Caribean	yes	3	18	50	68	1.83885	0.36		68		1.83251	4.41176	16.6667	0.000272951	0.00618688	10991	4.04104	2256	668	17.9714	17.9714	2022	Sandall, E. L., Pinkert, S., & Jetz, W. (2022). Country‐level checklists and occurrences for the world’s Odonata (dragonflies and damselflies). Journal of Biogeography, 49(8), 1586–1598. https://doi.org/10.1111/jbi.14457
Japan	E Asia	yes	5	61	147	209	2.32222	0.414966		209		2.32015	2.39234	8.19672	1.32284e-05	0.000552947	377975	5.57746	3776	200	35.6833	35.6833	2022	Sandall, E. L., Pinkert, S., & Jetz, W. (2022). Country‐level checklists and occurrences for the world’s Odonata (dragonflies and damselflies). Journal of Biogeography, 49(8), 1586–1598. https://doi.org/10.1111/jbi.14457
Java (IDN)	SE Asia	yes	2	57	105	162	2.21219	0.542857		162		2.20952	1.23457	3.50877	1.50831e-05	0.00122173	132599	5.12254	3678	28.34	-7.33333	7.33333	2024	Dow, R. A., Choong, C. Y., Grinang, J., Lupiyaningdyah, P., Ngiam, R. W. J., & Kalkman, V. J. (2024). Checklist of the Odonata (Insecta) of Sundaland and Wallacea (Malaysia, Singapore, Brunei, Indonesia and Timor Leste). Zootaxa, 5460(1), 1–122. https://doi.org/10.11646/zootaxa.5460.1.1
Jersey	Europe	yes	1	7	9	17	1.25527	0.777778		17		1.23045	5.88235	14.2857	0.0083612	0.14214	119.6	2.07773	143	23	49.19	49.19	2022	Sandall, E. L., Pinkert, S., & Jetz, W. (2022). Country‐level checklists and occurrences for the world’s Odonata (dragonflies and damselflies). Journal of Biogeography, 49(8), 1586–1598. https://doi.org/10.1111/jbi.14457
John Lawrence island (IND)	Indian Ocean	yes	0	7	9	16	1.23045	0.777778		16		1.20412	0	0	0	0.45977	34.8	1.54158	97	15	12.1	12.1	2015	Sivaperuman, C. (2015). Odonata of Andaman and Nicobar Islands, India. In Aquatic Ecosystem: Biodiversity, Ecology and Conservation (pp. 153–162). https://doi.org/10.1007/978-81-322-2178-4
Jolo island (PHL)	SE Asia	yes	1	9	9	18	1.27875	1		18		1.25527	5.55556	11.1111	0.00115075	0.0207135	869	2.93902	803	192.59	5.97306	5.97306	2012	Villanueva, R. J. T., & Cahilog, H. (2012). Notes on a small Odonata collection from Tawi-Tawi, Sanga-Sanga and Jolo islands, Philippines. International Dragonfly Fund - Report, 55, 1–32.
Jomalig island (PHL)	SE Asia	yes	1	2	6	8	0.954243	0.333333		8		0.90309	12.5	50	0.0176523	0.141218	56.65	1.7532	96	60.78	14.696	14.696	2020	Villanueva, R. J. T., & Estacio, R. D. (2020). The Odonata collected in October 2019 on Patnanungan Island, Jomalig Island and Panukulan (northeastern Polillo), Philippines, with a checklist of the Polillo Odonata fauna. IDF-Report, 151, 1–21.
Jordan	N Africa	no	5	12	32	44	1.65321	0.375	44		1.64345		11.3636	41.6667	5.59647e-05	0.00049249	89342	4.95106	50		31.95	31.95	2021	Boudot, Jean-Pierre, Borisov, Sergey, De Knijf, G., Van Grunsven, R. H. A., Schröter, A., & Kalkman, V. J. (2021). Atlas of the dragonflies and damselflies of West and Central Asia. 22 supplement, 1–247.
Kadavu (FJI)	Melanesia	yes	1	9	5	14	1.17609	1.8		14		1.14613	7.14286	11.1111	0.00243309	0.0340633	411	2.61384	805	75	-19.05	19.05	2024	Donnelly, T. W., & Marinov, M. (2024). The Fijian genus Nesobasis Selys, 1891 Part 2: Revision in comparison to Nikoulabasis Ferguson et al., 2023 with particular emphasis on Vanua Levu, Taveuni, Koro and erection of 10 new species and one subspecies (Odonata: Coenagrionidae). Megataxa, 14(1), 1–266. https://doi.org/10.11646/megataxa.14.1.1 / Marinov, M., & Rashni, B. (2023). Contribution to the …
Kansas (USA)	N America	no	9	45	86	131	2.12057	0.523256	131		2.11727		6.87023	20	4.22337e-05	0.000614735	213100	5.32858			39.0347	39.0347	2025	http://www.odonatacentral.org
Karimganj District (IND)	S Asia	no	3	49	65	114	2.0607	0.753846	114		2.0569		2.63158	6.12245	0.00165837	0.0630182	1809	3.25744			24.8667	24.8667	2022	Joshi, S., Gassah, R., & Ismavel, V. A. (2022). Dragonflies and damselflies (Insecta: Odonata) of Karimganj District, Assam, India with four additions to the Indian checklist. Oriental Insects, 56(3), 299–327. https://doi.org/10.1080/00305316.2021.1982787
Kazakhstan	C Asia	no	5	29	58	87	1.94448	0.5	87		1.93952		5.74713	17.2414	1.83493e-06	3.19278e-05	2724900	6.43535			51.1667	51.1667	2022	Sandall, E. L., Pinkert, S., & Jetz, W. (2022). Country‐level checklists and occurrences for the world’s Odonata (dragonflies and damselflies). Journal of Biogeography, 49(8), 1586–1598. https://doi.org/10.1111/jbi.14457
Kentucky (USA)	N America	no	5	48	107	155	2.19312	0.448598	155		2.19033		3.22581	10.4167	4.77756e-05	0.00148104	104656	5.01976			38.2	38.2	2025	http://www.odonatacentral.org
Kenya	E Africa	no	1	68	138	206	2.31597	0.492754	206		2.31387		0.485437	1.47059	1.7163e-06	0.000353557	582650	5.76541			-1.28333	1.28333	2022	Sandall, E. L., Pinkert, S., & Jetz, W. (2022). Country‐level checklists and occurrences for the world’s Odonata (dragonflies and damselflies). Journal of Biogeography, 49(8), 1586–1598. https://doi.org/10.1111/jbi.14457
Kerala (IND)	S Asia	no	2	74	100	174	2.24304	0.74	174		2.24055		1.14943	2.7027	5.14628e-05	0.00447727	38863	4.58954			10	10	2022	Gopalan, S. V., Sherif, M., & Chandran, A. V. (2022). A checklist of dragonflies & damselflies (Insecta: Odonata) of Kerala, India. Journal of Threatened Taxa, 14(2), 20654–20665. https://doi.org/10.11609/jott.7504.14.2.20654-20665
Kermadec islands (NZL)	Oceania	yes	1	1	4	5	0.778151	0.25		5		0.69897	20	100	0.0297619	0.14881	33.6	1.52634	516	900	-29.2769	29.2769	1973	Armstrong, J. S. (1973). Odonata of the Kermadec Islands. New Zealand Entomologist, 5(3), 277–283. doi:10.1080/00779962.1973.9723022
Kiribati	Micronesia	yes	0	0	4	4	0.69897	0		4		0.60206	0	#DIV/0!	0	0.00493103	811.19	2.90912	3.5	2955	1.46667	1.46667	2022	Sandall, E. L., Pinkert, S., & Jetz, W. (2022). Country‐level checklists and occurrences for the world’s Odonata (dragonflies and damselflies). Journal of Biogeography, 49(8), 1586–1598. https://doi.org/10.1111/jbi.14457
Korea, Democratic People's Republic of	E Asia	no	2	12	33	45	1.66276	0.363636	45		1.65321		4.44444	16.6667	1.65923e-05	0.000373326	120538	5.08112			39.0333	39.0333	2022	Sandall, E. L., Pinkert, S., & Jetz, W. (2022). Country‐level checklists and occurrences for the world’s Odonata (dragonflies and damselflies). Journal of Biogeography, 49(8), 1586–1598. https://doi.org/10.1111/jbi.14457
Korea, Republic of	E Asia	no	3	30	80	110	2.04532	0.375	110		2.04139		2.72727	10	2.98915e-05	0.00109602	100363	5.00157			37.55	37.55	2022	Sandall, E. L., Pinkert, S., & Jetz, W. (2022). Country‐level checklists and occurrences for the world’s Odonata (dragonflies and damselflies). Journal of Biogeography, 49(8), 1586–1598. https://doi.org/10.1111/jbi.14457
Koro (FJI)	Melanesia	yes	0	5	1	6	0.845098	5		6		0.778151	0	0	0	0.0569801	105.3	2.02243	514	50	-17.3	17.3	2024	Donnelly, T. W., & Marinov, M. (2024). The Fijian genus Nesobasis Selys, 1891 Part 2: Revision in comparison to Nikoulabasis Ferguson et al., 2023 with particular emphasis on Vanua Levu, Taveuni, Koro and erection of 10 new species and one subspecies (Odonata: Coenagrionidae). Megataxa, 14(1), 1–266. https://doi.org/10.11646/megataxa.14.1.1
Kosrae (FSM)	Micronesia	yes	1	1	6	7	0.90309	0.166667		7		0.845098	14.2857	100	0.00898473	0.0628931	111.3	2.0465	634	2128	5.31667	5.31667	2003	Buden, D. W., & Paulson, D. R. (2003). The Odonata of Kosrae, Eastern Caroline Islands, Micronesia. Pacific Science, 57(4), 399–407. doi:10.1080/13887890.2003.10510450
Kuwait	W Asia	no	1	1	12	13	1.14613	0.0833333	13		1.11394		7.69231	100	5.6123e-05	0.000729599	17818	4.25086			29.5	29.5	2021	Boudot, Jean-Pierre, Borisov, Sergey, De Knijf, G., Van Grunsven, R. H. A., Schröter, A., & Kalkman, V. J. (2021). Atlas of the dragonflies and damselflies of West and Central Asia. 22 supplement, 1–247.
Kyrgyzstan	C Asia	no	6	20	36	56	1.75587	0.555556	56		1.74819		10.7143	30	2.99843e-05	0.000279853	200105	5.30126			42.8667	42.8667	2021	Boudot, Jean-Pierre, Borisov, Sergey, De Knijf, G., Van Grunsven, R. H. A., Schröter, A., & Kalkman, V. J. (2021). Atlas of the dragonflies and damselflies of West and Central Asia. 22 supplement, 1–247.
La Gomera (ESP)	Macaronesia	yes	1	1	9	10	1.04139	0.111111		10		1	10	100	0.00270248	0.0270248	370.03	2.56824	1487	335	28.115	28.115	2016	Weihrauch, F., Vieira, V., Cordero-Rivera, A., & de Santos Loureiro, N. (2016). Update on the zoogeography of Odonata in the Macaronesian Islands. Boletín ROLA, 8, 9–22.
La Palma (ESP)	Macaronesia	yes	2	2	9	11	1.07918	0.222222		11		1.04139	18.1818	100	0.00282358	0.0155297	708.32	2.85023	2426	422	28.66	28.66	2016	Weihrauch, F., Vieira, V., Cordero-Rivera, A., & de Santos Loureiro, N. (2016). Update on the zoogeography of Odonata in the Macaronesian Islands. Boletín ROLA, 8, 9–22.
Lanzarote (ESP)	Macaronesia	yes	1	1	7	8	0.954243	0.142857		8		0.90309	12.5	100	0.00118212	0.00945694	845.94	2.92734	671	127	29.035	29.035	2016	Weihrauch, F., Vieira, V., Cordero-Rivera, A., & de Santos Loureiro, N. (2016). Update on the zoogeography of Odonata in the Macaronesian Islands. Boletín ROLA, 8, 9–22.
Lao People's Democratic Republic	SE Asia	no	3	120	142	262	2.41996	0.84507	262		2.4183		1.14504	2.5	1.26689e-05	0.00110642	236800	5.37438			17.9667	17.9667	2022	Sandall, E. L., Pinkert, S., & Jetz, W. (2022). Country‐level checklists and occurrences for the world’s Odonata (dragonflies and damselflies). Journal of Biogeography, 49(8), 1586–1598. https://doi.org/10.1111/jbi.14457
Lastovo island (HRV)	Europe	yes	1	3	13	16	1.23045	0.230769		16		1.20412	6.25	33.3333	0.0213356	0.34137	46.87	1.67089	415	33	42.75	42.75	2020	Štih, A., Koren, T., & Franković, M. (2020). New data and checklist of dragonflies. Libellula, 39(3/4), 179–192.
Latvia	Europe	no	2	20	41	61	1.79239	0.487805	61		1.78533		3.27869	10	3.0965e-05	0.000944433	64589	4.81016			56.95	56.95	2022	Sandall, E. L., Pinkert, S., & Jetz, W. (2022). Country‐level checklists and occurrences for the world’s Odonata (dragonflies and damselflies). Journal of Biogeography, 49(8), 1586–1598. https://doi.org/10.1111/jbi.14457
Lebanon	W Asia	no	2	17	31	48	1.6902	0.548387	48		1.68124		4.16667	11.7647	0.000191351	0.00459242	10452	4.0192			33.8333	33.8333	2021	Boudot, Jean-Pierre, Borisov, Sergey, De Knijf, G., Van Grunsven, R. H. A., Schröter, A., & Kalkman, V. J. (2021). Atlas of the dragonflies and damselflies of West and Central Asia. 22 supplement, 1–247.
Lesbos (GRC)	Europe	yes	2	17	26	43	1.64345	0.653846		43		1.63347	4.65116	11.7647	0.00122474	0.0263319	1633	3.21299	968	9.13	39.2167	39.2167	2008	Bowers, J. (2008). The dragonflies of Lesbos. Friends of Green Lesbos.
Lesotho	S Africa	no	1	9	9	18	1.27875	1	18		1.25527		5.55556	11.1111	3.29435e-05	0.000592983	30355	4.48223			-29.315	29.315	2022	Sandall, E. L., Pinkert, S., & Jetz, W. (2022). Country‐level checklists and occurrences for the world’s Odonata (dragonflies and damselflies). Journal of Biogeography, 49(8), 1586–1598. https://doi.org/10.1111/jbi.14457
Leyte island (PHL)	SE Asia	yes	0	23	35	58	1.77085	0.657143		58		1.76343	0	0	0	0.00787231	7367.6	3.86733	1332	1.07	10.8333	10.8333	1997	Hämäläinen, M., & Mueller, R. A. (1997). Synopsis of the Philippine Odonata, with lists of species recorded from forty islands. Odonatologica, 26, 249–315.
Liberia	W Africa	no	1	59	142	201	2.30535	0.415493	201		2.3032		0.497512	1.69492	2.32558e-05	0.00467442	43000	4.63347			6.31667	6.31667	2022	Sandall, E. L., Pinkert, S., & Jetz, W. (2022). Country‐level checklists and occurrences for the world’s Odonata (dragonflies and damselflies). Journal of Biogeography, 49(8), 1586–1598. https://doi.org/10.1111/jbi.14457
Libya	N Africa	no	4	8	22	30	1.49136	0.363636	30		1.47712		13.3333	50	2.27332e-06	1.70499e-05	1759541	6.2454			32.8667	32.8667	2022	Sandall, E. L., Pinkert, S., & Jetz, W. (2022). Country‐level checklists and occurrences for the world’s Odonata (dragonflies and damselflies). Journal of Biogeography, 49(8), 1586–1598. https://doi.org/10.1111/jbi.14457
Liechtenstein	Europe	no	1	7	14	21	1.34242	0.5	21		1.32222		4.7619	14.2857	0.00623053	0.130841	160.5	2.20548			47.1667	47.1667	2022	Sandall, E. L., Pinkert, S., & Jetz, W. (2022). Country‐level checklists and occurrences for the world’s Odonata (dragonflies and damselflies). Journal of Biogeography, 49(8), 1586–1598. https://doi.org/10.1111/jbi.14457
Lithuania	Europe	no	2	23	47	70	1.85126	0.489362	70		1.8451		2.85714	8.69565	3.06279e-05	0.00107198	65300	4.81491			54.6833	54.6833	2022	Sandall, E. L., Pinkert, S., & Jetz, W. (2022). Country‐level checklists and occurrences for the world’s Odonata (dragonflies and damselflies). Journal of Biogeography, 49(8), 1586–1598. https://doi.org/10.1111/jbi.14457
Lombok (IDN)	SE Asia	yes	1	10	34	44	1.65321	0.294118		44		1.64345	2.27273	10	0.00021702	0.00954886	4607.88	3.6635	3727	186	-8.565	8.565	2024	Dow, R. A., Choong, C. Y., Grinang, J., Lupiyaningdyah, P., Ngiam, R. W. J., & Kalkman, V. J. (2024). Checklist of the Odonata (Insecta) of Sundaland and Wallacea (Malaysia, Singapore, Brunei, Indonesia and Timor Leste). Zootaxa, 5460(1), 1–122. https://doi.org/10.11646/zootaxa.5460.1.1
Louisiana USA)	N America	no	5	38	107	145	2.16435	0.35514	145		2.16137		3.44828	13.1579	3.7037e-05	0.00107407	135000	5.13033			30.4475	30.4475	2025	http://www.odonatacentral.org
Luxembourg	Europe	no	2	22	42	64	1.81291	0.52381	64		1.80618		3.125	9.09091	0.000773276	0.0247448	2586.4	3.4127			49.6106	49.6106	2022	Sandall, E. L., Pinkert, S., & Jetz, W. (2022). Country‐level checklists and occurrences for the world’s Odonata (dragonflies and damselflies). Journal of Biogeography, 49(8), 1586–1598. https://doi.org/10.1111/jbi.14457
Luzon island (PHL)	SE Asia	yes	2	71	69	140	2.14922	1.02899		140		2.14613	1.42857	2.8169	1.81876e-05	0.00127313	109965	5.04125	2928	663	16	16	1997	Hämäläinen, M., & Mueller, R. A. (1997). Synopsis of the Philippine Odonata, with lists of species recorded from forty islands. Odonatologica, 26, 249–315.
Macao (CHN)	E Asia	no	2	12	26	38	1.59106	0.461538	38		1.57978		5.26316	16.6667	0.0167645	0.318525	119.3	2.07664			22.19	22.19	2022	Sandall, E. L., Pinkert, S., & Jetz, W. (2022). Country‐level checklists and occurrences for the world’s Odonata (dragonflies and damselflies). Journal of Biogeography, 49(8), 1586–1598. https://doi.org/10.1111/jbi.14457
Madagascar	Indian Ocean	no	2	96	77	173	2.24055	1.24675	173		2.23805		1.15607	2.08333	3.37384e-06	0.000291837	592796	5.77291	2876	425	-18.9167	18.9167	2022	Dijkstra, Klaas-Douwe B. (2022). Odonata, dragonflies, damselflies, angidina. In S. M. Goodman, A. Andrianarimisa, A. H. Armstrong, A. Cooke, M. De Wit, J. U. Ganzhorn, L. Gautier, S. M. Goodman, J. P. G. Jones, W. L. Jungers, D. W. Krause, O. Langrand, P. P. Lowry, P. A. Racey, A. P. Raselimanana, R. J. Safford, J. S. Sparks, M. L. J. Stiassny, P. Tortosa, & M. Vences (Eds.), The New Natural His…
Madeira (PRT)	Macaronesia	yes	1	1	5	6	0.845098	0.2		6		0.778151	16.6667	100	0.00135007	0.00810045	740.7	2.86964	1862	640	32.75	32.75	2016	Weihrauch, F., Vieira, V., Cordero-Rivera, A., & de Santos Loureiro, N. (2016). Update on the zoogeography of Odonata in the Macaronesian Islands. Boletín ROLA, 8, 9–22.
Madhya Pradesh and Chhattisgarh States (IND)	S Asia	no	2	50	56	106	2.02938	0.892857	106		2.02531		1.88679	4	4.51015e-06	0.000239038	443444	5.64684			23.2599	23.2599	2013	Tiple, A. D., & Chandra, K. (2013). Dragonflies and Damselflies (Insecta, Odonata) of Madhya Pradesh and Chhattisgarh States, Central India. Journal Care4Nature, 1(1), 3–11.
Maharashtra State (IND)	S Asia	no	2	38	55	93	1.97313	0.690909	93		1.96848		2.15054	5.26316	6.49956e-06	0.00030223	307713	5.48815			18.97	18.97	2022	Sawant, D., Ogale, H., & Deulkar, R. M. (2022). An annotated checklist of odonates of Amboli-Chaukul-Parpoli region showing new records for the Maharashtra State, India with updated state checklist. Journal of Threatened Taxa, 14(11), 22164–22178. https://doi.org/10.11609/jott.7715.14.11.22164-22178
Maine (USA)	N America	no	5	45	116	161	2.20952	0.387931	161		2.20683		3.10559	11.1111	5.45578e-05	0.00175676	91646	4.96211			44.3106	44.3106	2025	http://www.odonatacentral.org
Malawi	S Africa	no	1	62	105	167	2.22531	0.590476	167		2.22272		0.598802	1.6129	8.43996e-06	0.00140947	118484	5.07366			-13.95	13.95	2022	Sandall, E. L., Pinkert, S., & Jetz, W. (2022). Country‐level checklists and occurrences for the world’s Odonata (dragonflies and damselflies). Journal of Biogeography, 49(8), 1586–1598. https://doi.org/10.1111/jbi.14457
Maldives	S Asia	yes	0	1	7	8	0.954243	0.142857		8		0.90309	0	0	0	0.0268456	298	2.47422	2.4	560	4.17528	4.17528	1992	Olsvik, H., & Hamalainen, M. (1992). Dragonfly records from the Maldive islands, Indian ocean (Odonata). Opuscula Zoologica Fluminensia, 89, 1–7.
Mali	W Africa	no	1	40	81	121	2.08636	0.493827	121		2.08279		0.826446	2.5	8.06327e-07	9.75655e-05	1240192	6.09349			12.65	12.65	2022	Sandall, E. L., Pinkert, S., & Jetz, W. (2022). Country‐level checklists and occurrences for the world’s Odonata (dragonflies and damselflies). Journal of Biogeography, 49(8), 1586–1598. https://doi.org/10.1111/jbi.14457
Mallorca (ESP)	Europe	yes	1	10	13	23	1.38021	0.769231		23		1.36173	4.34783	10	0.000274717	0.00631849	3640.11	3.56111	1436	174	39.6167	39.6167	2022	Rebassa, M., & Canyelles, X. (2022). Actualització de l’estatus dels odonats de les Illes Balears. Un repàs a la seva situació des de començaments del segle XX fins a l’actualitat. Bolletí de La Societat d’Història Natural de Les Balears, 65, 97–115.
Malta	Europe	yes	1	1	16	17	1.25527	0.0625		17		1.23045	5.88235	100	0.00316456	0.0537975	316	2.49969	253	88	35.9	35.9	2014	Gauci, C. (2014). A Review of the Odonata of the Maltese Islands. Journal of the British Dragonfly Society, 30(2), 79–109. / Degabriele, G. (2013). An overview of the dragonflies and damselflies of the Maltese Islands (Central Mediterranean) (Odonata). Bulletin of the Entomological Society of Malta, 6, 5–127.
Manitoba (CAN)	N America	no	4	29	79	108	2.03743	0.367089	108		2.03342		3.7037	13.7931	6.17477e-06	0.000166719	647797	5.81144			49.8844	49.8844	2025	http://www.odonatacentral.org
Manus island (PNG)	Melanesia	yes	0	8	12	20	1.32222	0.666667		20		1.30103	0	0	0	0.00952381	2100	3.32222	718	266	-2.1	2.1	2015	Richards, S. J., Theischinger, G., & Tamarua, W. (2015). Dragonflies and damselflies (Odonata) of Manus and Mussau Islands. In N. Whitmore (Ed.), A rapid biodiversity survey of Papua New Guinea’s Manus and Mussau Islands (pp. 27–37). Wildlife Conservation Society Papua New Guinea Program.
Marinduque island (PHL)	SE Asia	yes	0	11	16	27	1.44716	0.6875		27		1.43136	0	0	0	0.0283441	952.58	2.9789	1157	16.41	13.4	13.4	1997	Hämäläinen, M., & Mueller, R. A. (1997). Synopsis of the Philippine Odonata, with lists of species recorded from forty islands. Odonatologica, 26, 249–315.
Marshall Islands	Micronesia	yes	1	1	6	7	0.90309	0.166667		7		0.845098	14.2857	100	0.00551177	0.0385824	181.43	2.25871	10	2000	7.11667	7.11667	2018	Buden, D. W. (2018). Dragonflies and Damselflies (Insecta: Odonata) of the Republic of the Marshall Islands. Pacific Science, 72(3), 373–387. https://doi.org/10.2984/72.3.8
Martinique (FRA)	Caribean	yes	3	7	23	30	1.49136	0.304348		30		1.47712	10	42.8571	0.00265957	0.0265957	1128	3.05231	1397	416	14.65	14.65	2018	Buden, D. W. (2018). Dragonflies and Damselflies (Insecta: Odonata) of the Republic of the Marshall Islands. Pacific Science, 72(3), 373–387. https://doi.org/10.2984/72.3.8
Maryland (USA)	N America	no	6	58	124	182	2.26245	0.467742	182		2.26007		3.2967	10.3448	0.000186724	0.00566396	32133	4.50695			38.9731	38.9731	2025	http://www.odonatacentral.org
Masbate island (PHL)	SE Asia	yes	1	11	16	27	1.44716	0.6875		27		1.43136	3.7037	9.09091	0.000240861	0.00650323	4151.78	3.61823	699	43.35	12.27	12.27	1997	Hämäläinen, M., & Mueller, R. A. (1997). Synopsis of the Philippine Odonata, with lists of species recorded from forty islands. Odonatologica, 26, 249–315.
Mascarene (MUS)	S Africa	yes	2	11	20	31	1.50515	0.55		31		1.49136	6.45161	18.1818	0.000438982	0.00680421	4556	3.65858	828	1480	-20.2	20.2	2012	Couteyen, S., & Papazian, M. (2012). Catalogue et affinités géographiques des Odonata des îles voisines de Madagascar (Insecta: Pterygota). Annales de La Société Entomologique de France (Nouvelle Série), 48(1-2), 199–215.
Massachusetts (USA)	N America	no	6	50	118	168	2.22789	0.423729	168		2.22531		3.57143	12	0.000219274	0.00613968	27363	4.43716			42.3603	42.3603	2025	http://www.odonatacentral.org
Mato Grosso (BRA)	S America	no	2	128	157	285	2.45637	0.815287	285		2.45484		0.701754	1.5625	2.21396e-06	0.00031549	903357	5.95586			-15.5667	15.5667	2024	Vilela, D. S., Cordero-Rivera, A., & Guillermo-Ferreira, R. (2024). The Odonata of the Chapada dos Guimarães National Park, Mato Grosso state, Brazil, with an updated species list for the state. Odonatologica, 53(3/4), 265–296.
Mato Grosso do Sul (BRA)	S America	no	2	81	117	198	2.29885	0.692308	198		2.29667		1.0101	2.46914	5.60028e-06	0.000554428	357125	5.55282			-20.4839	20.4839	2017	Rodrigues, M. É., & Roque, F. de O. (2017). Checklist de Odonata do estado de Mato Grosso do Sul, Brasil. Iheringia, Série Zoologia, 107, e2017117. https://doi.org/10.1590/1678-4766e2017117
Mauritania	N Africa	no	2	7	20	27	1.44716	0.35	27		1.43136		7.40741	28.5714	1.94175e-06	2.62136e-05	1030000	6.01284			18.15	18.15	2011	Ferreira, S., Boudot, J. P., Tarroso, P., & Brito, J. C. (2011). Overview of Odonata known from Mauritania (West Africa). Odonatologica, 40(4), 277–285.
Mauritius	Indian Ocean	yes	2	8		24	1.39794	#DIV/0!		24		1.38021	8.33333	25	0.000980392	0.0117647	2040	3.30963	828	900	-20.2	20.2	2021	Dijkstra, K.-D. B., & Cohen, C. (2021). Libellules et demoiselles de Madagascar et des iles d l’Ouest de l’Ocean Indien / Dragonflies and damselflies of Madagascar and the Western Indian Ocean islands. Association Vahatra.
Mayotte (FRA)	Indian Ocean	yes	1	8	28	36	1.5682	0.285714		36		1.5563	2.77778	12.5	0.0026738	0.0962567	374	2.57287	660	500	-12.8431	12.8431	2021	Dijkstra, K.-D. B., & Cohen, C. (2021). Libellules et demoiselles de Madagascar et des iles d l’Ouest de l’Ocean Indien / Dragonflies and damselflies of Madagascar and the Western Indian Ocean islands. Association Vahatra.
Mendanau island (IDN)	SE Asia	yes	1	26	41	67	1.83251	0.634146		67		1.82607	1.49254	3.84615	0.00884956	0.59292	113	2.05308	179	7	-2.89778	2.89778	2019	Alfarisyi, A. (2019). Odonata survey on some of the outer islands of Belitung Regency, Belitung island, Indonesia. Faunistic Studies in South-East Asian and Pacific Island Odonata, 29, 1–34.
Menorca (ESP)	Europe	yes	1	11	11	22	1.36173	1		22		1.34242	4.54545	9.09091	0.00143719	0.0316183	695.8	2.84248	357	200	39.9667	39.9667	2022	Rebassa, M., & Canyelles, X. (2022). Actualització de l’estatus dels odonats de les Illes Balears. Un repàs a la seva situació des de començaments del segle XX fins a l’actualitat. Bolletí de La Societat d’Història Natural de Les Balears, 65, 97–115.
Mexico	N America	no	9	151	203	354	2.55023	0.743842	354		2.549		2.54237	5.96026	4.56262e-06	0.000179463	1972550	6.29503			19.4333	19.4333	2025	http://www.odonatacentral.org
Michigan (USA)	N America	no	4	48	125	173	2.24055	0.384	173		2.23805		2.31214	8.33333	1.59685e-05	0.000690638	250493	5.3988			42.7142	42.7142	2025	http://www.odonatacentral.org
Middle Button island (IND)	Indian Ocean	yes	0	1	1	2	0.477121	1		2		0.30103	0	0	0	3.86847	0.517	-0.286509	50	9	12.2756	12.2756	2015	Sivaperuman, C. (2015). Odonata of Andaman and Nicobar Islands, India. In Aquatic Ecosystem: Biodiversity, Ecology and Conservation (pp. 153–162). https://doi.org/10.1007/978-81-322-2178-4
Minas Gerais (BRA)	S America	no	2	157	196	353	2.549	0.80102	353		2.54777		0.566572	1.27389	3.4099e-06	0.000601847	586528	5.76829			-19.9167	19.9167	2020	Vilela, D. S., Koroiva, R., Tosta, T. H. A., Novaes, M. C., & Guillermo-Ferreira, R. (2020). Dragonflies and damselflies from the west of Minas Gerais, Brazil: Checklist and new records. Biota Neotropica, 20(1), e20190851. https://doi.org/10.1590/1676-0611-BN-2019-0851 / https://libelulasdemg.com.br/especies.php
Mindanao island (PHL)	SE Asia	yes	2	61	65	126	2.1038	0.938462		126		2.10037	1.5873	3.27869	2.05065e-05	0.00129191	97530	4.98914	2954	345.35	8	8	1997	Hämäläinen, M., & Mueller, R. A. (1997). Synopsis of the Philippine Odonata, with lists of species recorded from forty islands. Odonatologica, 26, 249–315.
Mindoro island (PHL)	SE Asia	yes	1	22	55	77	1.89209	0.4		77		1.88649	1.2987	4.54545	9.45913e-05	0.00728353	10571.8	4.02415	2616	13.87	12.9303	12.9303	1997	Hämäläinen, M., & Mueller, R. A. (1997). Synopsis of the Philippine Odonata, with lists of species recorded from forty islands. Odonatologica, 26, 249–315.
Minnesota (USA)	N America	no	3	44	110	154	2.19033	0.4	154		2.18752		1.94805	6.81818	1.33237e-05	0.000683949	225163	5.3525			44.9478	44.9478	2025	http://www.odonatacentral.org
Mississippi (USA)	N America	no	5	45	101	146	2.16732	0.445545	146		2.16435		3.42466	11.1111	3.98587e-05	0.00116388	125443	5.09845			32.2989	32.2989	2025	http://www.odonatacentral.org
Missouri (USA)	N America	no	5	43	93	136	2.13672	0.462366	136		2.13354		3.67647	11.6279	2.76916e-05	0.000753212	180560	5.25662			38.5678	38.5678	2025	http://www.odonatacentral.org
Moala island (FJI)	Melanesia	yes	1	6	5	11	1.07918	1.2		11		1.04139	9.09091	16.6667	0.0153846	0.169231	65	1.81291	468	134	-18.6	18.6	2025	Milen Marinov, pers. comm.
Mohéli (COM)	Indian Ocean	yes	0	4	11	15	1.20412	0.363636		15		1.17609	0	0	0	0.07109	211	2.32428	790	329	-12.25	12.25	2021	Dijkstra, K.-D. B., & Cohen, C. (2021). Libellules et demoiselles de Madagascar et des iles d l’Ouest de l’Ocean Indien / Dragonflies and damselflies of Madagascar and the Western Indian Ocean islands. Association Vahatra.
Moldova, Republic of	Europe	no	2	15	21	36	1.5682	0.714286	36		1.5563		5.55556	13.3333	5.90964e-05	0.00106374	33843	4.52947			47	47	2022	Sandall, E. L., Pinkert, S., & Jetz, W. (2022). Country‐level checklists and occurrences for the world’s Odonata (dragonflies and damselflies). Journal of Biogeography, 49(8), 1586–1598. https://doi.org/10.1111/jbi.14457
Moluccas (IDN)	SE Asia	yes	1	40	64	104	2.02119	0.625		104		2.01703	0.961538	2.5	3.18863e-05	0.00331618	31361.4	4.4964	3027	135	-3	3	2024	Dow, R. A., Choong, C. Y., Grinang, J., Lupiyaningdyah, P., Ngiam, R. W. J., & Kalkman, V. J. (2024). Checklist of the Odonata (Insecta) of Sundaland and Wallacea (Malaysia, Singapore, Brunei, Indonesia and Timor Leste). Zootaxa, 5460(1), 1–122. https://doi.org/10.11646/zootaxa.5460.1.1
Mongolia	E Asia	no	5	26	38	64	1.81291	0.684211	64		1.80618		7.8125	19.2308	0.00106293	0.0136054	4704	3.67247			47.9219	47.9219	2022	Sandall, E. L., Pinkert, S., & Jetz, W. (2022). Country‐level checklists and occurrences for the world’s Odonata (dragonflies and damselflies). Journal of Biogeography, 49(8), 1586–1598. https://doi.org/10.1111/jbi.14457
Montana (USA)	N America	no	4	35	59	94	1.97772	0.59322	94		1.97313		4.25532	11.4286	1.05042e-05	0.000246849	380800	5.5807			46.5964	46.5964	2025	http://www.odonatacentral.org
Montenegro	Europe	no	2	24	43	67	1.83251	0.55814	67		1.82607		2.98507	8.33333	0.000144061	0.00482605	13883	4.14248			42.7833	42.7833	2022	Sandall, E. L., Pinkert, S., & Jetz, W. (2022). Country‐level checklists and occurrences for the world’s Odonata (dragonflies and damselflies). Journal of Biogeography, 49(8), 1586–1598. https://doi.org/10.1111/jbi.14457
Montserrat	Caribean	yes	1	4	10	14	1.17609	0.4		14		1.14613	7.14286	25	0.00980392	0.137255	102	2.0086	1050	657	16.75	16.75	2012	Meurgey, F., & Poiron, C. (2012). An updated checklist of Lesser Antillean Odonata. International Journal of Odonatology, 15(4), 305–316. https://doi.org/10.1080/13887890.2012.738401
Morocco	N Africa	no	4	25	41	66	1.82607	0.609756	66		1.81954		6.06061	16	8.95756e-06	0.0001478	446550	5.64987			34.0333	34.0333	2022	Sandall, E. L., Pinkert, S., & Jetz, W. (2022). Country‐level checklists and occurrences for the world’s Odonata (dragonflies and damselflies). Journal of Biogeography, 49(8), 1586–1598. https://doi.org/10.1111/jbi.14457
Mozambique	S Africa	no	1	57	101	158	2.2014	0.564356	158		2.19866		0.632911	1.75439	1.24752e-06	0.000197108	801590	5.90395			-25.95	25.95	2022	Sandall, E. L., Pinkert, S., & Jetz, W. (2022). Country‐level checklists and occurrences for the world’s Odonata (dragonflies and damselflies). Journal of Biogeography, 49(8), 1586–1598. https://doi.org/10.1111/jbi.14457
Mugla province (TUR)	E Asia	no	2	17	39	56	1.75587	0.435897	56		1.74819		3.57143	11.7647	0.000158053	0.00442548	12654	4.10223			37.0303	37.0303	2007	Hope, P. (2007). The dragonflies of eastern Mugla province, Southwest Turkey. Mugla: Land of Lights Publishing.
Mussau island (PNG)	Melanesia	yes	0	5	8	13	1.14613	0.625		13		1.11394	0	0	0	0.0381232	341	2.53275	567	100	-1.417	1.417	2015	Richards, S. J., Theischinger, G., & Tamarua, W. (2015). Dragonflies and damselflies (Odonata) of Manus and Mussau Islands. In N. Whitmore (Ed.), A rapid biodiversity survey of Papua New Guinea’s Manus and Mussau Islands (pp. 27–37). Wildlife Conservation Society Papua New Guinea Program.
Myanmar	SE Asia	no	3	67	71	138	2.14301	0.943662	138		2.13988		2.17391	4.47761	4.43407e-06	0.000203967	676579	5.83032			21	21	2022	Sandall, E. L., Pinkert, S., & Jetz, W. (2022). Country‐level checklists and occurrences for the world’s Odonata (dragonflies and damselflies). Journal of Biogeography, 49(8), 1586–1598. https://doi.org/10.1111/jbi.14457
Namibia	S Africa	no	1	40	94	134	2.13033	0.425532	134		2.1271		0.746269	2.5	1.21122e-06	0.000162303	825615	5.91678			-22.5667	22.5667	2022	Sandall, E. L., Pinkert, S., & Jetz, W. (2022). Country‐level checklists and occurrences for the world’s Odonata (dragonflies and damselflies). Journal of Biogeography, 49(8), 1586–1598. https://doi.org/10.1111/jbi.14457
Nauru	Micronesia	yes	1	1	5	6	0.845098	0.2		6		0.778151	16.6667	100	0.047619	0.285714	21	1.32222	65	1600	-0.5275	0.5275	2008	Buden, D. W. (2008). First Records of Odonata From the Republic of Nauru. Micronesica, 40(1/2), 227–232.
Náxos (GRC)	Europe	yes	1	7	15	22	1.36173	0.466667		22		1.34242	4.54545	14.2857	0.00232558	0.0511628	430	2.63347	1003	130	37.0875	37.0875	2018	Gavalas, I., Salteri, A., & Alexiou, S. (2018). The Odonata fauna of Náxos and Iraklia Islands, Greece. Libellula, 37(3/4), 181–186.
Nebraska (USA)	N America	no	6	48	65	113	2.0569	0.738462	113		2.05308		5.30973	12.5	2.99467e-05	0.000563996	200356	5.3018			40.8092	40.8092	2025	http://www.odonatacentral.org
Negros island (PHL)	SE Asia	yes	1	15	25	40	1.61278	0.6		40		1.60206	2.5	6.66667	7.51337e-05	0.00300535	13309.6	4.12417	2465	43.39	10	10	1997	Hämäläinen, M., & Mueller, R. A. (1997). Synopsis of the Philippine Odonata, with lists of species recorded from forty islands. Odonatologica, 26, 249–315.
Neil island (IND)	Indian Ocean	yes	0	7	18	25	1.41497	0.388889		25		1.39794	0	0	0	1.82482	13.7	1.13672	101	25	11.83	11.83	2015	Sivaperuman, C. (2015). Odonata of Andaman and Nicobar Islands, India. In Aquatic Ecosystem: Biodiversity, Ecology and Conservation (pp. 153–162). https://doi.org/10.1007/978-81-322-2178-4
Nepal	S Asia	no	6	64	121	186	2.27184	0.528926	186		2.26951		3.22581	9.375	4.06736e-05	0.00126088	147516	5.16884			28.1667	28.1667	2022	Sandall, E. L., Pinkert, S., & Jetz, W. (2022). Country‐level checklists and occurrences for the world’s Odonata (dragonflies and damselflies). Journal of Biogeography, 49(8), 1586–1598. https://doi.org/10.1111/jbi.14457
Netherlands	Europe	no	2	27	46	73	1.86923	0.586957	73		1.86332		2.73973	7.40741	4.77726e-05	0.0017437	41865	4.62185			52.3667	52.3667	2022	Sandall, E. L., Pinkert, S., & Jetz, W. (2022). Country‐level checklists and occurrences for the world’s Odonata (dragonflies and damselflies). Journal of Biogeography, 49(8), 1586–1598. https://doi.org/10.1111/jbi.14457
Nevada (USA)	N America	no	7	36	61	97	1.99123	0.590164	97		1.98677		7.21649	19.4444	2.44429e-05	0.000338708	286382	5.45695			39.1644	39.1644	2025	http://www.odonatacentral.org
New Britain (PNG)	Oceania	yes	0	20	32	52	1.72428	0.625		52		1.716	0	0	0	0.00147963	35144	4.54585	2334	90	-5.75	5.75	2013	Michalski, J. (2012). A manual for the identification of the dragonflies and damselflies of New Guinea, Maluku and the Solomon islands. Morristown, New Jersey: Kanduanum Books. / Kalkman, V., & Orr, A. (2013). Field guide to the damselflies of New Guinea. Brachytron, 16(supplement 3), 3–120.
New Brunswick (CAN)	N America	no	3	38	97	135	2.13354	0.391753	135		2.13033		2.22222	7.89474	4.11477e-05	0.00185165	72908	4.86278			45.9573	45.9573	2025	http://www.odonatacentral.org
New Caledonia	Oceania	yes	3	19	39	58	1.77085	0.487179		58		1.76343	5.17241	15.7895	0.000161507	0.00312248	18575	4.26893	1628	1275	-22.2667	22.2667	2022	Sandall, E. L., Pinkert, S., & Jetz, W. (2022). Country‐level checklists and occurrences for the world’s Odonata (dragonflies and damselflies). Journal of Biogeography, 49(8), 1586–1598. https://doi.org/10.1111/jbi.14457
New Guinea (IND+PNG)	Melanesia	no	12	292	178	470	2.67302	1.64045	470		2.6721		2.55319	4.10959	1.5272e-05	0.000598152	785753	5.89529	4509	153	-6	6	2015	Orr, A., & Kalkman, V. (2013). Field guide to the damselflies of New Guinea. Brachytron, 16(Suplement), 3–120. / Orr, A., & Kalkman, V. (2015). Field guide to the dragonflies of New Guinea. Brachytron, 17(Suplement), 3–156.
New Hampshire (USA)	N America	no	5	49	113	162	2.21219	0.433628	162		2.20952		3.08642	10.2041	0.000206475	0.00668979	24216	4.3841			43.2067	43.2067	2025	http://www.odonatacentral.org
New Jersey (USA)	N America	no	6	57	131	188	2.27646	0.435115	188		2.27416		3.19149	10.5263	0.000265592	0.0083219	22591	4.35394			40.2237	40.2237	2025	http://www.odonatacentral.org
New Mexico (USA)	N America	no	10	54	97	151	2.18184	0.556701	151		2.17898		6.62252	18.5185	3.17546e-05	0.000479494	314915	5.49819			35.6672	35.6672	2025	http://www.odonatacentral.org
New South Wales (AUS)	Oceania	no	2	57	114	171	2.23553	0.5	171		2.233		1.16959	3.50877	2.49641e-06	0.000213443	801150	5.90371			-33.8678	33.8678	2025	http://regions.ala.org.au
New York (USA)	N America	no	6	60	137	197	2.29667	0.437956	197		2.29447		3.04569	10	4.24634e-05	0.00139422	141298	5.15014			42.6525	42.6525	2025	http://www.odonatacentral.org
New Zealand	Polynesia	yes	1	4	10	14	1.17609	0.4		14		1.14613	7.14286	25	3.7978e-06	5.31693e-05	263310	5.42047	3754	1600	-41.3	41.3	2018	Marinov, M., & Ashbee, M. (2019). Dragonflies and damselflies of New Zealand. Auckland University Press.
Newfoundland and Labrador (CAN)	N America	no	2	13	28	41	1.62325	0.464286	41		1.61278		4.87805	15.3846	4.93569e-06	0.000101182	405212	5.60768			47.5614	47.5614	2025	http://www.odonatacentral.org
Nicaragua	C America	no	3	74	91	165	2.22011	0.813187	165		2.21748		1.81818	4.05405	2.30105e-05	0.00126558	130375	5.11519			12.1	12.1	2022	Sandall, E. L., Pinkert, S., & Jetz, W. (2022). Country‐level checklists and occurrences for the world’s Odonata (dragonflies and damselflies). Journal of Biogeography, 49(8), 1586–1598. https://doi.org/10.1111/jbi.14457
Nicobar Islands (IND)	SE Asia	yes	1	14	16	30	1.49136	0.875		30		1.47712	3.33333	7.14286	0.000543183	0.0162955	1841	3.26505	642	1370	7.08333	7.08333	2015	Sivaperuman, C. (2015). Odonata of Andaman and Nicobar Islands, India. In Aquatic Ecosystem: Biodiversity, Ecology and Conservation (pp. 153–162). doi:10.1007/978-81-322-2178-4
Niger	W Africa	no	2	9	21	30	1.49136	0.428571	30		1.47712		6.66667	22.2222	1.57853e-06	2.3678e-05	1267000	6.10278			13.5136	13.5136	2022	Sandall, E. L., Pinkert, S., & Jetz, W. (2022). Country‐level checklists and occurrences for the world’s Odonata (dragonflies and damselflies). Journal of Biogeography, 49(8), 1586–1598. https://doi.org/10.1111/jbi.14457
Nigeria	W Africa	no	1	93	154	247	2.39445	0.603896	247		2.3927		0.404858	1.07527	1.08252e-06	0.000267383	923769	5.96556			9.06667	9.06667	2022	Sandall, E. L., Pinkert, S., & Jetz, W. (2022). Country‐level checklists and occurrences for the world’s Odonata (dragonflies and damselflies). Journal of Biogeography, 49(8), 1586–1598. https://doi.org/10.1111/jbi.14457
Niue	Polynesia	yes	0	0	3	3	0.60206	0		3		0.477121	0	#DIV/0!	0	0.011474	261.46	2.41741	70	1200	-19.0539	19.0539	2013	Marinov, M., Chinn, W., Edwards, E., Patrick, B., & Patrick, H. (2013). A revised and updated Odonata checklist of Samoa (Insecta: Odonata). Faunistic Studies in South-East Asian and Pacific Island Odonata, 5, 1–21.
Norfolk Island (AUS)	Oceania	yes	1	2	3	5	0.778151	0.666667		5		0.69897	20	50	0.0289017	0.144509	34.6	1.53908	319	750	-29.056	29.056	2022	Sandall, E. L., Pinkert, S., & Jetz, W. (2022). Country‐level checklists and occurrences for the world’s Odonata (dragonflies and damselflies). Journal of Biogeography, 49(8), 1586–1598. https://doi.org/10.1111/jbi.14457
North Button island (IND)	Indian Ocean	yes	0	2	3	5	0.778151	0.666667		5		0.69897	0	0	0	25.641	0.195	-0.709965	48	17.8	12.3172	12.3172	2015	Sivaperuman, C. (2015). Odonata of Andaman and Nicobar Islands, India. In Aquatic Ecosystem: Biodiversity, Ecology and Conservation (pp. 153–162). https://doi.org/10.1007/978-81-322-2178-4
North Carolina (USA)	N America	no	6	53	135	188	2.27646	0.392593	188		2.27416		3.19149	11.3208	4.30444e-05	0.00134872	139391	5.14423			35.8542	35.8542	2025	http://www.odonatacentral.org
North Caucasus (RUS)	Europe	no	3	34	47	81	1.91381	0.723404	81		1.90849		3.7037	8.82353	1.16496e-05	0.000314538	257521	5.41081			43.355	43.355	2019	Malikova, E. I., & Kosterin, O. E. (2019). Check-list of Odonata of the Russian Federation. Odonatologica, 48(1–2), 49–78. https://doi.org/10.5281/zenodo.2677689
North Dakota (USA)	N America	no	3	29	40	69	1.8451	0.725	69		1.83885		4.34783	10.3448	1.63823e-05	0.000376792	183125	5.26275			46.8143	46.8143	2025	http://www.odonatacentral.org
North Macedonia	Europe	no	2	23	40	63	1.80618	0.575	63		1.79934		3.1746	8.69565	7.86287e-05	0.0024768	25436	4.40545			42	42	2022	Sandall, E. L., Pinkert, S., & Jetz, W. (2022). Country‐level checklists and occurrences for the world’s Odonata (dragonflies and damselflies). Journal of Biogeography, 49(8), 1586–1598. https://doi.org/10.1111/jbi.14457
Northern Mariana Islands (USA)	Oceania	yes	2	3	6	9	1	0.5		9		0.954243	22.2222	66.6667	0.00431034	0.0193966	464	2.66652	965	2000	15.19	15.19	2022	Sandall, E. L., Pinkert, S., & Jetz, W. (2022). Country‐level checklists and occurrences for the world’s Odonata (dragonflies and damselflies). Journal of Biogeography, 49(8), 1586–1598. https://doi.org/10.1111/jbi.14457
Northern Territory (AUS)	Oceania	no	3	43	71	114	2.0607	0.605634	114		2.0569		2.63158	6.97674	2.22586e-06	8.45828e-05	1347791	6.12962			-12.4381	12.4381	2025	http://regions.ala.org.au
Northwest Territories (CAN)	N America	no	0	9	27	36	1.5682	0.333333	36		1.5563		0	0	0	2.67438e-05	1346106	6.12908			62.4536	62.4536	2025	http://www.odonatacentral.org
Norway	Europe	no	2	16	35	51	1.716	0.457143	51		1.70757		3.92157	12.5	5.19201e-06	0.000132396	385207	5.58569			59.9333	59.9333	2022	Sandall, E. L., Pinkert, S., & Jetz, W. (2022). Country‐level checklists and occurrences for the world’s Odonata (dragonflies and damselflies). Journal of Biogeography, 49(8), 1586–1598. https://doi.org/10.1111/jbi.14457
Nova Scotia (CAN)	N America	no	3	34	88	122	2.08991	0.386364	122		2.08636		2.45902	8.82353	5.42652e-05	0.00220679	55284	4.7426			44.6475	44.6475	2025	http://www.odonatacentral.org
Nunavut (CAN)	N America	no	0	0	2	2	0.477121	0	2		0.30103		0	#DIV/0!	0	1.08874e-06	1836993	6.26411			63.7494	63.7494	2025	http://www.odonatacentral.org
Ohio (USA)	N America	no	5	51	117	168	2.22789	0.435897	168		2.22531		2.97619	9.80392	4.30678e-05	0.00144708	116096	5.06482			39.9622	39.9622	2025	http://www.odonatacentral.org
Oklahoma (USA)	N America	no	10	58	118	176	2.24797	0.491525	176		2.24551		5.68182	17.2414	5.53958e-05	0.000974967	180519	5.25652			35.4686	35.4686	2025	http://www.odonatacentral.org
Oman	W Asia	no	4	12	33	45	1.66276	0.363636	45		1.65321		8.88889	33.3333	1.29241e-05	0.000145396	309500	5.49066			23.5889	23.5889	2021	Boudot, Jean-Pierre, Borisov, Sergey, De Knijf, G., Van Grunsven, R. H. A., Schröter, A., & Kalkman, V. J. (2021). Atlas of the dragonflies and damselflies of West and Central Asia. 22 supplement, 1–247.
Ons (ESP)	Europe	yes	0	0	2	2	0.477121	0		2		0.30103	0	#DIV/0!	0	0.448632	4.458	0.64914	128	3.7	42.3667	42.3667	2025	Cordero Rivera, A. Pers. obs.
Ontario (CAN)	N America	no	4	50	127	177	2.25042	0.393701	177		2.24797		2.25989	8	3.71611e-06	0.000164438	1076395	6.03197			43.6703	43.6703	2025	http://www.odonatacentral.org
Oregon (USA)	N America	no	5	29	64	93	1.97313	0.453125	93		1.96848		5.37634	17.2414	1.96228e-05	0.000364984	254806	5.40621			44.9231	44.9231	2025	http://www.odonatacentral.org
Outram island (IND)	Indian Ocean	yes	0	1	3	4	0.69897	0.333333		4		0.60206	0	0	0	0.28777	13.9	1.14301	43	20	12.23	12.23	2015	Sivaperuman, C. (2015). Odonata of Andaman and Nicobar Islands, India. In Aquatic Ecosystem: Biodiversity, Ecology and Conservation (pp. 153–162). https://doi.org/10.1007/978-81-322-2178-4
Ovalau (FJI)	Melanesia	yes	0	6	0	6	0.845098	#DIV/0!		6		0.778151	0	0	0	0.056391	106.4	2.02694	626	15	-17.6881	17.6881	2024	Donnelly, T. W., & Marinov, M. (2024). The Fijian genus Nesobasis Selys, 1891 Part 2: Revision in comparison to Nikoulabasis Ferguson et al., 2023 with particular emphasis on Vanua Levu, Taveuni, Koro and erection of 10 new species and one subspecies (Odonata: Coenagrionidae). Megataxa, 14(1), 1–266. https://doi.org/10.11646/megataxa.14.1.1 / Beatty, C. D., Sánchez Herrera, M., Skevington, J. H.,…
Pakin, Ant, Mokil, Pingelap (FSM)	Micronesia	yes	1	1	6	7	0.90309	0.166667		7		0.845098	14.2857	100	0.011542	0.0807941	86.64	1.93772	4	1850	7.059	7.059	2004	Buden, D. W. (2004). The Odonata of Pakin, Ant, Mokil, and Pingelap Atolls, Eastern Caroline Islands, Micronesia. Micronesica, 37, 145–155.
Pakistan	S Asia	no	8	55	80	135	2.13354	0.6875	135		2.13033		5.92593	14.5455	9.07119e-06	0.000153076	881913	5.94543			33.6917	33.6917	2022	Sandall, E. L., Pinkert, S., & Jetz, W. (2022). Country‐level checklists and occurrences for the world’s Odonata (dragonflies and damselflies). Journal of Biogeography, 49(8), 1586–1598. https://doi.org/10.1111/jbi.14457
Palau	Oceania	yes	0	4	14	18	1.27875	0.285714		18		1.25527	0	0	0	0.0392157	459	2.66181	242	884	7.5	7.5	2022	Sandall, E. L., Pinkert, S., & Jetz, W. (2022). Country‐level checklists and occurrences for the world’s Odonata (dragonflies and damselflies). Journal of Biogeography, 49(8), 1586–1598. https://doi.org/10.1111/jbi.14457
Palawan island (PHL)	SE Asia	yes	1	31	54	85	1.9345	0.574074		85		1.92942	1.17647	3.22581	8.20439e-05	0.00697373	12188.6	4.08595	2086	151.73	9.5	9.5	2018	Hämäläinen, M., & Mueller, R. A. (1997). Synopsis of the Philippine Odonata, with lists of species recorded from forty islands. Odonatologica, 26, 249–315. / Villanueva, R. J. T., Cahilog, H., Jose, E., & van Beijnen. (2018). A brief odonatological survey in Palawan and in Cuyo Island, the Philippines. IDF-Report, 119, 1–12.
Palestine, State of	W Asia	no	5	17	26	43	1.64345	0.653846	43		1.63347		11.6279	29.4118	0.0399501	0.343571	125.156	2.09745			31.7833	31.7833	2021	Boudot, Jean-Pierre, Borisov, Sergey, De Knijf, G., Van Grunsven, R. H. A., Schröter, A., & Kalkman, V. J. (2021). Atlas of the dragonflies and damselflies of West and Central Asia. 22 supplement, 1–247.
Panama	C America	no	3	96	140	236	2.37475	0.685714	236		2.37291		1.27119	3.125	3.97788e-05	0.00312927	75417	4.87747			8.96667	8.96667	2022	Sandall, E. L., Pinkert, S., & Jetz, W. (2022). Country‐level checklists and occurrences for the world’s Odonata (dragonflies and damselflies). Journal of Biogeography, 49(8), 1586–1598. https://doi.org/10.1111/jbi.14457
Panaon island (PHL)	SE Asia	yes	0	20	18	38	1.59106	1.11111		38		1.57978	0	0	0	0.198953	191	2.28103	698	0.08	10.0514	10.0514	1997	Hämäläinen, M., & Mueller, R. A. (1997). Synopsis of the Philippine Odonata, with lists of species recorded from forty islands. Odonatologica, 26, 249–315.
Panay island (PHL)	SE Asia	yes	1	15	19	34	1.54407	0.789474		34		1.53148	2.94118	6.66667	8.3257e-05	0.00283074	12011	4.07958	2117	147.97	11.15	11.15	1997	Hämäläinen, M., & Mueller, R. A. (1997). Synopsis of the Philippine Odonata, with lists of species recorded from forty islands. Odonatologica, 26, 249–315.
Paraguay	S America	no	2	46	99	145	2.16435	0.464646	145		2.16137		1.37931	4.34783	4.917e-06	0.000356483	406752	5.60933			-25.3	25.3	2022	Sandall, E. L., Pinkert, S., & Jetz, W. (2022). Country‐level checklists and occurrences for the world’s Odonata (dragonflies and damselflies). Journal of Biogeography, 49(8), 1586–1598. https://doi.org/10.1111/jbi.14457 / Dickens, J. K., Schoenberger, D., & VanCompernolle, M. (2020). Guide to the Odonata of central Ñeembucú, Paraguay: Indicator species of wetland habitats. International Journal …
Paraíba (BR)	S America	no	2	14	35	49	1.69897	0.4	49		1.6902		4.08163	14.2857	3.54359e-05	0.000868179	56440	4.75159			-7.16667	7.16667	2021	Koroiva, R., Pereira-Colavite, A., Batista, F. R. D. C., & Vilela, D. S. (2021). Checklist and contribution to the knowledge of the odonatofauna of Paraíba state, Brazil. Biota Neotropica, 21(3), e20211196. https://doi.org/10.1590/1676-0611-bn-2021-1196
Pascua (Easter) island	Pacific Ocean	yes	0	0	1	1	0.30103	0		1		0	0	#DIV/0!	0	0.00611247	163.6	2.21378	507	3600	-27.12	27.12	1998	Samways, M. J., & Osborn, R. (1998). Divergence in a transoceanic circumtropical dragonfly on a remote island. Journal of Biogeography, 25(5), 935–946.
Patagonia (ARG & CHI)	S America	no	1	9	27	36	1.5682	0.333333	36		1.5563		2.77778	11.1111	9.58703e-07	3.45133e-05	1043076	6.01832			-38.9525	38.9525	2014	Muzón, J., Pessacq, P., & Lozano, F. (2014). The Odonata (Insecta) of Patagonia: A synopsis of their current status with illustrated keys for their identification. Zootaxa, 3784(4), 346–388.
Patnanungan island (PHL)	SE Asia	yes	1	13	9	22	1.36173	1.44444		22		1.34242	4.54545	7.69231	0.00718391	0.158046	139.2	2.14364	319	41.26	14.78	14.78	2020	Villanueva, R. J. T., & Estacio, R. D. (2020). The Odonata collected in October 2019 on Patnanungan Island, Jomalig Island and Panukulan (northeastern Polillo), Philippines, with a checklist of the Polillo Odonata fauna. IDF-Report, 151, 1–21.
Pavlodar Region (KAZ)	C Asia	no	3	20	19	39	1.60206	1.05263	39		1.59106		7.69231	15	2.40385e-05	0.0003125	124800	5.09621			52.3	52.3	2014	Borisov, S. N., & Kosterin, O. E. (2014). Dragonflies and Damselflies (Odonata) of north-eastern Kazakhstan. Euroasian Entomological Journal, 13(4), 339–345.	Pavlodar Province and north- eastern Karaganda Province
Peninsular India IND)	S Asia	no	2	68	109	177	2.25042	0.623853	177		2.24797		1.12994	2.94118	3.14574e-06	0.000278398	635780	5.80331			12.9789	12.9789	2005	Subramanian, K. A. (2005). Dragonflies and Damselflies of Peninsular India. A field guide. Bangalore: Indian Academy of Sciences.
Peninsular Malaysia (MYS)	SE Asia	no	1	103	150	253	2.40483	0.686667	253		2.40312		0.395257	0.970874	7.54774e-06	0.00190958	132490	5.12218			3.14778	3.14778	2024	Dow, R. A., Choong, C. Y., Grinang, J., Lupiyaningdyah, P., Ngiam, R. W. J., & Kalkman, V. J. (2024). Checklist of the Odonata (Insecta) of Sundaland and Wallacea (Malaysia, Singapore, Brunei, Indonesia and Timor Leste). Zootaxa, 5460(1), 1–122. https://doi.org/10.11646/zootaxa.5460.1.1
Pennsylvania (USA)	N America	no	6	58	128	186	2.27184	0.453125	186		2.26951		3.22581	10.3448	5.03005e-05	0.00155932	119283	5.07658			40.2697	40.2697	2025	http://www.odonatacentral.org
Perhentian islands (MYS)	SE Asia	yes	1	5	14	19	1.30103	0.357143		19		1.27875	5.26316	20	0.0626566	1.19048	15.96	1.20303	344	17	5.91667	5.91667	2022	Bedjanič, M. (2022). Odonata records from Perhentian Islands, Malaysia. Notulae Odonatologicae, 9(9). https://doi.org/10.60024/nodo.v9i9.a3
Peru	S America	no	2	238	240	478	2.68034	0.991667	478		2.67943		0.41841	0.840336	1.55616e-06	0.000371922	1.28522e+06	6.10898			-12.0433	12.0433	2022	Sandall, E. L., Pinkert, S., & Jetz, W. (2022). Country‐level checklists and occurrences for the world’s Odonata (dragonflies and damselflies). Journal of Biogeography, 49(8), 1586–1598. https://doi.org/10.1111/jbi.14457
Pico (PRT)	Macaronesia	yes	2	2	2	4	0.69897	1		4		0.60206	50	100	0.00449469	0.00898937	444.97	2.64833	2351	1613	38.4658	38.4658	2016	Weihrauch, F., Vieira, V., Cordero-Rivera, A., & de Santos Loureiro, N. (2016). Update on the zoogeography of Odonata in the Macaronesian Islands. Boletín ROLA, 8, 9–22.
Pitcairn (GBR)	Pacific Ocean	yes	0	0	1	1	0.30103	0		1		0	0	#DIV/0!	0	0.0212766	47	1.6721	330	5500	-25.0667	25.0667	2022	Sandall, E. L., Pinkert, S., & Jetz, W. (2022). Country‐level checklists and occurrences for the world’s Odonata (dragonflies and damselflies). Journal of Biogeography, 49(8), 1586–1598. https://doi.org/10.1111/jbi.14457
Pohnpei (FSM)	Micronesia	yes	1	7	8	15	1.20412	0.875		15		1.17609	6.66667	14.2857	0.00299401	0.0449102	334	2.52375	782	1350	6.9	6.9	2003	Paulson, D. R., & Buden, D. W. (2003). The Odonata of Pohnpei, Eastern Caroline Island , Micronesia. International Journal of Odonatology, 6(1), 39–64.
Poland	Europe	no	2	26	49	75	1.88081	0.530612	75		1.87506		2.66667	7.69231	6.39599e-06	0.00023985	312696	5.49512			52.2167	52.2167	2022	Sandall, E. L., Pinkert, S., & Jetz, W. (2022). Country‐level checklists and occurrences for the world’s Odonata (dragonflies and damselflies). Journal of Biogeography, 49(8), 1586–1598. https://doi.org/10.1111/jbi.14457
Polillo Island (PHL)	SE Asia	yes	0	35	40	75	1.88081	0.875		75		1.87506	0	0	0	0.119256	628.9	2.79858	324	18.71	14.8428	14.8428	2010	Villanueva, R. J. T. (2010). Odonata fauna of Polillo Island—Revisited. International Dragonfly Fund - Report, 27(April), 1–16. / Villanueva, R. J. T., & Schorr, M. (2011). Two new damselfly species from Polillo Island, Philippines (Odonata: Platystictidae). Zootaxa, 3017, 46–50.
Porto Santo (PRT)	Macaronesia	yes	1	1	4	5	0.778151	0.25		5		0.69897	20	100	0.0235294	0.117647	42.5	1.62839	517	652	33.0619	33.0619	2016	Weihrauch, F., Vieira, V., Cordero-Rivera, A., & de Santos Loureiro, N. (2016). Update on the zoogeography of Odonata in the Macaronesian Islands. Boletín ROLA, 8, 9–22.
Portugal	Europe	no	2	23	43	66	1.82607	0.534884	66		1.81954		3.0303	8.69565	2.24522e-05	0.000740924	89078	4.94977			38.7667	38.7667	2006	Ferreira, S., Grosso-silva, J. M., Lohr, M., Weihrauch, F., & Jödicke, R. (2006). A critical checklist of the Odonata of Portugal. International Journal of Odonatology, 9(2), 133–150. / Lesparre, D. (2017). Première observation de Trithemis kirbyi Sélys, 1891 (Odonata: Libellulidae) au Portugal. Boletín de La Sociedad Entomológica Aragonesa, 60, 363–364.
Prince Edward Island (CAN)	N America	yes	2	25	49	74	1.87506	0.510204		74		1.86923	2.7027	8	0.000353357	0.0130742	5660	3.75282	140	14	46.4	46.4	2023	Giberson, D. J., Harding, R. W., & Curley, R. (2023). Paul Brunelle’s legacy in PEI: the dragonflies and damselflies of Prince Edward island. Newsletter of the Biological Survey of Canada, 42(1), 24–36.
Puerto Rico	Caribean	yes	3	12	39	51	1.716	0.307692		51		1.70757	5.88235	25	0.000217517	0.0036978	13792	4.13963	1338	732.4	18.45	18.45	2024	https://www.pugetsound.edu/puget-sound-museum-natural-history/biodiversity-resources/insects/dragonflies/world-odonata-list/west-indian-odonata
Qatar	W Asia	no	2	2	32	34	1.54407	0.0625	34		1.53148		5.88235	100	0.000172697	0.00293584	11581	4.06375			25.3	25.3	2021	Boudot, Jean-Pierre, Borisov, Sergey, De Knijf, G., Van Grunsven, R. H. A., Schröter, A., & Kalkman, V. J. (2021). Atlas of the dragonflies and damselflies of West and Central Asia. 22 supplement, 1–247.
Québec (CAN)	N America	no	2	38	105	143	2.15836	0.361905	143		2.15534		1.3986	5.26316	1.29697e-06	9.27333e-05	1542056	6.1881			46.8139	46.8139	2025	http://www.odonatacentral.org
Queensland (AUS)	Oceania	no	3	85	172	257	2.41162	0.494186	257		2.40993		1.16732	3.52941	1.74112e-06	0.000149156	1723030	6.23629			-27.4689	27.4689	2015	http://regions.ala.org.au/states/Queensland
Rabi (FJI)	Melanesia	yes	0	4	0	4	0.69897	#DIV/0!		4		0.60206	0	0	0	0.0594354	67.3	1.82802	463	5.8	-16.5	16.5	2024	Donnelly, T. W., & Marinov, M. (2024). The Fijian genus Nesobasis Selys, 1891 Part 2: Revision in comparison to Nikoulabasis Ferguson et al., 2023 with particular emphasis on Vanua Levu, Taveuni, Koro and erection of 10 new species and one subspecies (Odonata: Coenagrionidae). Megataxa, 14(1), 1–266. https://doi.org/10.11646/megataxa.14.1.1 / Beatty, C. D., Sánchez Herrera, M., Skevington, J. H.,…
Rajasthan (IND)	S Asia	no	5	30	50	80	1.90849	0.6	80		1.90309		6.25	16.6667	1.46097e-05	0.000233755	342239	5.53433			26.5727	26.5727	2015	Husain, A. (2015). Odonate Fauna of Rajasthan, India with Links to Arabia and Himalaya. In Aquatic Ecosystem: Biodiversity, Ecology and Conservation (pp. 117–151). doi:10.1007/978-81-322-2178-4 / Singh, D., Signh, B., & Hermans, J. T. (2017). Dragonflies and Damselflies (Odonata: Insecta) of Keoladeo National Park, Rajasthan, India. Journal of Threatened Taxa, 9(7), 10445–10452.
Réunion (FRA)	Indian Ocean	yes	1	6	17	23	1.38021	0.352941		23		1.36173	4.34783	16.6667	0.000398089	0.00915605	2512	3.40002	3069	700	-21.1144	21.1144	2021	Dijkstra, K.-D. B., & Cohen, C. (2021). Libellules et demoiselles de Madagascar et des iles d l’Ouest de l’Ocean Indien / Dragonflies and damselflies of Madagascar and the Western Indian Ocean islands. Association Vahatra.
Rhode Island (USA)	N America	no	5	47	90	137	2.13988	0.522222	137		2.13672		3.64964	10.6383	0.00124969	0.0342414	4001	3.60217			41.8236	41.8236	2025	http://www.odonatacentral.org
Rio de Janeiro (BRA)	S America	no	2	76	165	241	2.38382	0.460606	241		2.38202		0.829876	2.63158	4.57707e-05	0.00551537	43696.1	4.64044			-22.9	22.9	2015	Carvalho, A. L., & Nessimian, J. L. (1998). Odonata do Estado do Rio de Janeiro, Brasil: Hábitats e hábitos das larvas. Oecologia Brasiliensis, 5(1), 3–28. https://doi.org/10.4257/oeco.1998.0501.01 / Kompier, T. (2015). A guide to the dragonflies and damselflies of the Serra dos Orgaos, Southeastern Brazil. REGUA publications.
Rio Grande so Sul (BRA)	S America	no	2	61	121	182	2.26245	0.504132	182		2.26007		1.0989	3.27869	7.09957e-06	0.000646061	281707	5.4498			-30	30	2018	Dalzochio, M. S., Renner, S., Sganzerla, C., Prass, G., Ely, G. J., Salvi, L. C., Dametto, N., & Périco, E. (2018). Checklist of Odonata (Insecta) in the state of Rio Grande do Sul, Brazil with seven new records. Biota Neotropica, 18(4). https://doi.org/10.1590/1676-0611-bn-2018-0551
Rodrigues island	E Africa	yes	1	2	6	8	0.954243	0.333333		8		0.90309	12.5	50	0.00925926	0.0740741	108	2.03342	398	1500	-19.7167	19.7167	2021	Dijkstra, K.-D. B., & Cohen, C. (2021). Libellules et demoiselles de Madagascar et des iles d l’Ouest de l’Ocean Indien / Dragonflies and damselflies of Madagascar and the Western Indian Ocean islands. Association Vahatra.
Romania	Europe	no	2	26	45	71	1.85733	0.577778	71		1.85126		2.8169	7.69231	8.38937e-06	0.000297823	238397	5.3773			44.4167	44.4167	2022	Sandall, E. L., Pinkert, S., & Jetz, W. (2022). Country‐level checklists and occurrences for the world’s Odonata (dragonflies and damselflies). Journal of Biogeography, 49(8), 1586–1598. https://doi.org/10.1111/jbi.14457
Rota island (MNP)	SE Asia	yes	1	3	2	5	0.778151	1.5		5		0.69897	20	33.3333	0.0117467	0.0587337	85.13	1.93008	495	1900	14.1536	14.1536	2000	Polhemus, D. A. (2000). A new species of Ischnura from Rota (Odonata: Coenagrionidae), and a discussion of Zygopteran zoogeography in the insular tropical Pacific. Bishop Museum Occasional Papers, 12, 5–12. / Lieftinck, M. A. (1962). Insects of Micronesia. Odonata (Vol. 5). Honolulu: Bernice P. Bishop Museum.
Rote island (IDN)	SE Asia	yes	1	6	17	23	1.38021	0.352941		23		1.36173	4.34783	16.6667	0.000781189	0.0179673	1280.1	3.10724	436	11.8	-10.75	10.75	2020	Pinto, R. M. da S., Lopes, J. P., Trainor, C. R., & Seehausen, M. (2020). New records of Odonata from the eastern Lesser Sunda Islands of Timor, Semau, Rote, and Alor, with discovery of Hemicordulia eduardi (Odonata: Corduliidae). Faunistic Studies in South-East Asian and Pacific Island Odonata, 33, 1–60.
Rwanda	E Africa	no	1	33	84	117	2.07188	0.392857	117		2.06819		0.854701	3.0303	3.73162e-05	0.004366	26798	4.4281			-1.94389	1.94389	2022	Sandall, E. L., Pinkert, S., & Jetz, W. (2022). Country‐level checklists and occurrences for the world’s Odonata (dragonflies and damselflies). Journal of Biogeography, 49(8), 1586–1598. https://doi.org/10.1111/jbi.14457
Sabtang island (PHL)	SE Asia	yes	1	4	8	12	1.11394	0.5		12		1.07918	8.33333	25	0.02457	0.29484	40.7	1.60959	980	195.6	20.335	20.335	2009	Villanueva, R. J. T. (2009). Dragonflies of Babuyam and Batanes group of islands, Philippines (Insecta: Odonata). IDF-Report, 17, 1–16.
Saint Barthélemy (FRA)	Caribean	yes	1	1	8	9	1	0.125		9		0.954243	11.1111	100	0.0114943	0.103448	87	1.93952	286	790	17.8979	17.8979	2022	Sandall, E. L., Pinkert, S., & Jetz, W. (2022). Country‐level checklists and occurrences for the world’s Odonata (dragonflies and damselflies). Journal of Biogeography, 49(8), 1586–1598. https://doi.org/10.1111/jbi.14457
Saint Eustatius (NDL)	Caribean	yes	1	1	5	6	0.845098	0.2		6		0.778151	16.6667	100	0.047619	0.285714	21	1.32222	1047	741.9	17.4833	17.4833	2018	Smit, J. T., Dijkstra, K.-D. B., Beentjes, K., Miller, J., Madden, H., & van der Hoorn, B. (2018). First records of Odonata from Sint Eustatius, Dutch Lesser Antilles. Notulae Odonatologicae, 9(2), 78–82.
Saint Helena (GBR)	Atlantic ocean	yes	0	0	1	1	0.30103	0		1		0	0	#DIV/0!	0	0.00821018	121.8	2.08565	820	1880	-15.9333	15.9333	2021	Pryce, D. (2021). Sympetrum dilatatum. The IUCN Red List of Threatened Species, e.T21226A193512121. https://doi.org/10.2305/IUCN.UK.2021-3.RLTS.T21226A193512121.en
Saint Kitts and Nevis	Caribean	yes	1	2	4	6	0.845098	0.5		6		0.778151	16.6667	50	0.00383142	0.0229885	261	2.41664	1156	706.3	17.3	17.3	2022	Sandall, E. L., Pinkert, S., & Jetz, W. (2022). Country‐level checklists and occurrences for the world’s Odonata (dragonflies and damselflies). Journal of Biogeography, 49(8), 1586–1598. https://doi.org/10.1111/jbi.14457
Saint Lucia island	Caribean	yes	3	9	21	30	1.49136	0.428571		30		1.47712	10	33.3333	0.00486224	0.0486224	617	2.79029	950	341.4	13.8833	13.8833	2011	Poiron, C., & Meurgey, F. (2011). The Odonata of St Lucia (Lesser Antilles). L’Herminier Natural History Society. / Sandall, E. L., Pinkert, S., & Jetz, W. (2022). Country‐level checklists and occurrences for the world’s Odonata (dragonflies and damselflies). Journal of Biogeography, 49(8), 1586–1598. https://doi.org/10.1111/jbi.14457
Saint Martin (FRA-NDL)	Caribean	yes	1	1	5	6	0.845098	0.2		6		0.778151	16.6667	100	0.0113636	0.0681818	88	1.94448	424	802.2	18.06	18.06	2011	Meurgey, F., & Picard, L. (2011). Les libellules des Antilles françaises. Môze: Biotope-Parthénope.
Saint Pierre and Miquelon	N America	yes	0	4	6	10	1.04139	0.666667		10		1	0	0	0	0.0413223	242	2.38382	240	21.16	46.7778	46.7778	2022	Sandall, E. L., Pinkert, S., & Jetz, W. (2022). Country‐level checklists and occurrences for the world’s Odonata (dragonflies and damselflies). Journal of Biogeography, 49(8), 1586–1598. https://doi.org/10.1111/jbi.14457
Saint Vincent and the Grenadines	Caribean	yes	1	4	11	15	1.20412	0.363636		15		1.17609	6.66667	25	0.00257069	0.0385604	389	2.58995	1234	272.2	13.1667	13.1667	2022	Sandall, E. L., Pinkert, S., & Jetz, W. (2022). Country‐level checklists and occurrences for the world’s Odonata (dragonflies and damselflies). Journal of Biogeography, 49(8), 1586–1598. https://doi.org/10.1111/jbi.14457
Sálvora (ESP)	Europe	yes	0	1	1	2	0.477121	1		2		0.30103	0	0	0	1.05263	1.9	0.278754	71	3.8	42.4736	42.4736	2025	Cordero Rivera, A. Pers. obs.
Samar island (PHL)	SE Asia	yes	0	32	37	69	1.8451	0.864865		69		1.83885	0	0	0	0.00513821	13428.8	4.12804	890	15.55	12	12	1997	Hämäläinen, M., & Mueller, R. A. (1997). Synopsis of the Philippine Odonata, with lists of species recorded from forty islands. Odonatologica, 26, 249–315.
Samoa	Polynesia	yes	6	14	16	30	1.49136	0.875		30		1.47712	20	42.8571	0.00211939	0.010597	2831	3.45194	1858	875	-13.8333	13.8333	2013	Marinov, M., Chinn, W., Edwards, E., Patrick, B., & Patrick, H. (2013). A revised and updated Odonata checklist of Samoa (Insecta: Odonata). Journal of the International Dragonfly Fund, 5, 1–21.
Samos (GRC)	Europe	yes	1	7	16	23	1.38021	0.4375		23		1.36173	4.34783	14.2857	0.00209468	0.0481776	477.4	2.67888	1434	2.11	37.75	37.75	2020	Kalfayan, M., & Taylor, J. R. E. (2020). Dragonfly assemblages in four Mediterranean wetlands of Samos Island, Greece (Odonata). Fragmenta Entomologica, 52(2), 377–385. https://doi.org/10.4081/fe.2020.470
San Andrés (COL)	Caribean	yes	1	1	5	6	0.845098	0.2		6		0.778151	16.6667		0.0384615	0.230769	26	1.41497	84	195	12.5833	12.5833	2013	Meurgey, F. (2013). A catalogue of the West Indian dragonflies (Insecta: Odonata). Annales de La Société Entomologique de France (Nouvelle Série), 49(3), 298–334. https://doi.org/10.1080/00379271.2013.848066
San Cristóbal (Galápagos) (ECU)	Pacific Ocean	yes	1	1	4	5	0.778151	0.25		5		0.69897	20	100	0.00179211	0.00896057	558	2.74663	713	934	-0.83	0.83	2025	Peck, S. B. (2013). CDF Checklist of Galapagos Dragonflies and Damselflies. In F. Bungartz, H. Herrera, P. Jaramillo, N. Tirado, G. Jímenez-Uzcategui, D. Ruiz, A. Guézou, & F. Ziemmeck (Eds.), Charles Darwin Foundation Galapagos Species Checklist—Lista de Especies de Galápagos de la Fundación Charles Darwin (pp. 1–3). Charles Darwin Foundation / Fundación Charles Darwin. / https://datazone.darwin…
San Juan province (ARG)	S America	no	1	4	11	15	1.20412	0.363636	15		1.17609		6.66667	25	1.11544e-05	0.000167315	89651	4.95256			-30.87	30.87	2022	Romero, F. (2022). Inventario preliminar de insectos acuáticos en la provincia de San Juan, Argentina: Distribución y ecología. Acta Zoológica Lilloana, 66(1), 10–44. https://doi.org/10.30550/j.azl/2022.66.1/2022-02-03
San Salvador island (BHS)	Caribean	yes			14	14	1.17609	0		14		1.14613	0	#DIV/0!	0	0.0858896	163	2.21219	40	615	24.1	24.1	1994	Smith, D. L., & Smith, S. G. F. (1994). Life history and ecology of the dragonflies (Odonata: Anisoptera) of San Salvador, Bahamas. Proceedings of the Fifth Symposium on the Natural History of the Bahamas, 81–88.
Sanga-Sanga island (PHL)	SE Asia	yes	0	9	25	34	1.54407	0.36		34		1.53148	0	0	0	0.742358	45.8	1.66087	69	55.49	5.0725	5.0725	2012	Villanueva, R. J. T., & Cahilog, H. (2012). Notes on a small Odonata collection from Tawi-Tawi, Sanga-Sanga and Jolo islands, Philippines. International Dragonfly Fund - Report, 55, 1–32.
Santa Catarina (BRA)	S America	no	2	54	93	147	2.17026	0.580645	147		2.16732		1.36054	3.7037	2.08854e-05	0.00153508	95760.7	4.98119			-27.6122	27.6122	2024	Pires, M. M., & Périco, E. (2024). Preliminary checklist of dragonflies (Insecta: Odonata) of the Santa Catarina State, Brazil. Biota Neotropica, 24(1), e20241614. https://doi.org/10.1590/1676-0611-bn-2024-1614
Santa Cruz (Galápagos) (ECU)	Pacific Ocean	yes	1	1	4	5	0.778151	0.25		5		0.69897	20	100	0.0010142	0.00507099	986	2.99388	864	1034	-0.6255	0.6255	2025	Peck, S. B. (2013). CDF Checklist of Galapagos Dragonflies and Damselflies. In F. Bungartz, H. Herrera, P. Jaramillo, N. Tirado, G. Jímenez-Uzcategui, D. Ruiz, A. Guézou, & F. Ziemmeck (Eds.), Charles Darwin Foundation Galapagos Species Checklist—Lista de Especies de Galápagos de la Fundación Charles Darwin (pp. 1–3). Charles Darwin Foundation / Fundación Charles Darwin. / https://datazone.darwin…
Santa María (PRT)	Macaronesia	yes	2	2	2	4	0.69897	1		4		0.60206	50	100	0.0206462	0.0412925	96.87	1.98619	586.8	1379	36.9747	36.9747	2016	Weihrauch, F., Vieira, V., Cordero-Rivera, A., & de Santos Loureiro, N. (2016). Update on the zoogeography of Odonata in the Macaronesian Islands. Boletín ROLA, 8, 9–22.
Santiago (Galápagos) (ECU)	Pacific Ocean	yes	1	1	3	4	0.69897	0.333333		4		0.60206	25	100	0.0017094	0.00683761	585	2.76716	906	1081	-0.252364	0.252364	2025	Peck, S. B. (2013). CDF Checklist of Galapagos Dragonflies and Damselflies. In F. Bungartz, H. Herrera, P. Jaramillo, N. Tirado, G. Jímenez-Uzcategui, D. Ruiz, A. Guézou, & F. Ziemmeck (Eds.), Charles Darwin Foundation Galapagos Species Checklist—Lista de Especies de Galápagos de la Fundación Charles Darwin (pp. 1–3). Charles Darwin Foundation / Fundación Charles Darwin. / https://datazone.darwin…
São Jorge (PRT)	Macaronesia	yes	2	2	2	4	0.69897	1		4		0.60206	50	100	0.0082085	0.016417	243.65	2.38677	1053.4	1587	38.6447	38.6447	2016	Weihrauch, F., Vieira, V., Cordero-Rivera, A., & de Santos Loureiro, N. (2016). Update on the zoogeography of Odonata in the Macaronesian Islands. Boletín ROLA, 8, 9–22.
São Miguel (PRT)	Macaronesia	yes	2	2	3	5	0.778151	0.666667		5		0.69897	40	100	0.00268619	0.00671547	744.55	2.87189	1105	1373	37.7786	37.7786	2016	Weihrauch, F., Vieira, V., Cordero-Rivera, A., & de Santos Loureiro, N. (2016). Update on the zoogeography of Odonata in the Macaronesian Islands. Boletín ROLA, 8, 9–22.
Sao Paulo (BRA)	S America	no	2	91	160	251	2.4014	0.56875	251		2.39967		0.796813	2.1978	8.05738e-06	0.0010112	248220	5.39484			-23.55	23.55	2000	Costa, J. M., Machado, A. B. M., Lencioni, F. A. A., & Santos, T. C. (2000). Diversidade e distribuição dos Odonata (Insecta ) no estado de São Paulo, Brasil: Parte 1 - Lista das espécies e registros bibliográficos. Publicaçoes Avulsas Do Museu Nacional, 80, 1–27.
Sao Tome and Principe	W Africa	yes	1	3	19	22	1.36173	0.157895		22		1.34242	4.54545	33.3333	0.00103734	0.0228216	964	2.98408	2024	245	0.333333	0.333333	2022	Dijkstra, K.-D. B., Tate, R. B., & Papazian, M. (2022). Dragonflies and Damselflies (Odonata) of Príncipe, São Tomé, and Annobón. In L. M. P. Ceríaco, R. F. De Lima, M. Melo, & R. C. Bell (Eds.), Biodiversity of the Gulf of Guinea Oceanic Islands (pp. 371–381). Springer International Publishing. https://doi.org/10.1007/978-3-031-06153-0_14
Sarangani island (PHL)	SE Asia	yes	0	5	12	17	1.25527	0.416667		17		1.23045	0	0	0	0.173966	97.72	1.98998	1131	11.38	5.412	5.412	2014	Villanueva, Reagan J.T., & Cahilog, H. (2014). Odonata Fauna of Balut and Sarangani island, Davao Occidental Province Philippines. IDF-Report, 66, 1–23.
Sardinia (ITA)	Europe	yes	2	15	27	42	1.63347	0.555556		42		1.62325	4.7619	13.3333	8.3022e-05	0.00174346	24090	4.38184	1834	217	39.2278	39.2278	2023	La Porta, G., Landi, F., Leandri, F., & Assandri, G. (2023). The new Checklist of the Italian Fauna: Odonata. Biogeographia – The Journal of Integrative Biogeography, 38(1), ucl009. https://doi.org/10.21426/B638158781
Saskatchewan (CAN)	N America	no	4	25	52	77	1.89209	0.480769	77		1.88649		5.19481	16	6.13591e-06	0.000118116	651900	5.81418			50.4547	50.4547	2025	http://www.odonatacentral.org
Saudi Arabia	W Asia	no	3	8	34	42	1.63347	0.235294	42		1.62325		7.14286	37.5	1.39555e-06	1.95377e-05	2149690	6.33238			24.65	24.65	2021	Boudot, Jean-Pierre, Borisov, Sergey, De Knijf, G., Van Grunsven, R. H. A., Schröter, A., & Kalkman, V. J. (2021). Atlas of the dragonflies and damselflies of West and Central Asia. 22 supplement, 1–247.
Seliu island (IDN)	SE Asia	yes	1	17	35	52	1.72428	0.485714		52		1.716	1.92308	5.88235	0.0591716	3.07692	16.9	1.22789	28	4	-3.22267	3.22267	2019	Alfarisyi, A. (2019). Odonata survey on some of the outer islands of Belitung Regency, Belitung island, Indonesia. Faunistic Studies in South-East Asian and Pacific Island Odonata, 29, 1–34.
Semau island (IDN)	SE Asia	yes	0	2	9	11	1.07918	0.222222		11		1.04139	0	0	0	0.0489324	224.8	2.3518	157	2.7	-10.2167	10.2167	2020	Pinto, R. M. da S., Lopes, J. P., Trainor, C. R., & Seehausen, M. (2020). New records of Odonata from the eastern Lesser Sunda Islands of Timor, Semau, Rote, and Alor, with discovery of Hemicordulia eduardi (Odonata: Corduliidae). Faunistic Studies in South-East Asian and Pacific Island Odonata, 33, 1–60.
Senegal	W Africa	no	1	27	63	90	1.95904	0.428571	90		1.95424		1.11111	3.7037	5.08332e-06	0.000457498	196722	5.29385			14.6667	14.6667	2022	Sandall, E. L., Pinkert, S., & Jetz, W. (2022). Country‐level checklists and occurrences for the world’s Odonata (dragonflies and damselflies). Journal of Biogeography, 49(8), 1586–1598. https://doi.org/10.1111/jbi.14457
Seram (IDN)	SE Asia	yes	0	11	39	50	1.70757	0.282051		50		1.69897	0	0	0	0.00292398	17100	4.233	3027	200	-3.13333	3.13333	2024	Dow, R. A., Choong, C. Y., Grinang, J., Lupiyaningdyah, P., Ngiam, R. W. J., & Kalkman, V. J. (2024). Checklist of the Odonata (Insecta) of Sundaland and Wallacea (Malaysia, Singapore, Brunei, Indonesia and Timor Leste). Zootaxa, 5460(1), 1–122. https://doi.org/10.11646/zootaxa.5460.1.1
Serbia	Europe	no	2	23	40	63	1.80618	0.575	63		1.79934		3.1746	8.69565	2.25991e-05	0.000711872	88499	4.94694			44.8	44.8	2009	Boudot, J. P., Kalkman, V. J., Azpilicueta Amorín, M., Bogdanovic, T., Cordero Rivera, A., Degabriele, G., … Schneider, W. (2009). Atlas of the Odonata of the Mediterranean and North Africa. Libellula Supplement, 9, 1–256.
Sergipe (BRA)	S America	no	1	6	28	34	1.54407	0.214286	34		1.53148		2.94118	16.6667	4.56404e-05	0.00155177	21910.4	4.34065			-10.56	10.56	2020	Santos, J. C., Vilela, D. S., de Almeida, W. R., dos Santos, B., dos Santos, A. E., Bezerra, L. M. de M., dos Santos, L., Neto, A. M. dos S., Venâncio, H., & Carneiro, M. A. A. (2020). A rapid survey of dragonflies and damselflies (Insecta: Odonata) reveals 29 new records to Sergipe State , Brazil. Hetariana, 2(2), 29–34.
Seychelles	Indian Ocean	yes	1	7	15	22	1.36173	0.466667		22		1.34242	4.54545	14.2857	0.00218818	0.04814	457	2.65992	905	1070	-4.61667	4.61667	2012	Couteyen, S., & Papazian, M. (2012). Catalogue et affinités géographiques des Odonata des îles voisines de Madagascar (Insecta: Pterygota). Annales de La Société Entomologique de France (Nouvelle Série), 48(1-2), 199–215.
Siargao (PHL)	SE Asia	yes	0	21	26	47	1.68124	0.807692		47		1.6721	0	0	0	0.107551	437	2.64048	157.9	8.2	9.905	9.905	2011	Villanueva, R. J. T. (2011). Odonata of Siargao and Bucas Grande islands , The Philippines. International Dragonfly Fund - Report, 34, 1–25.
Sibutu island (PHL)	SE Asia	yes	0	6	20	26	1.43136	0.3		26		1.41497	0	0	0	0.257426	101	2.00432	23	36.97	4.69517	4.69517	1997	Hämäläinen, M., & Mueller, R. A. (1997). Synopsis of the Philippine Odonata, with lists of species recorded from forty islands. Odonatologica, 26, 249–315.
Sibuyan island (PHL)	SE Asia	yes	1	14	23	37	1.57978	0.608696		37		1.5682	2.7027	7.14286	0.00224719	0.0831461	445	2.64836	2058	73.26	12.3856	12.3856	1997	Hämäläinen, M., & Mueller, R. A. (1997). Synopsis of the Philippine Odonata, with lists of species recorded from forty islands. Odonatologica, 26, 249–315.
Sicily (ITA)	Europe	yes	3	17	36	53	1.73239	0.472222		53		1.72428	5.66038	17.6471	0.000116135	0.00205172	25832	4.41216	3357	3	38.1111	38.1111	2023	La Porta, G., Landi, F., Leandri, F., & Assandri, G. (2023). The new Checklist of the Italian Fauna: Odonata. Biogeographia – The Journal of Integrative Biogeography, 38(1), ucl009. https://doi.org/10.21426/B638158781
Sierra Leone	W Africa	no	1	55	124	179	2.25527	0.443548	179		2.25285		0.558659	1.81818	1.36515e-05	0.00244362	73252	4.86482			8.5	8.5	2022	Sandall, E. L., Pinkert, S., & Jetz, W. (2022). Country‐level checklists and occurrences for the world’s Odonata (dragonflies and damselflies). Journal of Biogeography, 49(8), 1586–1598. https://doi.org/10.1111/jbi.14457
Singapore	SE Asia	yes	1	51	85	136	2.13672	0.6		136		2.13354	0.735294	1.96078	0.00135943	0.184883	735.6	2.86664	165	0.79	1.28333	1.28333	2024	Dow, R. A., Choong, C. Y., Grinang, J., Lupiyaningdyah, P., Ngiam, R. W. J., & Kalkman, V. J. (2024). Checklist of the Odonata (Insecta) of Sundaland and Wallacea (Malaysia, Singapore, Brunei, Indonesia and Timor Leste). Zootaxa, 5460(1), 1–122. https://doi.org/10.11646/zootaxa.5460.1.1
Siquijor island (PHL)	SE Asia	yes	0	7	12	19	1.30103	0.583333		19		1.27875	0	0	0	0.056298	337.49	2.52826	628	44.79	9.18	9.18	1997	Hämäläinen, M., & Mueller, R. A. (1997). Synopsis of the Philippine Odonata, with lists of species recorded from forty islands. Odonatologica, 26, 249–315.
Slovakia	Europe	no	2	24	46	70	1.85126	0.521739	70		1.8451		2.85714	8.33333	4.07872e-05	0.00142755	49035	4.69051			48.15	48.15	2022	Sandall, E. L., Pinkert, S., & Jetz, W. (2022). Country‐level checklists and occurrences for the world’s Odonata (dragonflies and damselflies). Journal of Biogeography, 49(8), 1586–1598. https://doi.org/10.1111/jbi.14457
Slovenia	Europe	no	2	24	48	72	1.86332	0.5	72		1.85733		2.77778	8.33333	9.86631e-05	0.00355187	20271	4.30688			46.0514	46.0514	2022	Sandall, E. L., Pinkert, S., & Jetz, W. (2022). Country‐level checklists and occurrences for the world’s Odonata (dragonflies and damselflies). Journal of Biogeography, 49(8), 1586–1598. https://doi.org/10.1111/jbi.14457
Socotra islands (YEM)	Indian Ocean	yes	1	5	17	22	1.36173	0.294118		22		1.34242	4.54545	20	0.000263435	0.00579557	3796	3.57933	1503	235	12.51	12.51	2020	Van Damme, K., Vahalík, P., Ketelaar, R., Jeziorski, P., Bouwman, J., Morris, M., Suleiman, A. S., & Dumont, H. J. (2020). Dragonflies of dragon’s blood island: Atlas of the Odonata of the Socotra archipelago (Yemen). Rendiconti Lincei. Scienze Fisiche e Naturali, 31(3), 571–605. https://doi.org/10.1007/s12210-020-00942-6
Solomon	Melanesia	yes	1	11	53	64	1.81291	0.207547		64		1.80618	1.5625	9.09091	3.46069e-05	0.00221484	28896	4.46084	2335	977	-9.43194	9.43194	2013	Marinov, M., & Pikacha, P. (2013). On a dragonfly collection from the Solomon Islands with overview of fauna from this Pacific archipelago (Insecta: Odonata). Faunistic Studies in South-East Asian and Pacific Island Odonata, 4, 1–48.
Somalia	N Africa	no	1	26	67	93	1.97313	0.38806	93		1.96848		1.07527	3.84615	1.56824e-06	0.000145846	637657	5.80459			2.03333	2.03333	2022	Sandall, E. L., Pinkert, S., & Jetz, W. (2022). Country‐level checklists and occurrences for the world’s Odonata (dragonflies and damselflies). Journal of Biogeography, 49(8), 1586–1598. https://doi.org/10.1111/jbi.14457
South Africa	S Africa	no	1	66	137	203	2.30963	0.481752	203		2.3075		0.492611	1.51515	8.18976e-07	0.000166252	1221037	6.08673			-25.7461	25.7461	2005	Samways, M. J. (2008). Dragonflies and damselflies of South Africa. Sofia-Moscow: Pensoft publishers.
South Australia (AUS)	Oceania	no	2	17	32	49	1.69897	0.53125	49		1.6902		4.08163	11.7647	2.03186e-06	4.97805e-05	984321	5.99314			-34.9275	34.9275	2025	http://regions.ala.org.au
South Button island (IND)	Indian Ocean	yes	0	2	1	3	0.60206	2		3		0.477121	0	0	0	0.6	5	0.69897	7	12	12.2239	12.2239	2015	Sivaperuman, C. (2015). Odonata of Andaman and Nicobar Islands, India. In Aquatic Ecosystem: Biodiversity, Ecology and Conservation (pp. 153–162). https://doi.org/10.1007/978-81-322-2178-4
South Carolina (USA)	N America	no	6	48	115	163	2.21484	0.417391	163		2.21219		3.68098	12.5	7.23478e-05	0.00196545	82932.7	4.91873			34.0006	34.0006	2025	http://www.odonatacentral.org
South Dakota (USA)	N America	no	4	41	56	97	1.99123	0.732143	97		1.98677		4.12371	9.7561	2.00271e-05	0.000485658	199729	5.30044			44.3747	44.3747	2025	http://www.odonatacentral.org
South Georgia and the South Sandwich Islands	Atlantic ocean	yes	0	0	0	0	0	#DIV/0!		0			#DIV/0!	#DIV/0!	0	0	3903	3.5914	1370	1813	-54.2833	54.2833	2022	Sandall, E. L., Pinkert, S., & Jetz, W. (2022). Country‐level checklists and occurrences for the world’s Odonata (dragonflies and damselflies). Journal of Biogeography, 49(8), 1586–1598. https://doi.org/10.1111/jbi.14457
South Siberia (RUS)	N Asia	no	2	27	48	75	1.88081	0.5625	75		1.87506		2.66667	7.40741	7.32468e-07	2.74675e-05	2.7305e+06	6.43624			49.1356	49.1356	2019	Malikova, E. I., & Kosterin, O. E. (2019). Check-list of Odonata of the Russian Federation. Odonatologica, 48(1–2), 49–78. https://doi.org/10.5281/zenodo.2677689
South Sudan	E Africa	no	1	29	40	69	1.8451	0.725	69		1.83885		1.44928	3.44828	1.552e-06	0.000107088	644329	5.80911			4.85	4.85	2014	Dijkstra, K.-D. B., & Claustnizer, V. (2014). The dragonflies and damselflies of Eastern Africa. Tervuren: Royal Museum for Central Africa.
Southern Far East Russian Federation (RUS)	S Asia	no	2	29	62	91	1.96379	0.467742	91		1.95904		2.1978	6.89655	2.95768e-06	0.000134574	676206	5.83008			53.55	53.55	2019	Malikova, E. I., & Kosterin, O. E. (2019). Check-list of Odonata of the Russian Federation. Odonatologica, 48(1–2), 49–78. https://doi.org/10.5281/zenodo.2677689
Spain (Peninsular)	Europe	no	3	27	54	81	1.91381	0.5	81		1.90849		3.7037	11.1111	6.09539e-06	0.000164576	492175	5.69212			40.4333	40.4333	2024	Prunier, F., Miralles-Núñez, A., Zaldívar, C., Cabana, M., Torralba-Burrial, A., Luque, P., de Vega, L., & Cordero-Rivera, A. (2024). Nombres comunes de los odonatos para la conservación y la educación ambiental en España. Boletín de la SEA, 74, 190–200.
Sri Lanka	S Asia	yes	2	58	66	124	2.09691	0.878788		124		2.09342	1.6129	3.44828	2.97442e-05	0.00184414	67240	4.82763	2524	53	6.93333	6.93333	2014	Bedjanič, M., Conniff, K., van der Poorten, N., & Salamun, A. (2014). Dragonfly fauna of Sri Lanka. Pensoft Publishers.
Sudan	N Africa	no	2	26	47	73	1.86923	0.553191	73		1.86332		2.73973	7.69231	1.06041e-06	3.87049e-05	1886068	6.27556			15.6	15.6	2022	Sandall, E. L., Pinkert, S., & Jetz, W. (2022). Country‐level checklists and occurrences for the world’s Odonata (dragonflies and damselflies). Journal of Biogeography, 49(8), 1586–1598. https://doi.org/10.1111/jbi.14457
Sulawesi (IDN)	SE Asia	yes	1	59	78	137	2.13988	0.75641		137		2.13672	0.729927	1.69492	5.73341e-06	0.000785478	174416	5.24159	3478	117	-2	2	2024	Dow, R. A., Choong, C. Y., Grinang, J., Lupiyaningdyah, P., Ngiam, R. W. J., & Kalkman, V. J. (2024). Checklist of the Odonata (Insecta) of Sundaland and Wallacea (Malaysia, Singapore, Brunei, Indonesia and Timor Leste). Zootaxa, 5460(1), 1–122. https://doi.org/10.11646/zootaxa.5460.1.1
Sumatra (IDN)	SE Asia	no	2	112	152	264	2.42325	0.736842	264		2.4216		0.757576	1.78571	4.14691e-06	0.000547392	482287	5.68331	3805	52	0	0	2024	Dow, R. A., Choong, C. Y., Grinang, J., Lupiyaningdyah, P., Ngiam, R. W. J., & Kalkman, V. J. (2024). Checklist of the Odonata (Insecta) of Sundaland and Wallacea (Malaysia, Singapore, Brunei, Indonesia and Timor Leste). Zootaxa, 5460(1), 1–122. https://doi.org/10.11646/zootaxa.5460.1.1
Sumba (IDN)	SE Asia	yes	2	22	49	71	1.85733	0.44898		71		1.85126	2.8169	9.09091	0.000177876	0.0063146	11243.8	4.05091	1225	518	-9.66667	9.66667	2024	Dow, R. A., Choong, C. Y., Grinang, J., Lupiyaningdyah, P., Ngiam, R. W. J., & Kalkman, V. J. (2024). Checklist of the Odonata (Insecta) of Sundaland and Wallacea (Malaysia, Singapore, Brunei, Indonesia and Timor Leste). Zootaxa, 5460(1), 1–122. https://doi.org/10.11646/zootaxa.5460.1.1
Sumbawa (IDN)	SE Asia	yes	1	14	17	31	1.50515	0.823529		31		1.49136	3.22581	7.14286	6.52581e-05	0.002023	15323.8	4.18537	2850	267	-8.78333	8.78333	2024	Dow, R. A., Choong, C. Y., Grinang, J., Lupiyaningdyah, P., Ngiam, R. W. J., & Kalkman, V. J. (2024). Checklist of the Odonata (Insecta) of Sundaland and Wallacea (Malaysia, Singapore, Brunei, Indonesia and Timor Leste). Zootaxa, 5460(1), 1–122. https://doi.org/10.11646/zootaxa.5460.1.1
Suriname	S America	no	4	94	189	283	2.45332	0.497354	283		2.45179		1.41343	4.25532	2.4417e-05	0.00172751	163820	5.21437			5.83333	5.83333	2002	Belle, J. (2002). Commented checklist of the Odonata of Surinam. Odonatologica, 31(1), 1–8.
Svalbard and Jan Mayen islands (NOR)	Artic ocean	yes	0	0	0	0	0	#DIV/0!		0			#DIV/0!	#DIV/0!	0	0	61399	4.78816	1717	675	74	74	2022	Sandall, E. L., Pinkert, S., & Jetz, W. (2022). Country‐level checklists and occurrences for the world’s Odonata (dragonflies and damselflies). Journal of Biogeography, 49(8), 1586–1598. https://doi.org/10.1111/jbi.14457
Sweden	Europe	no	2	23	43	66	1.82607	0.534884	66		1.81954		3.0303	8.69565	4.44153e-06	0.000146571	450295	5.6535			59.35	59.35	2022	Sandall, E. L., Pinkert, S., & Jetz, W. (2022). Country‐level checklists and occurrences for the world’s Odonata (dragonflies and damselflies). Journal of Biogeography, 49(8), 1586–1598. https://doi.org/10.1111/jbi.14457
Switzerland	Europe	no	2	27	52	79	1.90309	0.519231	79		1.89763		2.53165	7.40741	4.84437e-05	0.00191353	41285	4.61579			46.95	46.95	2005	Gonseth, Y., Wildermuth, H., & Hrsg, A. M. (2005). Odonata. Die Libellen der Schweiz (Fauna Helv). Neuchâtel: CSCF/SEG.
Syria	W Asia	no	5	26	41	67	1.83251	0.634146	67		1.82607		7.46269	19.2308	2.70008e-05	0.00036181	185180	5.26759			33.5	33.5	2021	Boudot, Jean-Pierre, Borisov, Sergey, De Knijf, G., Van Grunsven, R. H. A., Schröter, A., & Kalkman, V. J. (2021). Atlas of the dragonflies and damselflies of West and Central Asia. 22 supplement, 1–247.
Taiwan	E Asia	yes	3	42	120	162	2.21219	0.35		162		2.20952	1.85185	7.14286	8.28798e-05	0.00447551	36197	4.55867	3952	140	25.0667	25.0667	1997	Wang, H. Y., & Heppner, J. B. (1997). Guidebook to dragonflies of Taiwan (Part 1). Taiwan.
Tajikistan	C Asia	no	5	20	36	56	1.75587	0.555556	56		1.74819		8.92857	25	3.49406e-05	0.000391335	143100	5.15564			38.55	38.55	2021	Boudot, Jean-Pierre, Borisov, Sergey, De Knijf, G., Van Grunsven, R. H. A., Schröter, A., & Kalkman, V. J. (2021). Atlas of the dragonflies and damselflies of West and Central Asia. 22 supplement, 1–247.
Tanzania	E Africa	no	1	75	143	218	2.34044	0.524476	218		2.33846		0.458716	1.33333	1.05563e-06	0.000230127	947303	5.97649			-6.16667	6.16667	2022	Sandall, E. L., Pinkert, S., & Jetz, W. (2022). Country‐level checklists and occurrences for the world’s Odonata (dragonflies and damselflies). Journal of Biogeography, 49(8), 1586–1598. https://doi.org/10.1111/jbi.14457
Tasmania (AUS)	Oceania	yes	2	12	16	28	1.4624	0.75		28		1.44716	7.14286	16.6667	2.92389e-05	0.000409345	68402	4.83507	1617	204	-42.8806	42.8806	2024	Forteath, N. (2024). A photographic guide to the dragonflies and samselflies of Tasmania. Forty South Publishing.
Taveuni (FJI)	Melanesia	yes	1	10	5	15	1.20412	2		15		1.17609	6.66667	10	0.00230415	0.0345622	434	2.63749	1241	7.64	-16.8	16.8	2024	Donnelly, T. W., & Marinov, M. (2024). The Fijian genus Nesobasis Selys, 1891 Part 2: Revision in comparison to Nikoulabasis Ferguson et al., 2023 with particular emphasis on Vanua Levu, Taveuni, Koro and erection of 10 new species and one subspecies (Odonata: Coenagrionidae). Megataxa, 14(1), 1–266. https://doi.org/10.11646/megataxa.14.1.1
Tawi-Tawi island (PHL)	SE Asia	yes	1	11	43	54	1.74036	0.255814		54		1.73239	1.85185	9.09091	0.00172265	0.0930233	580.5	2.7638	552	55.65	5.2	5.2	2012	Villanueva, R. J. T., & Cahilog, H. (2012). Notes on a small Odonata collection from Tawi-Tawi, Sanga-Sanga and Jolo islands, Philippines. International Dragonfly Fund - Report, 55, 1–32.
Tenerife (ESP)	Macaronesia	yes	2	3	7	10	1.04139	0.428571		10		1	20	66.6667	9.88417e-05	0.000494208	20234.4	4.30609	3715	297	28.2686	28.2686	2016	Weihrauch, F., Vieira, V., Cordero-Rivera, A., & de Santos Loureiro, N. (2016). Update on the zoogeography of Odonata in the Macaronesian Islands. Boletín ROLA, 8, 9–22.
Tennessee (USA)	N America	no	6	48	119	167	2.22531	0.403361	167		2.22272		3.59281	12.5	5.49214e-05	0.00152865	109247	5.03841			36.1622	36.1622	2025	http://www.odonatacentral.org
Terceira (PRT)	Macaronesia	yes	2	2	2	4	0.69897	1		4		0.60206	50	100	0.0049965	0.009993	400.28	2.60236	1021.2	1525	38.7278	38.7278	2016	Weihrauch, F., Vieira, V., Cordero-Rivera, A., & de Santos Loureiro, N. (2016). Update on the zoogeography of Odonata in the Macaronesian Islands. Boletín ROLA, 8, 9–22.
Texas (USA)	N America	no	10	84	167	251	2.4014	0.502994	251		2.39967		3.98406	11.9048	1.43748e-05	0.000360807	695662	5.8424			30.2672	30.2672	2025	http://www.odonatacentral.org
Thailand	SE Asia	no	3	153	204	357	2.55388	0.75	357		2.55267		0.840336	1.96078	5.84659e-06	0.000695744	513120	5.71022			13.8	13.8	1999	Hämäläinen, M., & Pinratana, A. (1999). Atlas of the dragonflies of Thailand. Distribution maps by provinces. Bangkok: Brothers of St. Gabriel.
Ticao island (PHL)	SE Asia	yes	0	6	7	13	1.14613	0.857143		13		1.11394	0	0	0	0.0389222	334	2.52375	228.9	16.99	12.5292	12.5292	1997	Hämäläinen, M., & Mueller, R. A. (1997). Synopsis of the Philippine Odonata, with lists of species recorded from forty islands. Odonatologica, 26, 249–315.
Timor island (IDN-TLS)	SE Asia	yes	3	16	37	53	1.73239	0.432432		53		1.72428	5.66038	18.75	0.000200669	0.00354515	14950	4.17464	2963	550	-8.55	8.55	2024	Dow, R. A., Choong, C. Y., Grinang, J., Lupiyaningdyah, P., Ngiam, R. W. J., & Kalkman, V. J. (2024). Checklist of the Odonata (Insecta) of Sundaland and Wallacea (Malaysia, Singapore, Brunei, Indonesia and Timor Leste). Zootaxa, 5460(1), 1–122. https://doi.org/10.11646/zootaxa.5460.1.1
Tobago (TTO)	Caribean	yes	1	7	18	25	1.41497	0.388889		25		1.39794	4	14.2857	0.00333333	0.0833333	300	2.47712	550	105.1	11.1833	11.1833	2022	Starr, C. K., & Hardy, J. D. (2022). Checklist of the Known Insects of Tobago, West Indies. Living World, 2022, 1–11.
Togo	W Africa	no	1	35	65	100	2.00432	0.538462	100		2		1	2.85714	1.76103e-05	0.00176103	56785	4.75423			6.13333	6.13333	2022	Sandall, E. L., Pinkert, S., & Jetz, W. (2022). Country‐level checklists and occurrences for the world’s Odonata (dragonflies and damselflies). Journal of Biogeography, 49(8), 1586–1598. https://doi.org/10.1111/jbi.14457
Tokelau (NZL)	Polynesia	yes	0	0	1	1	0.30103	0		1		0	0	#DIV/0!	0	0.4	2.5	0.39794	5	1156	-8.55722	8.55722	2022	Sandall, E. L., Pinkert, S., & Jetz, W. (2022). Country‐level checklists and occurrences for the world’s Odonata (dragonflies and damselflies). Journal of Biogeography, 49(8), 1586–1598. https://doi.org/10.1111/jbi.14457
Tonga	Polynesia	yes	2	5	12	17	1.25527	0.416667		17		1.23045	11.7647	40	0.0026738	0.0227273	748	2.8739	1033	725	-21.1333	21.1333	2013	Marinov, M. (2012). Odonata from the Kingdom of Tonga, with a description of Pseudagrion microcephalum stainbergerorum spp. Nov. (Zygoptera: Coenagrionidae). Odonatologica, 41(3), 225–243. / Marinov, M., & Donnelly, T. (2013). Teinobasis fatakula sp. Nov. (Zygoptera: Coenagrionidae), found on ‘Eua Island, Kingdom of Tonga. Zootaxa, 3609(6), 1–4.
Trinidad (TTO)	Caribean	yes	2	29	90	119	2.07918	0.322222		119		2.07555	1.68067	6.89655	0.000419463	0.0249581	4768	3.67834	940	14.8	10.5	10.5	1988	Michalski, J. (1988). A catalogue and field guide to the dragonflies of Trinidad (Order Odonata). Occasional Papers of the Zoology Department of the University of the West Indies, 6, 1–146.
Tristan da Cunha (GBR)	Atlantic ocean	yes	0	0	1	1	0.30103	0		1		0	0	#DIV/0!	0	0.00483092	207	2.31597	2062	2790	-37.0675	37.0675	1965	Holdgate, M. W. (1965). The fauna of the Tristan da Cunha islands. Philosophical Transactions of the Royal Society B: Biological Sciences, 249, 361–402.
Tucumán province (ARG)	S America	no	3	21	52	73	1.86923	0.403846	73		1.86332		4.10959	14.2857	0.000133191	0.00324099	22524	4.35265			-26.64	26.64	2013	Rodríguez, J. S., & Molineri, C. (2013). Diversidad del orden Odonata (Fabricius, 1793) en la provincia de Tucumán, Argentina. Acta zoológica lilloana, 57(1), 22–30.
Tunisia	N Africa	no	4	20	37	57	1.76343	0.540541	57		1.75587		7.01754	20	2.44484e-05	0.000348389	163610	5.21381			36.8167	36.8167	2022	Sandall, E. L., Pinkert, S., & Jetz, W. (2022). Country‐level checklists and occurrences for the world’s Odonata (dragonflies and damselflies). Journal of Biogeography, 49(8), 1586–1598. https://doi.org/10.1111/jbi.14457
Turkey	W Asia	no	6	32	66	98	1.99564	0.484848	98		1.99123		6.12245	18.75	7.65734e-06	0.00012507	783562	5.89407			39.9167	39.9167	2021	Boudot, Jean-Pierre, Borisov, Sergey, De Knijf, G., Van Grunsven, R. H. A., Schröter, A., & Kalkman, V. J. (2021). Atlas of the dragonflies and damselflies of West and Central Asia. 22 supplement, 1–247.
Turkmenistan	C Asia	no	6	16	36	52	1.72428	0.444444	52		1.716		11.5385	37.5	1.22147e-05	0.000105861	491210	5.69127			37.9667	37.9667	2021	Boudot, Jean-Pierre, Borisov, Sergey, De Knijf, G., Van Grunsven, R. H. A., Schröter, A., & Kalkman, V. J. (2021). Atlas of the dragonflies and damselflies of West and Central Asia. 22 supplement, 1–247.
Turks and Caicos Islands (GBR)	Caribean	yes	1	1	7	8	0.954243	0.142857		8		0.90309	12.5	100	0.00105485	0.00843882	948	2.97681	48	219	21.459	21.459	1960	Westfall, M. J. (1960). The Odonata of the Bahama islands, the West Indies. American Museum Novitates, 2020, 1–12.
Tuvalu	Polynesia	yes	1	1	1	2	0.477121	1		2		0.30103	50	100	0.0384615	0.0769231	26	1.41497	4.6	835	-8.51667	8.51667	2022	Sandall, E. L., Pinkert, S., & Jetz, W. (2022). Country‐level checklists and occurrences for the world’s Odonata (dragonflies and damselflies). Journal of Biogeography, 49(8), 1586–1598. https://doi.org/10.1111/jbi.14457
Uganda	E Africa	no	1	89	175	264	2.42325	0.508571	264		2.4216		0.378788	1.1236	4.14872e-06	0.00109526	241038	5.38209			0.313611	0.313611	2022	Sandall, E. L., Pinkert, S., & Jetz, W. (2022). Country‐level checklists and occurrences for the world’s Odonata (dragonflies and damselflies). Journal of Biogeography, 49(8), 1586–1598. https://doi.org/10.1111/jbi.14457
Ukraine	Europe	no	2	27	49	76	1.88649	0.55102	76		1.88081		2.63158	7.40741	3.3133e-06	0.000125905	603628	5.78077			49	49	2022	Sandall, E. L., Pinkert, S., & Jetz, W. (2022). Country‐level checklists and occurrences for the world’s Odonata (dragonflies and damselflies). Journal of Biogeography, 49(8), 1586–1598. https://doi.org/10.1111/jbi.14457
United Arab Emirates	W Asia	no	4	8	22	30	1.49136	0.363636	30		1.47712		13.3333	50	4.78469e-05	0.000358852	83600	4.92221			24.4667	24.4667	2021	Boudot, Jean-Pierre, Borisov, Sergey, De Knijf, G., Van Grunsven, R. H. A., Schröter, A., & Kalkman, V. J. (2021). Atlas of the dragonflies and damselflies of West and Central Asia. 22 supplement, 1–247.
United States Minor Outlying Islands (USA)	Oceania	yes	1	1	3	4	0.69897	0.333333		4		0.60206	25	100	0.0203004	0.0812018	49.26	1.69249	8	3100	19.2953	19.2953	2022	Sandall, E. L., Pinkert, S., & Jetz, W. (2022). Country‐level checklists and occurrences for the world’s Odonata (dragonflies and damselflies). Journal of Biogeography, 49(8), 1586–1598. https://doi.org/10.1111/jbi.14457
Ural (RUS)	Europe-Asia	no	3	27	47	74	1.87506	0.574468	74		1.86923		4.05405	11.1111	3.62565e-06	8.94327e-05	827438	5.91774			60	60	2019	Malikova, E. I., & Kosterin, O. E. (2019). Check-list of Odonata of the Russian Federation. Odonatologica, 48(1–2), 49–78. https://doi.org/10.5281/zenodo.2677689
Uruguay	S America	no	1	27	43	70	1.85126	0.627907	70		1.8451		1.42857	3.7037	5.67489e-06	0.000397242	176215	5.24604			-34.8833	34.8833	2009	von Ellenrieder, N., Molineri, C., & Emmerich, D. (2009). Odonata de Uruguay: lista de especies y nuevos registros. Revista de La Sociedad Entomologica Argentina, 68(1–2), 227–230.
Utah (USA)	N America	no	6	37	62	99	2	0.596774	99		1.99564		6.06061	16.2162	2.72867e-05	0.000450231	219887	5.3422			40.7608	40.7608	2025	http://www.odonatacentral.org
Uzbekistan	C Asia	no	6	18	34	52	1.72428	0.529412	52		1.716		11.5385	33.3333	1.34108e-05	0.000116227	447400	5.6507			41.3167	41.3167	2021	Boudot, Jean-Pierre, Borisov, Sergey, De Knijf, G., Van Grunsven, R. H. A., Schröter, A., & Kalkman, V. J. (2021). Atlas of the dragonflies and damselflies of West and Central Asia. 22 supplement, 1–247.
Vanua Levu (FJI)	Melanesia	yes	0	15	4	19	1.30103	3.75		19		1.27875	0	0	0	0.00340075	5587	3.74718	1032	1428	-16.5833	16.5833	2024	Donnelly, T. W., & Marinov, M. (2024). The Fijian genus Nesobasis Selys, 1891 Part 2: Revision in comparison to Nikoulabasis Ferguson et al., 2023 with particular emphasis on Vanua Levu, Taveuni, Koro and erection of 10 new species and one subspecies (Odonata: Coenagrionidae). Megataxa, 14(1), 1–266. https://doi.org/10.11646/megataxa.14.1.1
Vanuatu	Melanesia	yes	2	11	21	32	1.51851	0.52381		32		1.50515	6.25	18.1818	0.000164082	0.00262532	12189	4.08597	1879	575	-17.7333	17.7333	2019	Marinov, M., Bybee, S., Doscher, C., & Kalfatakmolis, D. (2019). Faunistic studies on Odonata of the Republic of Vanuatu (Insecta: Odonata). Faunistic Studies in South-East Asian and Pacific Island Odonata, 26, 1–46.
Venezuela	S America	no	3	214	334	548	2.73957	0.640719	548		2.73878		0.547445	1.40187	3.27352e-06	0.000597963	916445	5.96211			10.4806	10.4806	2022	Sandall, E. L., Pinkert, S., & Jetz, W. (2022). Country‐level checklists and occurrences for the world’s Odonata (dragonflies and damselflies). Journal of Biogeography, 49(8), 1586–1598. https://doi.org/10.1111/jbi.14457
Vermont (USA)	N America	no	4	45	101	146	2.16732	0.445545	146		2.16435		2.73973	8.88889	0.000160494	0.00585804	24923	4.3966			44.2594	44.2594	2025	http://www.odonatacentral.org
Victoria	Oceania	no	2	33	60	93	1.97313	0.55	93		1.96848		2.15054	6.06061	8.79337e-06	0.000408892	227444	5.35687			-37.8142	37.8142	2025	http://regions.ala.org.au
Vietnam	SE Asia	no	3	153	177	330	2.51983	0.864407	330		2.51851		0.909091	1.96078	9.05401e-06	0.000995941	331345	5.52028			21.0333	21.0333	2022	Sandall, E. L., Pinkert, S., & Jetz, W. (2022). Country‐level checklists and occurrences for the world’s Odonata (dragonflies and damselflies). Journal of Biogeography, 49(8), 1586–1598. https://doi.org/10.1111/jbi.14457
Virgin islands (GBR-USA)	Caribean	yes	1	5	20	25	1.41497	0.25		25		1.39794	4	20	0.00150489	0.0376223	664.5	2.82249	474	791.3	18.2	18.2	2022	Sandall, E. L., Pinkert, S., & Jetz, W. (2022). Country‐level checklists and occurrences for the world’s Odonata (dragonflies and damselflies). Journal of Biogeography, 49(8), 1586–1598. https://doi.org/10.1111/jbi.14457
Virginia (USA)	N America	no	6	54	143	197	2.29667	0.377622	197		2.29447		3.04569	11.1111	5.41586e-05	0.00177821	110786	5.04448			37.5408	37.5408	2025	http://www.odonatacentral.org
Viti Levu (FJI)	Melanesia	yes	2	32	14	46	1.6721	2.28571		46		1.66276	4.34783	6.25	0.00019253	0.00442819	10388	4.01653	1324	1232	-17.8	17.8	2024	Donnelly, T. W., & Marinov, M. (2024). The Fijian genus Nesobasis Selys, 1891 Part 2: Revision in comparison to Nikoulabasis Ferguson et al., 2023 with particular emphasis on Vanua Levu, Taveuni, Koro and erection of 10 new species and one subspecies (Odonata: Coenagrionidae). Megataxa, 14(1), 1–266. https://doi.org/10.11646/megataxa.14.1.1 / Marinov, M., & Waqa-Sakiti, H. (2013). An illustrated …
Wallis (FRA)	Polynesia	yes	1	3	11	14	1.17609	0.272727		14		1.14613	7.14286	33.3333	0.0104167	0.145833	96	1.98227	524	275	-13.3	13.3	2021	Marinov, M., Jacquier, R. K., Duvernay, J. M., Gorlier, J. V., Mary, N., Doscher, C., Bail, F. L., Jourdan, H., & Theuerkauf, J. (2021). An update of the Odonata fauna of Wallis & Futuna (Insecta: Odonata). Faunistic Studies in South-East Asian and Pacific Island Odonata, 35, 35–67.
Washington (USA)	N America	no	3	21	61	82	1.91908	0.344262	82		1.91381		3.65854	14.2857	1.62314e-05	0.000443658	184827	5.26677			47.0378	47.0378	2025	http://www.odonatacentral.org
West Bengal (IND)	S Asia	no	4	91	147	239	2.38021	0.619048	239		2.3784		1.67364	4.3956	4.50694e-05	0.0026929	88752	4.94818			22.57	22.57	2022	Dawn, P. (2022). Dragonflies and damselflies (Insecta: Odonata) of West Bengal, an annotated list of species. Oriental Insects, 56(1), 81–117. https://doi.org/10.1080/00305316.2021.1908188
West Siberian Lowland (RUS)	Europe-Asia	no	2	21	35	56	1.75587	0.6	56		1.74819		3.57143	9.52381	7.59216e-07	2.1258e-05	2.6343e+06	6.42066			62	62	2019	Malikova, E. I., & Kosterin, O. E. (2019). Check-list of Odonata of the Russian Federation. Odonatologica, 48(1–2), 49–78. https://doi.org/10.5281/zenodo.2677689
West Virginia (USA)	N America	no	5	46	99	145	2.16435	0.464646	145		2.16137		3.44828	10.8696	7.96749e-05	0.00231057	62755	4.79765			38.3498	38.3498	2025	http://www.odonatacentral.org
Western Australia (AUS)	Oceania	no	3	40	71	111	2.04922	0.56338	111		2.04532		2.7027	7.5	1.18717e-06	4.39254e-05	2527013	6.40261			-31.9558	31.9558	2025	http://regions.ala.org.au
Western Sahara	N Africa	no	3	9	17	26	1.43136	0.529412	26		1.41497		11.5385	33.3333	1.10294e-05	9.55882e-05	272000	5.43457			27.15	27.15	2022	Sandall, E. L., Pinkert, S., & Jetz, W. (2022). Country‐level checklists and occurrences for the world’s Odonata (dragonflies and damselflies). Journal of Biogeography, 49(8), 1586–1598. https://doi.org/10.1111/jbi.14457
Wisconsin (USA)	N America	no	4	48	118	166	2.22272	0.40678	166		2.22011		2.40964	8.33333	2.35793e-05	0.000978543	169640	5.22953			43.0747	43.0747	2025	http://www.odonatacentral.org
Wyoming (USA)	N America	no	4	34	47	81	1.91381	0.723404	81		1.90849		4.93827	11.7647	1.57894e-05	0.000319735	253335	5.4037			41.14	41.14	2025	http://www.odonatacentral.org
Yap (FSM)	Micronesia	yes	1	2	13	15	1.20412	0.153846		15		1.17609	6.66667	50	0.0102041	0.153061	98	1.99123	178	1230	9.52	9.52	2011	Buden, D. W., & Paulson, D. R. (2007). Odonata of Yap, Western Caroline Islands, Micronesia. Pacific Science, 61(2), 267–277. https://doi.org/10.2984/1534-6188(2007)61[267:OOYWCI]2.0.CO;2 / Buden, D. W. (2011). The Odonata of Fais Island and Ulithi and Woleai Atolls, Yap State, Western Caroline Islands, Federated States of Micronesia. Micronesica, 41(2), 215–222.
Yemen	W Asia	no	2	13	32	45	1.66276	0.40625	45		1.65321		4.44444	15.3846	4.39075e-06	9.87919e-05	455503	5.65849			15.3483	15.3483	2021	Boudot, Jean-Pierre, Borisov, Sergey, De Knijf, G., Van Grunsven, R. H. A., Schröter, A., & Kalkman, V. J. (2021). Atlas of the dragonflies and damselflies of West and Central Asia. 22 supplement, 1–247.
Yukon (CAN)	N America	no	0	6	28	34	1.54407	0.214286	34		1.53148		0	0	0	7.04746e-05	482443	5.68345			60.7242	60.7242	2025	http://www.odonatacentral.org
Yungas (ARG)	S America	no	3	32	71	103	2.01703	0.450704	103		2.01284		2.91262	9.375	4.90998e-05	0.00168576	61100	4.78604			-23.65	23.65	2009	Von Ellenrieder, N. (2009). Odonata of the Argentine Yungas cloud forest: distribution patterns and conservation status. Odonatologica, 38(1), 39–53.
Zambia	S Africa	no	1	97	175	272	2.43616	0.554286	272		2.43457		0.367647	1.03093	1.3287e-06	0.000361406	752617	5.87657			-15.4167	15.4167	2022	Sandall, E. L., Pinkert, S., & Jetz, W. (2022). Country‐level checklists and occurrences for the world’s Odonata (dragonflies and damselflies). Journal of Biogeography, 49(8), 1586–1598. https://doi.org/10.1111/jbi.14457
Zimbabwe	S Africa	no	1	60	106	166	2.22272	0.566038	166		2.22011		0.60241	1.66667	2.55914e-06	0.000424816	390757	5.59191			-17.8292	17.8292	2025	Sandall, E. L., Pinkert, S., & Jetz, W. (2022). Country‐level checklists and occurrences for the world’s Odonata (dragonflies and damselflies). Journal of Biogeography, 49(8), 1586–1598. https://doi.org/10.1111/jbi.14457
Countries/archipelagos included as regions/states/islands
American Samoa (USA)	Polynesia	yes	1	1	1	2	0.477121	1					50	100	0.112994	0.225989	8.85	0.946943	653		-14.2739	14.2739	2022	Sandall, E. L., Pinkert, S., & Jetz, W. (2022). Country‐level checklists and occurrences for the world’s Odonata (dragonflies and damselflies). Journal of Biogeography, 49(8), 1586–1598. https://doi.org/10.1111/jbi.14457
Antigua-Barbuda	Caribean	yes	3	4	8	12	1.11394	0.5					25	75	0.00681818	0.0272727	440	2.64345	402	692	17.1167	17.1167	2022	Sandall, E. L., Pinkert, S., & Jetz, W. (2022). Country‐level checklists and occurrences for the world’s Odonata (dragonflies and damselflies). Journal of Biogeography, 49(8), 1586–1598. https://doi.org/10.1111/jbi.14457
Argentina	S America	no	3	99	183	282	2.45179	0.540984					1.06383	3.0303	1.07898e-06	0.000101424	2780400	6.44411			-34.67	34.67	2020	Lozano, F., Del Palacio, A., Ramos, L., & Muzón, J. (2020). The Odonata of Argentina: State of knowledge and updated checklist. International Journal of Odonatology, 23(2), 113–153. https://doi.org/10.1080/13887890.2020.1737585
Australia	Oceania	no	3	116	220	336	2.52763	0.527273					0.892857	2.58621	3.90014e-07	4.36816e-05	7692024	6.88604			-34.7	34.7	2022	Sandall, E. L., Pinkert, S., & Jetz, W. (2022). Country‐level checklists and occurrences for the world’s Odonata (dragonflies and damselflies). Journal of Biogeography, 49(8), 1586–1598. https://doi.org/10.1111/jbi.14457
Azores (PRT)	Macaronesia	yes	2	2	3	5	0.778151	0.666667					40	100	0.000857265	0.00214316	2333	3.36791	2351	1430	37.7411	37.7411	2016	Weihrauch, F., Vieira, V., Cordero-Rivera, A., & de Santos Loureiro, N. (2016). Update on the zoogeography of Odonata in the Macaronesian Islands. Boletín ROLA, 8, 9–22.
Balearic islands (ESP)	Europe	yes	2	12	19	31	1.50515	0.631579					6.45161	16.6667	0.000396825	0.00615079	5040	3.70243	1436		39.5	39.5	2022	Rebassa, M., & Canyelles, X. (2022). Actualització de l’estatus dels odonats de les Illes Balears. Un repàs a la seva situació des de començaments del segle XX fins a l’actualitat. Bolletí de La Societat d’Història Natural de Les Balears, 65, 97–115.
Brazil	S America	no	3	428	435	863	2.93651	0.983908					0.347625	0.700935	3.52325e-07	0.000101352	8514877	6.93018			-14.25	14.25	2022	Sandall, E. L., Pinkert, S., & Jetz, W. (2022). Country‐level checklists and occurrences for the world’s Odonata (dragonflies and damselflies). Journal of Biogeography, 49(8), 1586–1598. https://doi.org/10.1111/jbi.14457
Canada	N America	no	8	64	159	223	2.35025	0.402516					3.58744	12.5	8.01228e-07	2.23342e-05	9984670	6.99933			45.4	45.4	2022	Sandall, E. L., Pinkert, S., & Jetz, W. (2022). Country‐level checklists and occurrences for the world’s Odonata (dragonflies and damselflies). Journal of Biogeography, 49(8), 1586–1598. https://doi.org/10.1111/jbi.14457
Canaries (ESP)	Macaronesia	yes	2	3	12	15	1.20412	0.25					13.3333	66.6667	0.000268565	0.00201423	7447	3.87198	3715	100	28.1	28.1	2016	Weihrauch, F., Vieira, V., Cordero-Rivera, A., & de Santos Loureiro, N. (2016). Update on the zoogeography of Odonata in the Macaronesian Islands. Boletín ROLA, 8, 9–22.
China	Asia	no	7	299	519	818	2.91328	0.576108					0.855746	2.34114	7.29398e-07	8.52353e-05	9596961	6.98213			39.9167	39.9167	2022	Sandall, E. L., Pinkert, S., & Jetz, W. (2022). Country‐level checklists and occurrences for the world’s Odonata (dragonflies and damselflies). Journal of Biogeography, 49(8), 1586–1598. https://doi.org/10.1111/jbi.14457 / Seehausen, M. (2014). New to the fauna of Hong Kong: Matrona basilaris Selys, 1853 (Odonata: Calopterygidae). International Dragonfly Fund - Report, 65, 3–5.
Comoros	S Africa	yes	1	11	32	43	1.64345	0.34375					2.32558	9.09091	0.000447227	0.0192308	2236	3.34947	2361		-11.69	11.69	2012	Couteyen, S., & Papazian, M. (2012). Catalogue et affinités géographiques des Odonata des îles voisines de Madagascar (Insecta: Pterygota). Annales de La Société Entomologique de France (Nouvelle Série), 48(1-2), 199–215.
Fiji	Melanesia	yes	2	54	17	71	1.85733	3.17647					2.8169	3.7037	0.000109445	0.0038853	18274	4.26183	1324	1232	-18.15	18.15	2024	Donnelly, T. W., & Marinov, M. (2024). The Fijian genus Nesobasis Selys, 1891 Part 2: Revision in comparison to Nikoulabasis Ferguson et al., 2023 with particular emphasis on Vanua Levu, Taveuni, Koro and erection of 10 new species and one subspecies (Odonata: Coenagrionidae). Megataxa, 14(1), 1–266. https://doi.org/10.11646/megataxa.14.1.1 / and Milen Marinov, pers. comm.
Galapagos (ECU)	Pacific Ocean	yes	1	1	8	8	0.954243	0.125					12.5	100	0.000126904	0.00101523	7880	3.89653	1707	900	-0.5	0.5	2013	Peck, S. B. (2013). CDF Checklist of Galapagos Dragonflies and Damselflies. In F. Bungartz, H. Herrera, P. Jaramillo, N. Tirado, G. Jímenez-Uzcategui, D. Ruiz, A. Guézou, & F. Ziemmeck (Eds.), Charles Darwin Foundation Galapagos Species Checklist—Lista de Especies de Galápagos de la Fundación Charles Darwin (pp. 1–3). Charles Darwin Foundation / Fundación Charles Darwin.
India	Asia	no	8	214	289	504	2.70329	0.740484					1.5873	3.73832	2.43339e-06	0.000153304	3287595	6.51688			28.57	28.57	2024	Subramanian, K. A., & Babu, R. (2024). Fauna of India Checklist: Arthropoda: Insecta: Odonata (Version 1.0) [Dataset]. https://doi.org/10.26515/Fauna/1/2023/Arthropoda: Insecta:Odonata
Indonesia	Oceania	yes	10	436	301	737	2.86806	1.4485					1.35685	2.29358	5.25053e-06	0.000386964	1904569	6.2798	4884		-6.16667	6.16667	2022	Sandall, E. L., Pinkert, S., & Jetz, W. (2022). Country‐level checklists and occurrences for the world’s Odonata (dragonflies and damselflies). Journal of Biogeography, 49(8), 1586–1598. https://doi.org/10.1111/jbi.14457 / Seehausen, M. (2014). New to the fauna of Hong Kong: Matrona basilaris Selys, 1853 (Odonata: Calopterygidae). International Dragonfly Fund - Report, 65, 3–5.
Lesser Antilles	C America	yes	3	12	34	46	1.6721	0.352941					6.52174	25	0.000230556	0.0035352	13012	4.11434			15.3	15.3	2012	Meurgey, F., & Poiron, C. (2012). An updated checklist of Lesser Antillean Odonata. International Journal of Odonatology, 15(4), 305–316.
Micronesia, Federated States of	Micronesia	yes	2	13	22	35	1.5563	0.590909					5.71429	15.3846	0.002849	0.0498575	702	2.84634	791		6.91667	6.91667	2022	Sandall, E. L., Pinkert, S., & Jetz, W. (2022). Country‐level checklists and occurrences for the world’s Odonata (dragonflies and damselflies). Journal of Biogeography, 49(8), 1586–1598. https://doi.org/10.1111/jbi.14457
Philippines	SE Asia	yes	2	193	113	306	2.48714	1.70796					0.653595	1.03627	6.66667e-06	0.00102	300000	5.47712	2954		14.5958	14.5958	2022	Sandall, E. L., Pinkert, S., & Jetz, W. (2022). Country‐level checklists and occurrences for the world’s Odonata (dragonflies and damselflies). Journal of Biogeography, 49(8), 1586–1598. https://doi.org/10.1111/jbi.14457
Russian Federation	Europe-Asia	no	5	50	105	155	2.19312	0.47619					3.22581	10	2.92428e-07	9.06526e-06	17098246	7.23295			55.7558	55.7558	2022	Sandall, E. L., Pinkert, S., & Jetz, W. (2022). Country‐level checklists and occurrences for the world’s Odonata (dragonflies and damselflies). Journal of Biogeography, 49(8), 1586–1598. https://doi.org/10.1111/jbi.14457 / Seehausen, M. (2014). New to the fauna of Hong Kong: Matrona basilaris Selys, 1853 (Odonata: Calopterygidae). International Dragonfly Fund - Report, 65, 3–5.
Trinidad-Tobago	S America	yes	2	36	95	131	2.12057	0.378947					1.52672	5.55556	0.000389788	0.0255311	5131	3.7102	940		10.6667	10.6667	2022	Sandall, E. L., Pinkert, S., & Jetz, W. (2022). Country‐level checklists and occurrences for the world’s Odonata (dragonflies and damselflies). Journal of Biogeography, 49(8), 1586–1598. https://doi.org/10.1111/jbi.14457
USA	N America	no	14	154	336	490	2.69108	0.458333					2.85714	9.09091	1.4237e-06	4.98296e-05	9833520	6.99271			38.88	38.88	2025	http://www.odonatacentral.org
Excluded for diverse reasons
Betangan island (IDN)	SE Asia	yes	1	21	35	56	1.75587	0.6		56			1.78571	4.7619	0.190114	10.6464	5.26	0.720986	4	3.34	-2.98652	2.98652	2019	Alfarisyi, A. (2019). Odonata survey on some of the outer islands of Belitung Regency, Belitung island, Indonesia. Faunistic Studies in South-East Asian and Pacific Island Odonata, 29, 1–34.
Burung island (IDN)	SE Asia	yes	0	3	15	18	1.27875	0.2		18			0	0	0	138.462	0.13	-0.886057	19	2.27	-2.56998	2.56998	2019	Alfarisyi, A. (2019). Odonata survey on some of the outer islands of Belitung Regency, Belitung island, Indonesia. Faunistic Studies in South-East Asian and Pacific Island Odonata, 29, 1–34.
Kampak island (IDN)	SE Asia	yes	1	13	30	43	1.64345	0.433333		43			2.32558	7.69231	0.248139	10.67	4.03	0.605305	17	4	-3.10995	3.10995	2019	Alfarisyi, A. (2019). Odonata survey on some of the outer islands of Belitung Regency, Belitung island, Indonesia. Faunistic Studies in South-East Asian and Pacific Island Odonata, 29, 1–34.
Kepayang island (IDN)	SE Asia	yes	0	3	18	21	1.34242	0.166667		21			0	0	0	140	0.15	-0.823909	17	1.12	-2.54771	2.54771	2019	Alfarisyi, A. (2019). Odonata survey on some of the outer islands of Belitung Regency, Belitung island, Indonesia. Faunistic Studies in South-East Asian and Pacific Island Odonata, 29, 1–34.
Kuruva (IDN)	SE Asia	no	1	27	32	59	1.77815	0.84375					1.69492	3.7037	0.263158	15.5263	3.8	0.579784			11.8217	11.8217	2025	Chandran, A. V., Muneer, P. K., Madhavan, M., & Jose, S. K. (2025). Odonata diversity of the Kuruva Islands, southern India, with notes on the ecology of Disparoneura apicalis (Fraser, 1924) (Odonata: Platycnemididae). Journal of Insect Biodiversity and Systematics, 11(1), 207–226. https://doi.org/10.61186/jibs.11.1.207
Lenkguas island (IDN)	SE Asia	yes	0	1	12	13	1.14613	0.0833333		13			0	0	0	433.333	0.03	-1.52288	11	4.84	-2.537	2.537	2019	Alfarisyi, A. (2019). Odonata survey on some of the outer islands of Belitung Regency, Belitung island, Indonesia. Faunistic Studies in South-East Asian and Pacific Island Odonata, 29, 1–34.
Marambaia (BRA)	S America	yes	2	22	55	77	1.89209	0.4					2.5974	9.09091	0.047619	1.83333	42	1.62325	641	9.7	-23.05	23.05	2006	Anjos-Santos, D., & Costa, J. M. (2006). A revised checklist of Odonata (Insecta) from Marambaia, Rio de Janeiro, Brazil with eight new records. Zootaxa, 1300, 37–50.
Monaco	Europe	no	1	2	2	4	0.69897	1					25	50	0.480769	1.92308	2.08	0.318063			43.7311	43.7311	2022	Sandall, E. L., Pinkert, S., & Jetz, W. (2022). Country‐level checklists and occurrences for the world’s Odonata (dragonflies and damselflies). Journal of Biogeography, 49(8), 1586–1598. https://doi.org/10.1111/jbi.14457
Rengit island (IDN)	SE Asia	yes	1	12	17	29	1.47712	0.705882		29			3.44828	8.33333	0.431034	12.5	2.32	0.365488	4	0.5	-2.94	2.94	2019	Alfarisyi, A. (2019). Odonata survey on some of the outer islands of Belitung Regency, Belitung island, Indonesia. Faunistic Studies in South-East Asian and Pacific Island Odonata, 29, 1–34.
Tuva republic (RUS)	Asia	no	2	17	30	47	1.68124	0.566667					4.25532	11.7647	1.18621e-05	0.00027876	168604	5.22687			51.7833	51.7833	2010	Kosterin, O. E., & Zaika, V. V. (2010). Odonata of Tuva, Russia. International Journal of Odonatology, 13(2), 277–328. https://doi.org/10.1080/13887890.2010.9748380
North-East Asia (RUS)	N Asia	no	0	15	24	39	1.60206	0.625					0	0	0	4.8225e-06	8.08709e+06	6.90779			56	56	2019	Malikova, E. I., & Kosterin, O. E. (2019). Check-list of Odonata of the Russian Federation. Odonatologica, 48(1–2), 49–78. https://doi.org/10.5281/zenodo.2677689
Territories where inventaries are incomplete
Cuyo island (PHL)	SE Asia	yes	0	1	4	5	0.778151	0.25					0	0	0	0.0588582	84.95	1.92916	186		10.85	10.85	1997	Hämäläinen, M., & Mueller, R. A. (1997). Synopsis of the Philippine Odonata, with lists of species recorded from forty islands. Odonatologica, 26, 249–315.
Kisar island (IDN)	SE Asia	yes	0	0	2	2	0.477121	0					0	#DIV/0!	0	0.0238124	83.99	1.92423	155		-8.06	8.06	2020	Pinto, R. M. da S., Lopes, J. P., Trainor, C. R., & Seehausen, M. (2020). New records of Odonata from the eastern Lesser Sunda Islands of Timor, Semau, Rote, and Alor, with discovery of Hemicordulia eduardi (Odonata: Corduliidae). Faunistic Studies in South-East Asian and Pacific Island Odonata, 33, 1–60.
Maranhão (BR)	S America	no	1	13	17	30	1.49136	0.764706					3.33333	7.69231	3.0122e-06	9.0366e-05	331983	5.52112			-6.18333	6.18333	2019	Bastos, R. C., Brasil, L. S., Carvalho, F. G., Calvão, L. B., Silva, J. O. D. A., & Juen, L. (2019). Odonata of the state of Maranhão, Brazil: Wallacean shortfall and priority areas for faunistic inventories. Biota Neotropica, 19(4), e20190734. https://doi.org/10.1590/1676-0611-bn-2019-0734
Pantar island (IDN)	SE Asia	yes	0	1	1	2	0.477121	1					0	0	0	0.00274725	728	2.86213	825		-8.25	8.25	2020	Pinto, R. M. da S., Lopes, J. P., Trainor, C. R., & Seehausen, M. (2020). New records of Odonata from the eastern Lesser Sunda Islands of Timor, Semau, Rote, and Alor, with discovery of Hemicordulia eduardi (Odonata: Corduliidae). Faunistic Studies in South-East Asian and Pacific Island Odonata, 33, 1–60.
Paraná (BR)	S America	no	1	34	63	97	1.99123	0.539683					1.03093	2.94118	5.01759e-06	0.000486706	199299	5.29951			-24	24	2023	de Gouvêa, T. P., Vilela, D. S., de Oliveira, T. M. D., Ferreira, E. D. F., de Almeida, J. A. M., de Souza, A. S. B., Shimamoto, C. Y., Barbado, N., & de Souza, M. M. (2023). Survey of Odonata from two conservation units in Western Paraná, Southern Brazil. Odonatologica, 52(3/4), 219–232.
Romang island (IDN)	SE Asia	yes	0	0	1	1	0.30103	0					0	#DIV/0!	0	0.0059453	168.2	2.22583	717		-7.58333	7.58333	2020	Pinto, R. M. da S., Lopes, J. P., Trainor, C. R., & Seehausen, M. (2020). New records of Odonata from the eastern Lesser Sunda Islands of Timor, Semau, Rote, and Alor, with discovery of Hemicordulia eduardi (Odonata: Corduliidae). Faunistic Studies in South-East Asian and Pacific Island Odonata, 33, 1–60.
Saint Helena, Ascension and Tristan da Cunha (GRB)	Atlantic ocean	yes	0	0	1	1	0.30103	0					0	#DIV/0!	0	0.00253807	394	2.5955	2062		-15.9333	15.9333	2022	Sandall, E. L., Pinkert, S., & Jetz, W. (2022). Country‐level checklists and occurrences for the world’s Odonata (dragonflies and damselflies). Journal of Biogeography, 49(8), 1586–1598. https://doi.org/10.1111/jbi.14457
Siasi island (PHL)	SE Asia	yes	0	1	1	2	0.477121	1					0	0	0	0.0103697	192.87	2.28526	490		5.5462	5.5462	1997	Hämäläinen, M., & Mueller, R. A. (1997). Synopsis of the Philippine Odonata, with lists of species recorded from forty islands. Odonatologica, 26, 249–315.
Tablas island (PHL)	SE Asia	yes	0	0	1	1	0.30103	0					0	#DIV/0!	0	0.00119167	839.156	2.92384	665		12.4053	12.4053	1997	Hämäläinen, M., & Mueller, R. A. (1997). Synopsis of the Philippine Odonata, with lists of species recorded from forty islands. Odonatologica, 26, 249–315.
Wetar island (IDN)	SE Asia	yes	0	3	5	8	0.954243	0.6					0	0	0	0.00301682	2651.8	3.42354	1412		-7.8	7.8	2020	Pinto, R. M. da S., Lopes, J. P., Trainor, C. R., & Seehausen, M. (2020). New records of Odonata from the eastern Lesser Sunda Islands of Timor, Semau, Rote, and Alor, with discovery of Hemicordulia eduardi (Odonata: Corduliidae). Faunistic Studies in South-East Asian and Pacific Island Odonata, 33, 1–60.
